# Supplementary material
Source: PubMed Central journal article supplement (PMC8086191)
Supplement: NIHMS1649690-supplement-Supplementary_Figure_S7.pdf [file NIHMS1649690-supplement-Supplementary_Figure_S7.pdf]

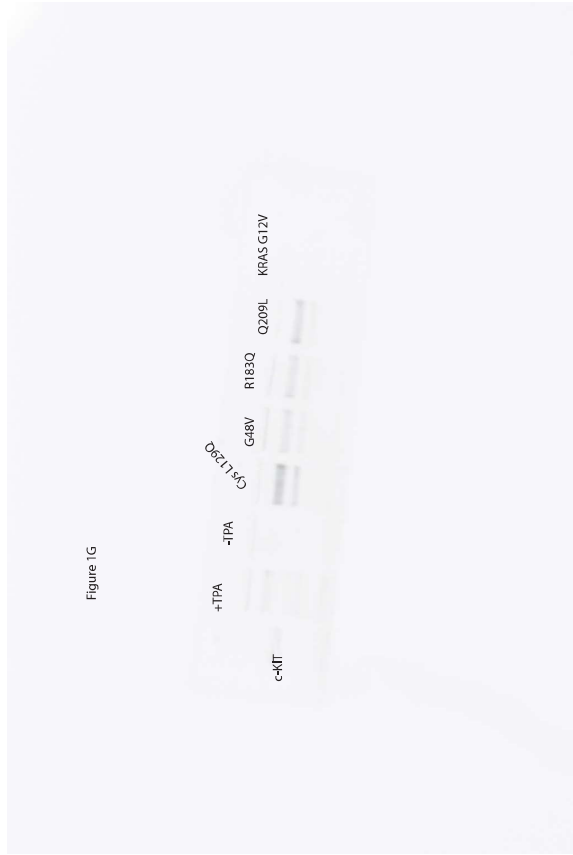

Figure 1G

Figure 1G

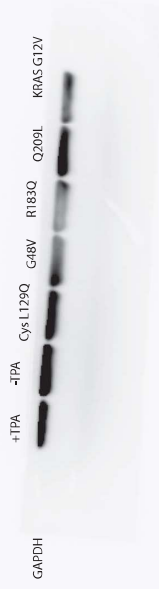

Figure 1G

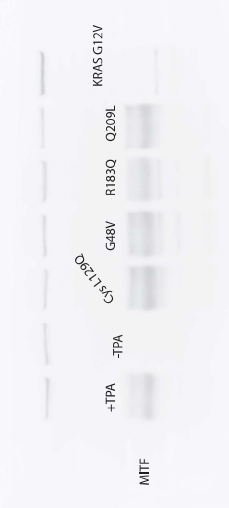

Figure 1G

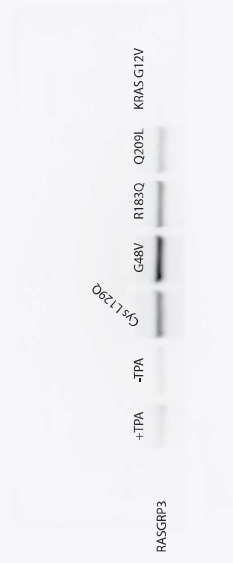





Figure 2B

Cyclin D1  
CYSLTR2 L129Q  
0, 2, 4, 8, 24, 24+TPA

Cyclin D1  
GNAQ Q48V  
0, 2, 4, 8, 24, 24+ TPA

Cyclin D1  
GNAQ R183Q  
0, 2, 4, 8, 24, 24+TPA

Cyclin D1  
GNAQ Q209L  
0, 2, 4, 8, 24, 24+TPA

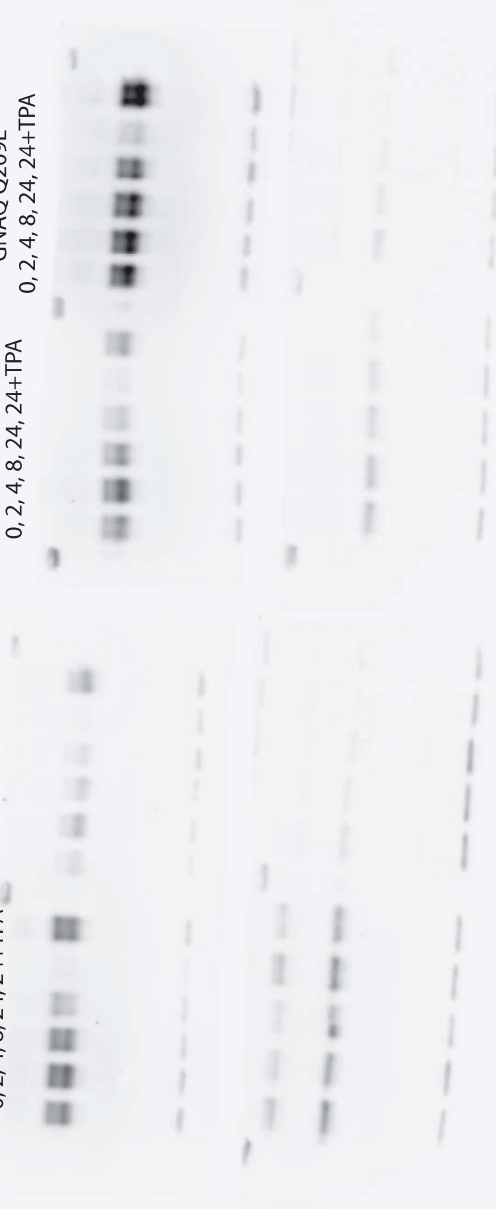

GAPDH CYSLTR2 L129Q GAPDH GNAQ Q48V  
0, 2, 4, 8, 24, 24+TPA 0, 2, 4, 8, 24, 24+TPA

GAPDH  
GNAQ R183Q  
0, 2, 4, 8, 24, 24+TPA

GAPDH  
GNAQ Q209L  
0, 2, 4, 8, 24, 24+TPA

Figure 2B

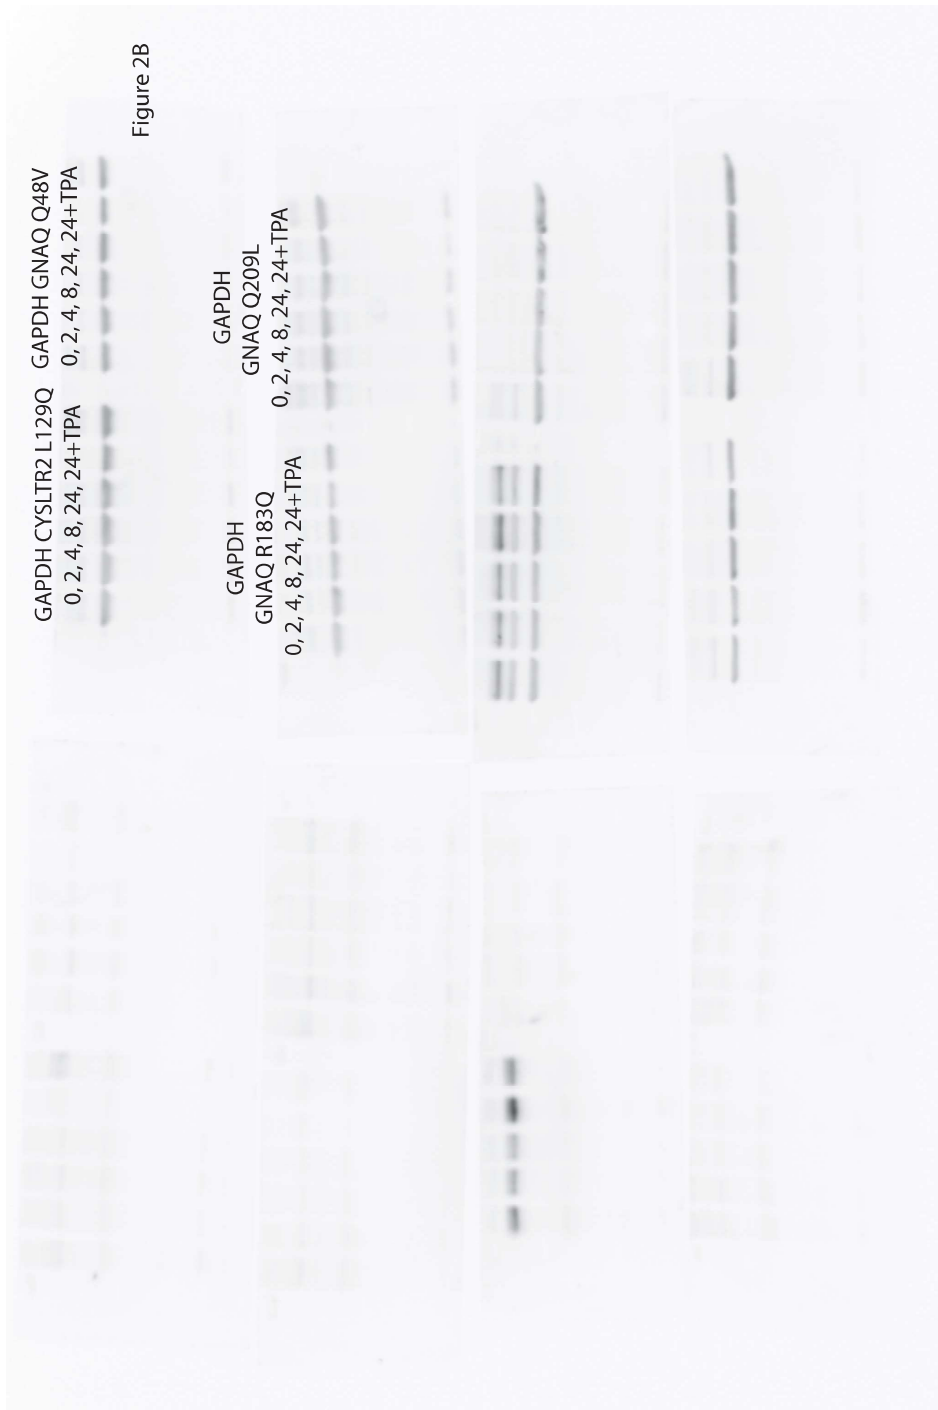

Figure 2B

p-GRF  
CYSLTR2 L129Q  
0, 2, 4, 8, 24, 24+TPA

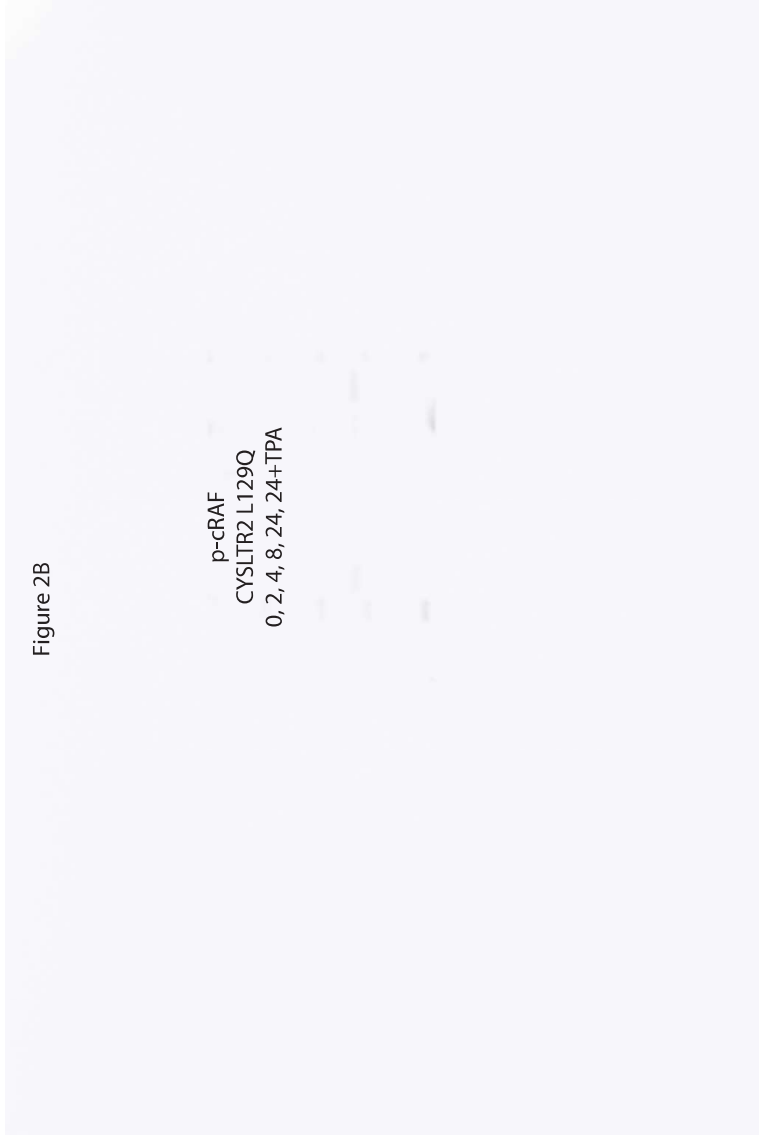

Figure 2B

|                                                     |                                                 |                                                  |                                                  |
|-----------------------------------------------------|-------------------------------------------------|--------------------------------------------------|--------------------------------------------------|
| p-ERK1/2<br>CYSLTR2 L129Q<br>0, 2, 4, 8, 24, 24+TPA | p-ERK1/2<br>GNAQ Q48V<br>0, 2, 4, 8, 24, 24+TPA | p-ERK1/2<br>GNAQ R183Q<br>0, 2, 4, 8, 24, 24+TPA | p-ERK1/2<br>GNAQ Q209L<br>0, 2, 4, 8, 24, 24+TPA |
|-----------------------------------------------------|-------------------------------------------------|--------------------------------------------------|--------------------------------------------------|

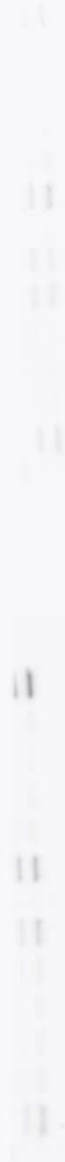

Figure 2B

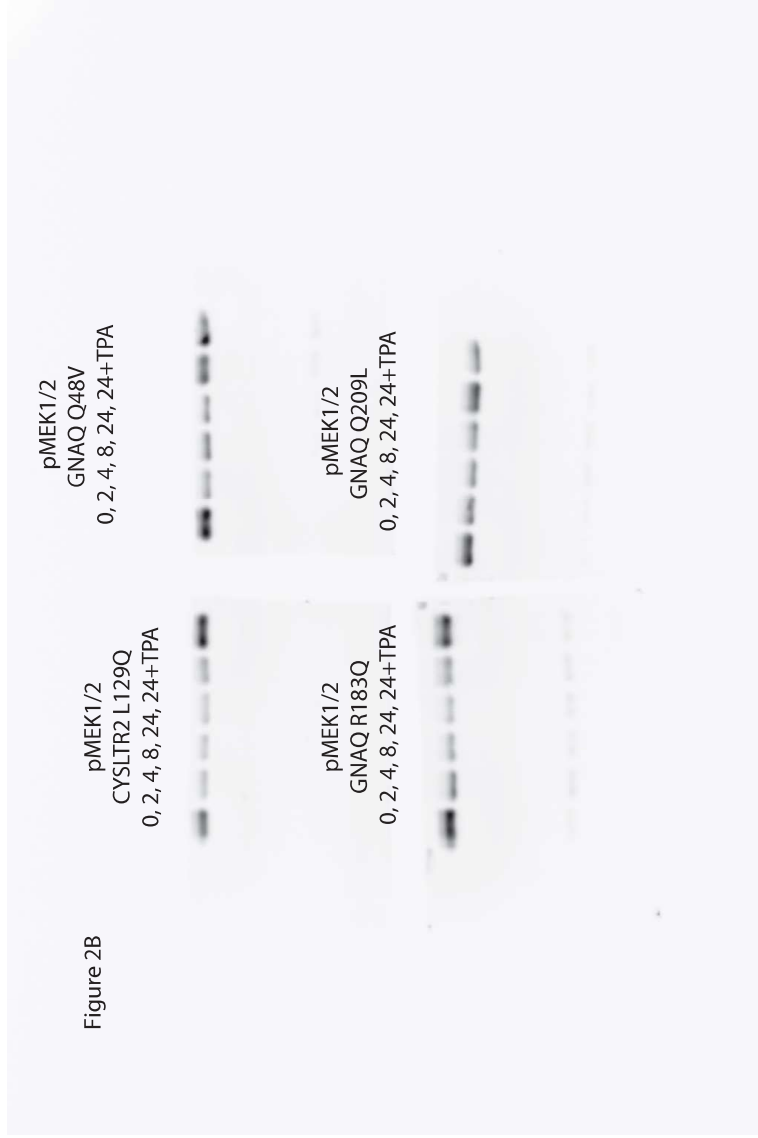

Figure 2B

p-RASGRP3  
CYSLTR2 L129Q  
0, 2, 4, 8, 24, 24+TPA

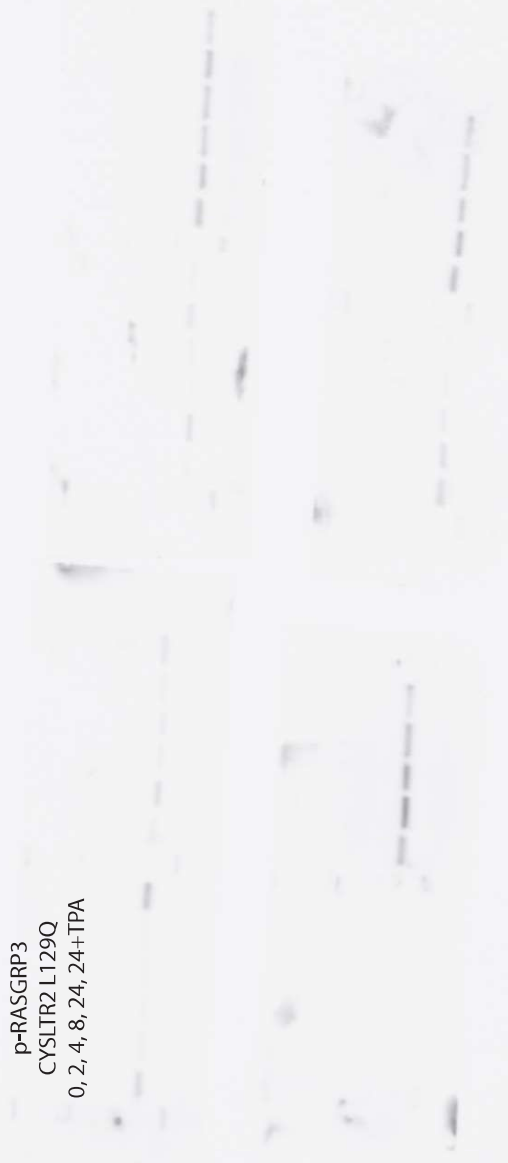

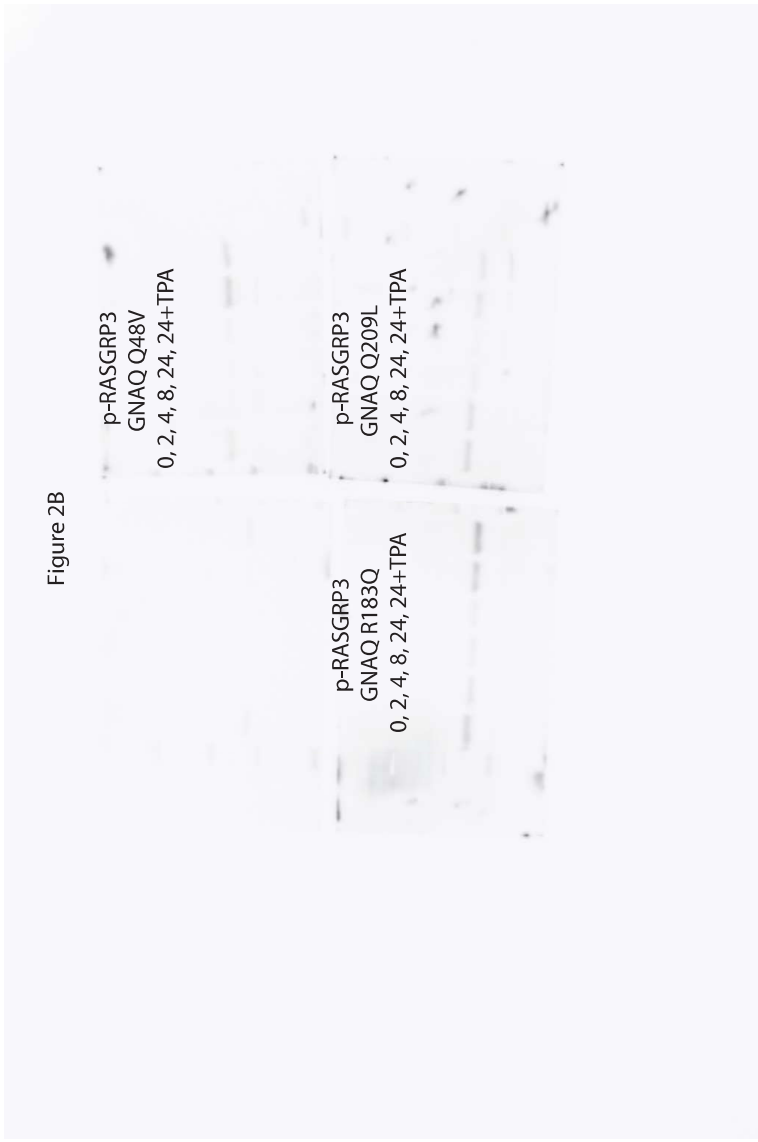



Figure 2B

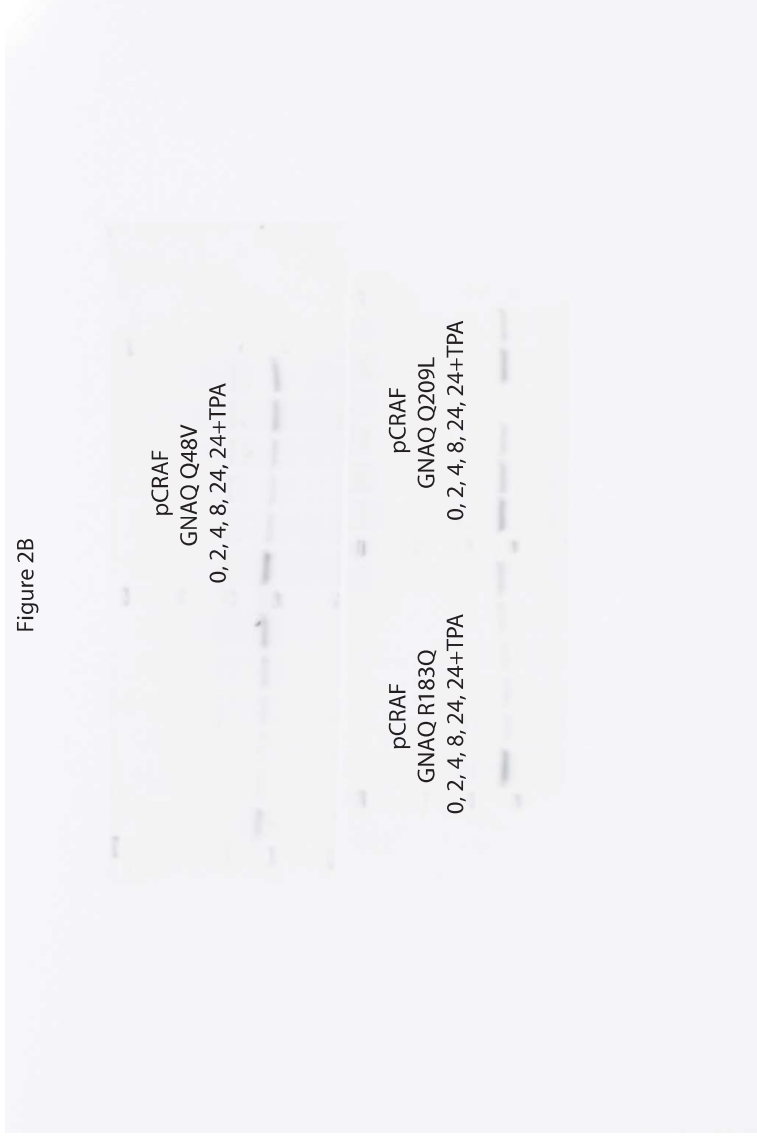

Figure 2B

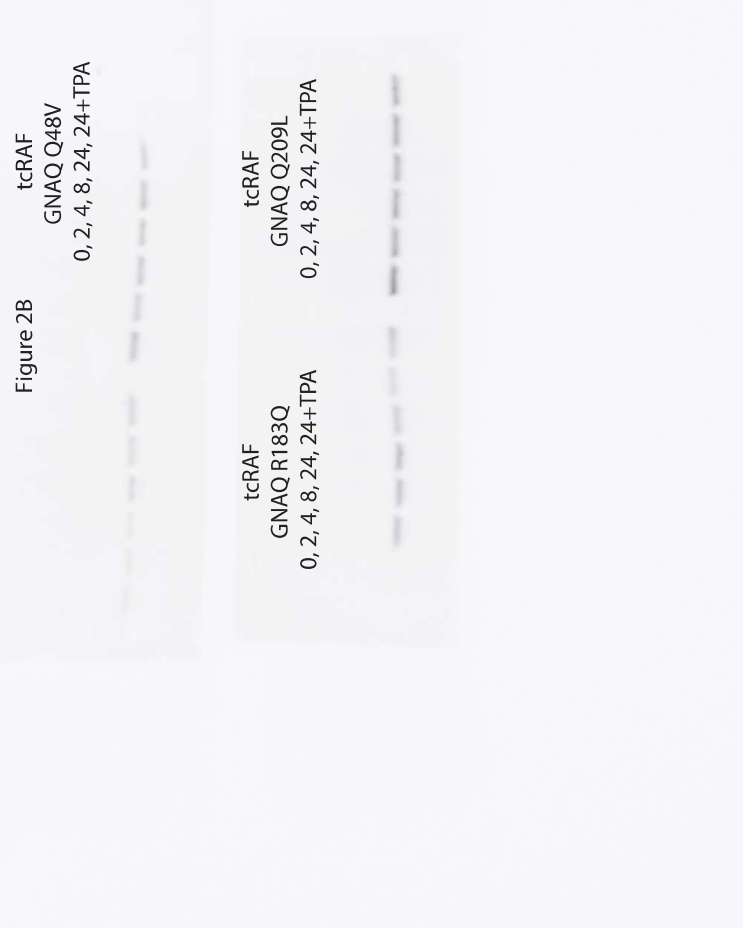

Figure 2B

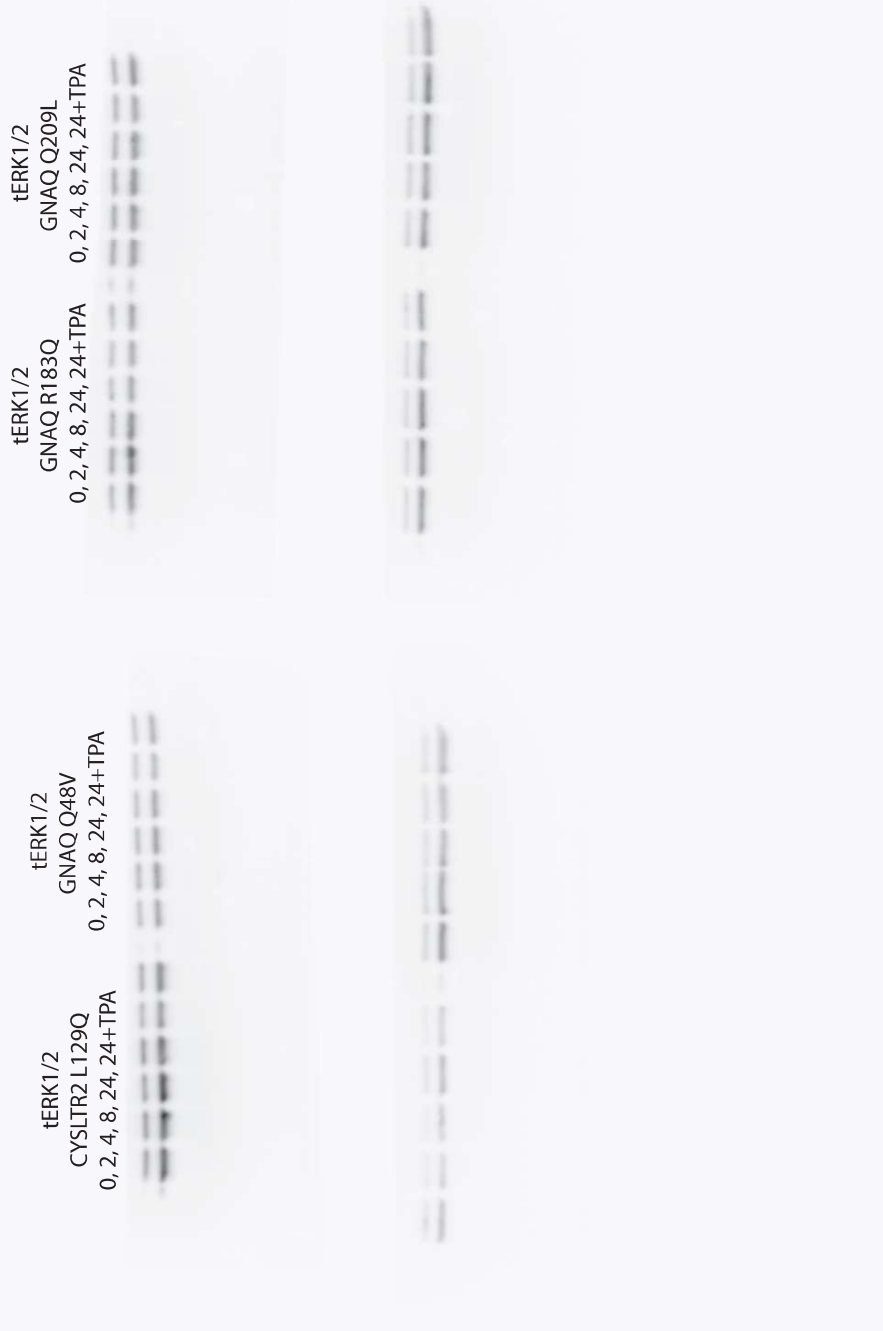

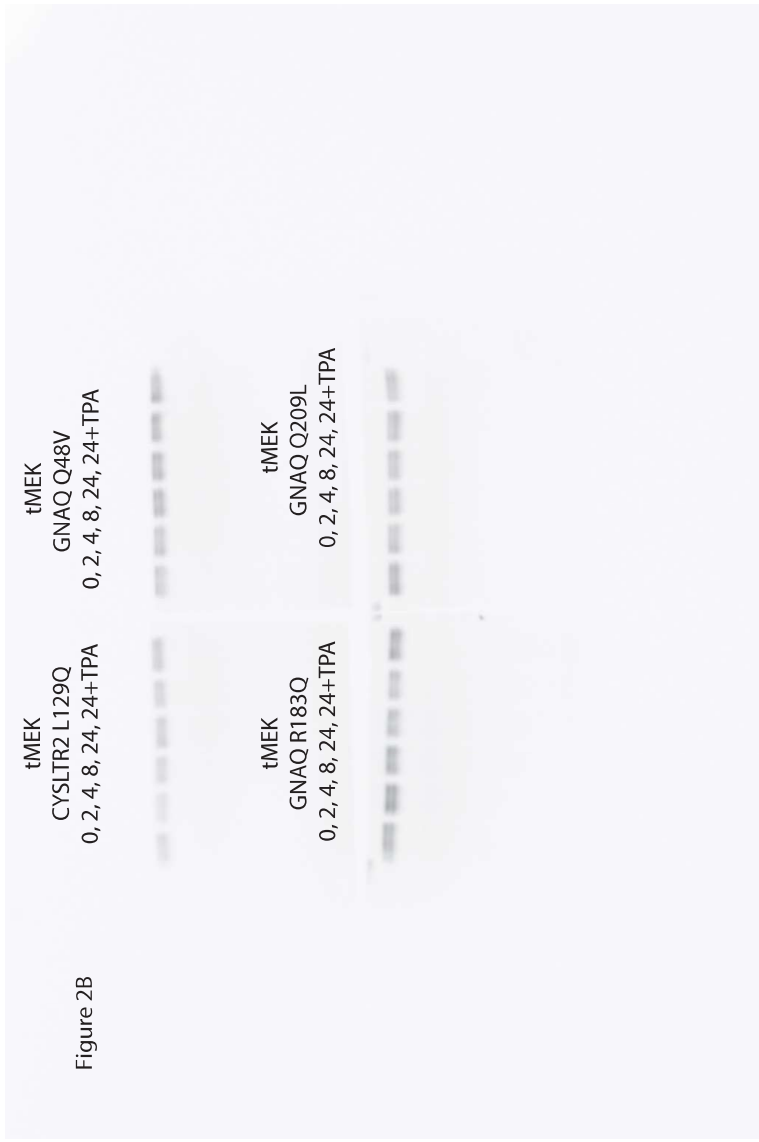

Figure 2B

tRAFGRP3  
CYSLTR2 L129Q  
0, 2, 4, 8, 24, 24+TPA

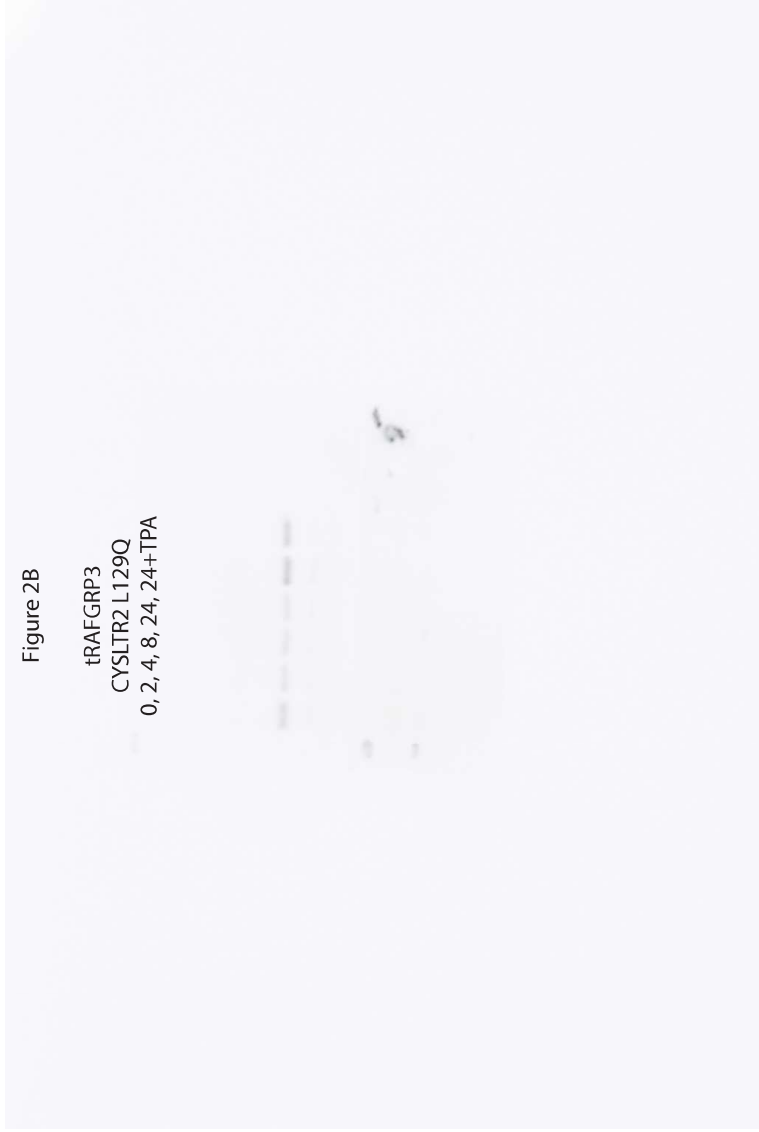

Figure 2B

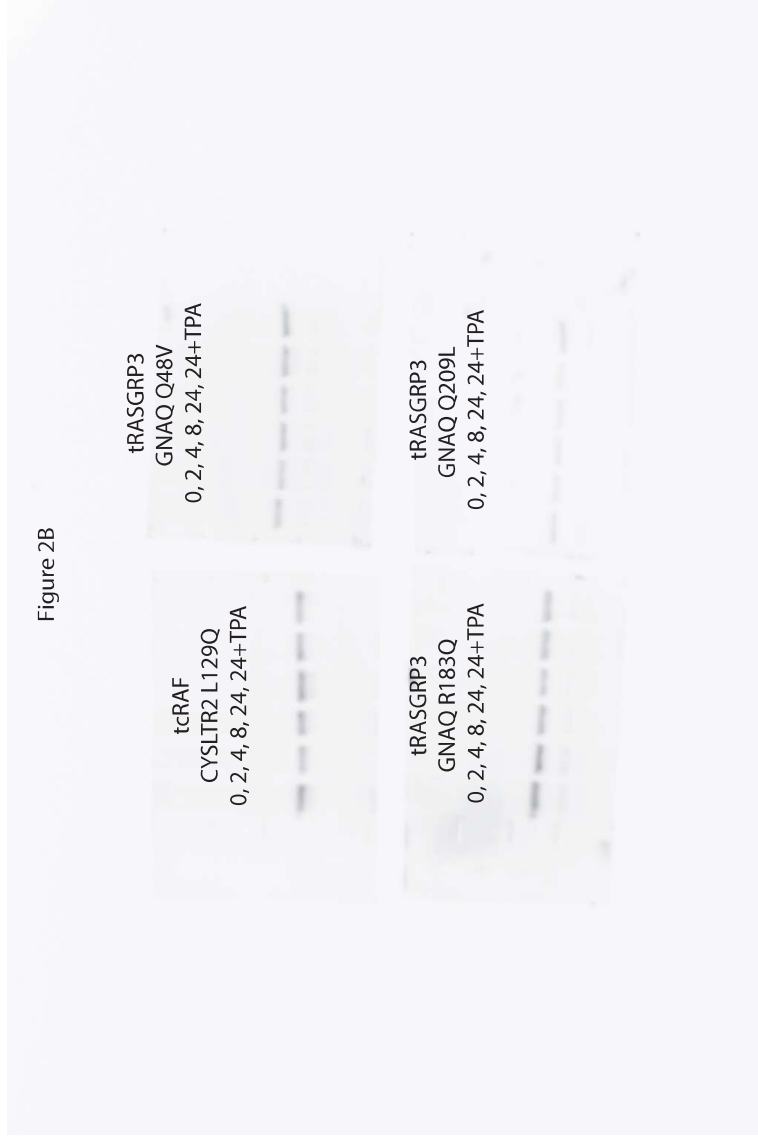

Figure 2D

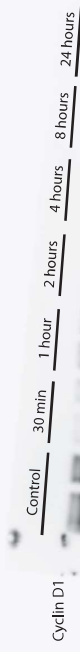

Figure 2D

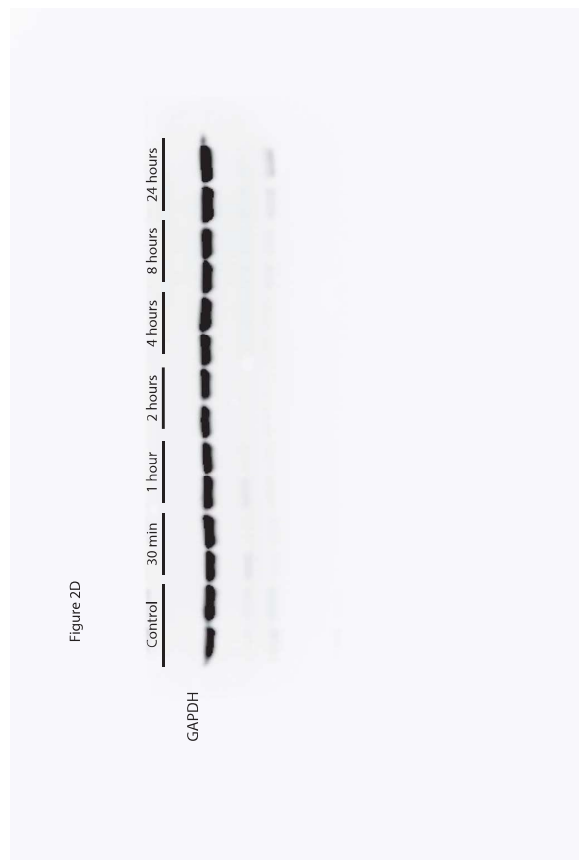



Figure 2D

Control 30 min 1 hour 2 hours 4 hours 8 hours 24 hours

pCRAF

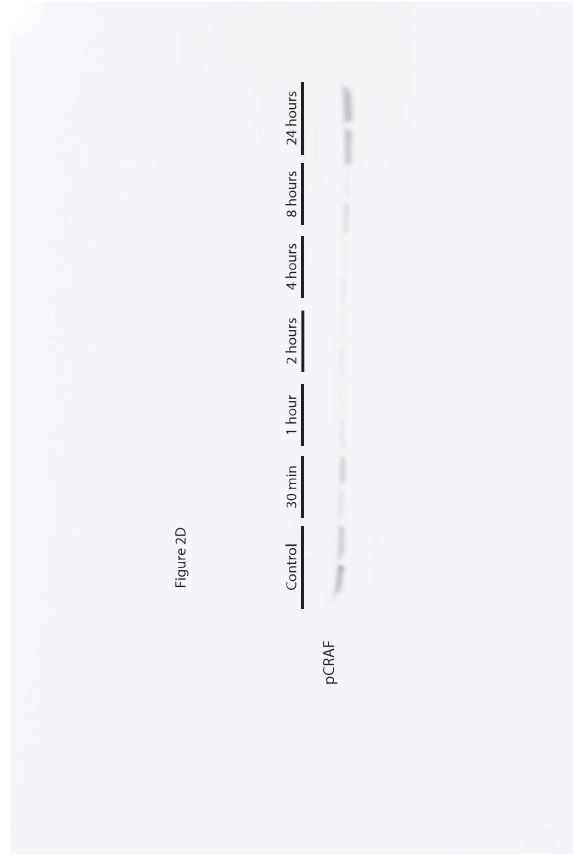

Figure 2D

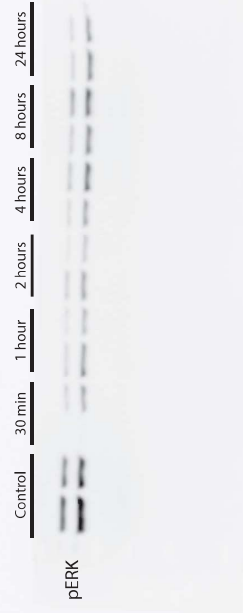

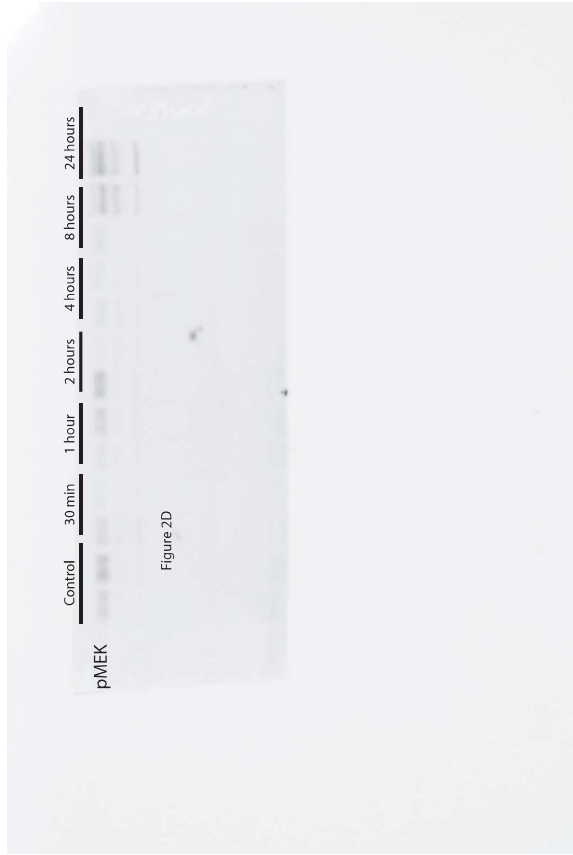

Figure 2D

Control 30 min 1 hour 2 hours 4 hours 8 hours 24 hours

pRASGRP3

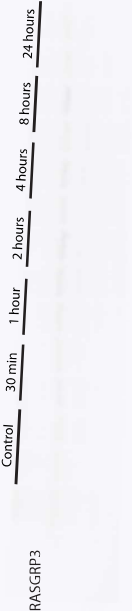

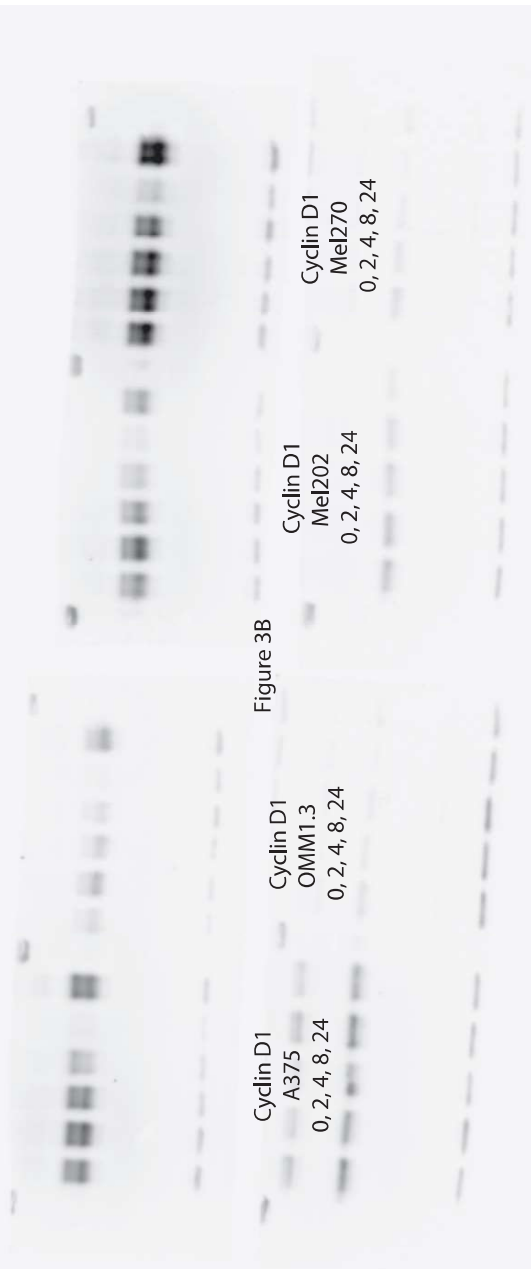

Figure 3B

Cyclin D1  
A375  
0, 2, 4, 8, 24

Cyclin D1  
OMM1.3  
0, 2, 4, 8, 24

Cyclin D1  
Mel202  
0, 2, 4, 8, 24

Cyclin D1  
Mel270  
0, 2, 4, 8, 24

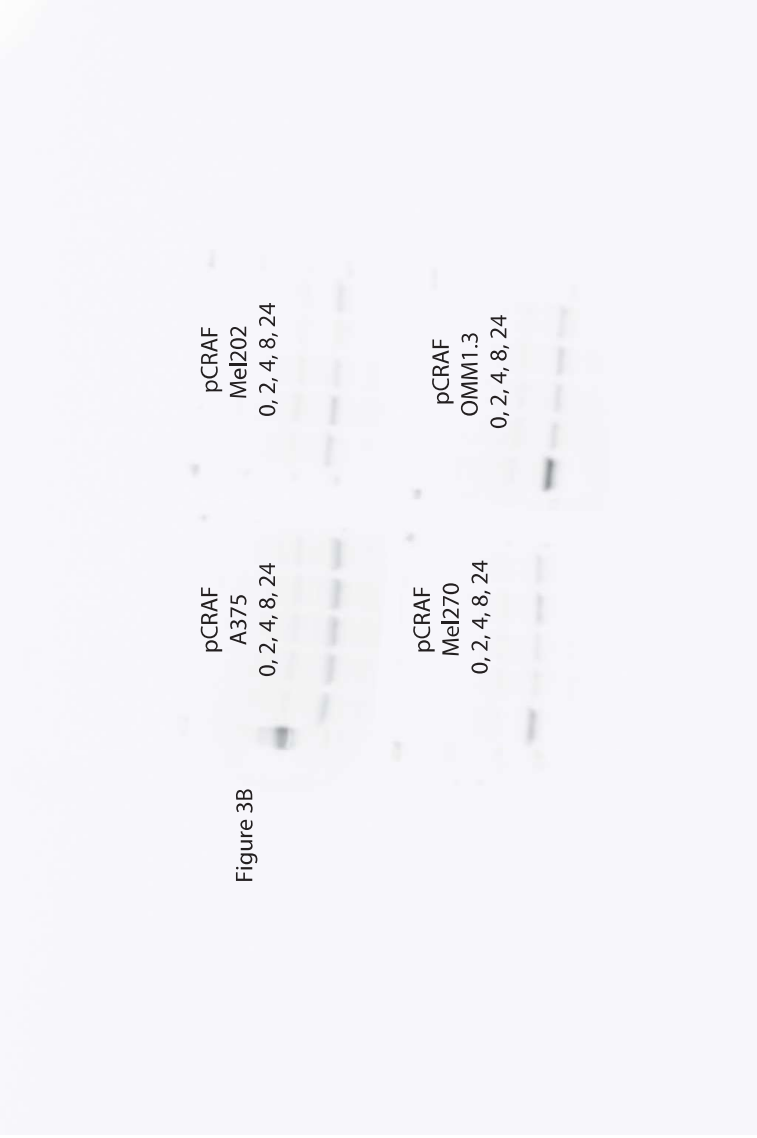

Figure 3B

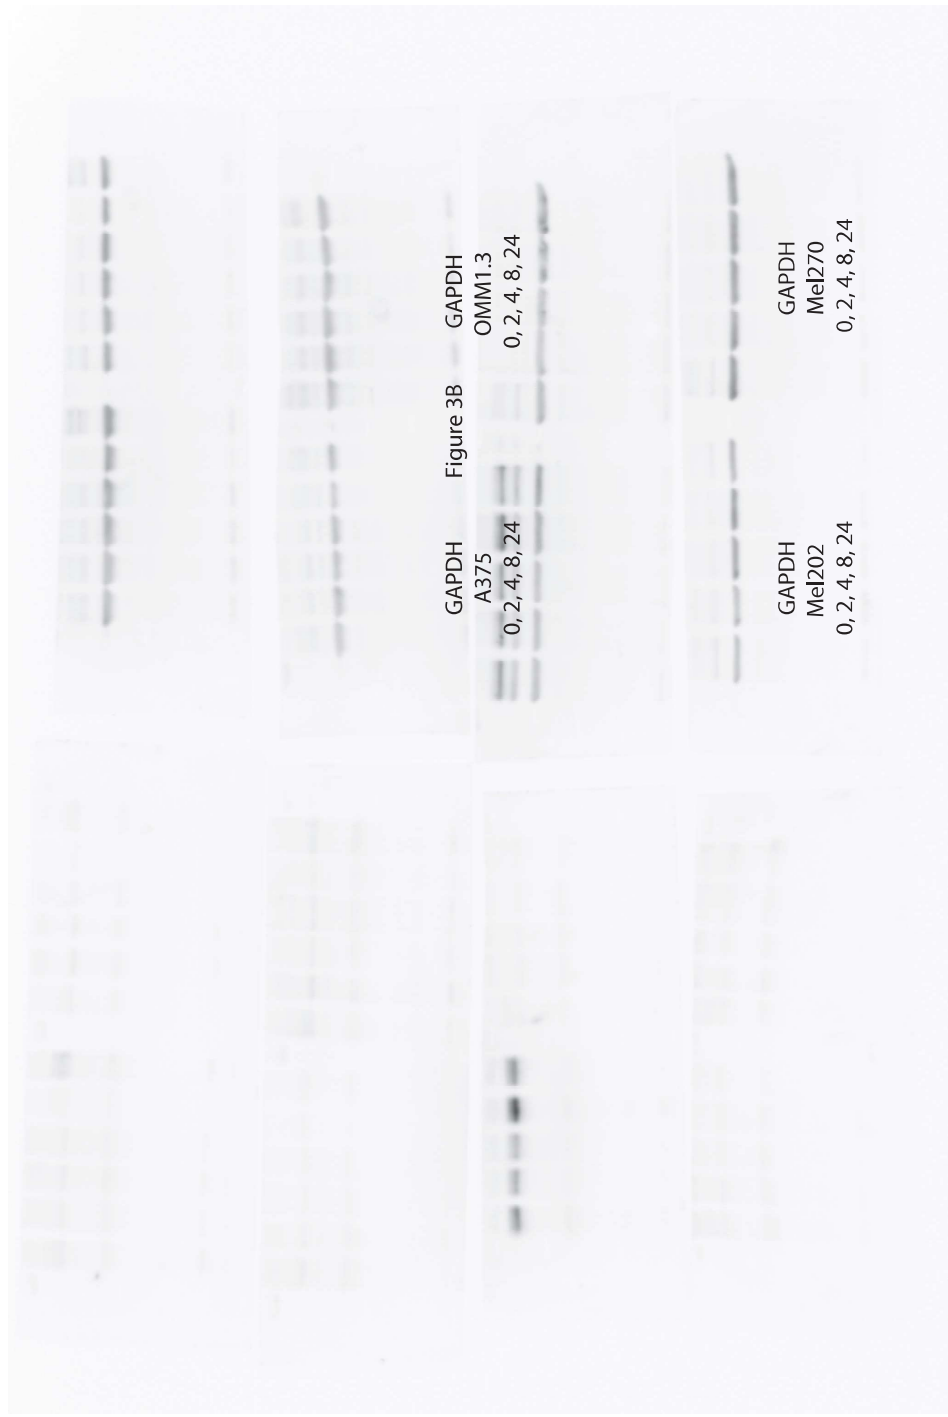

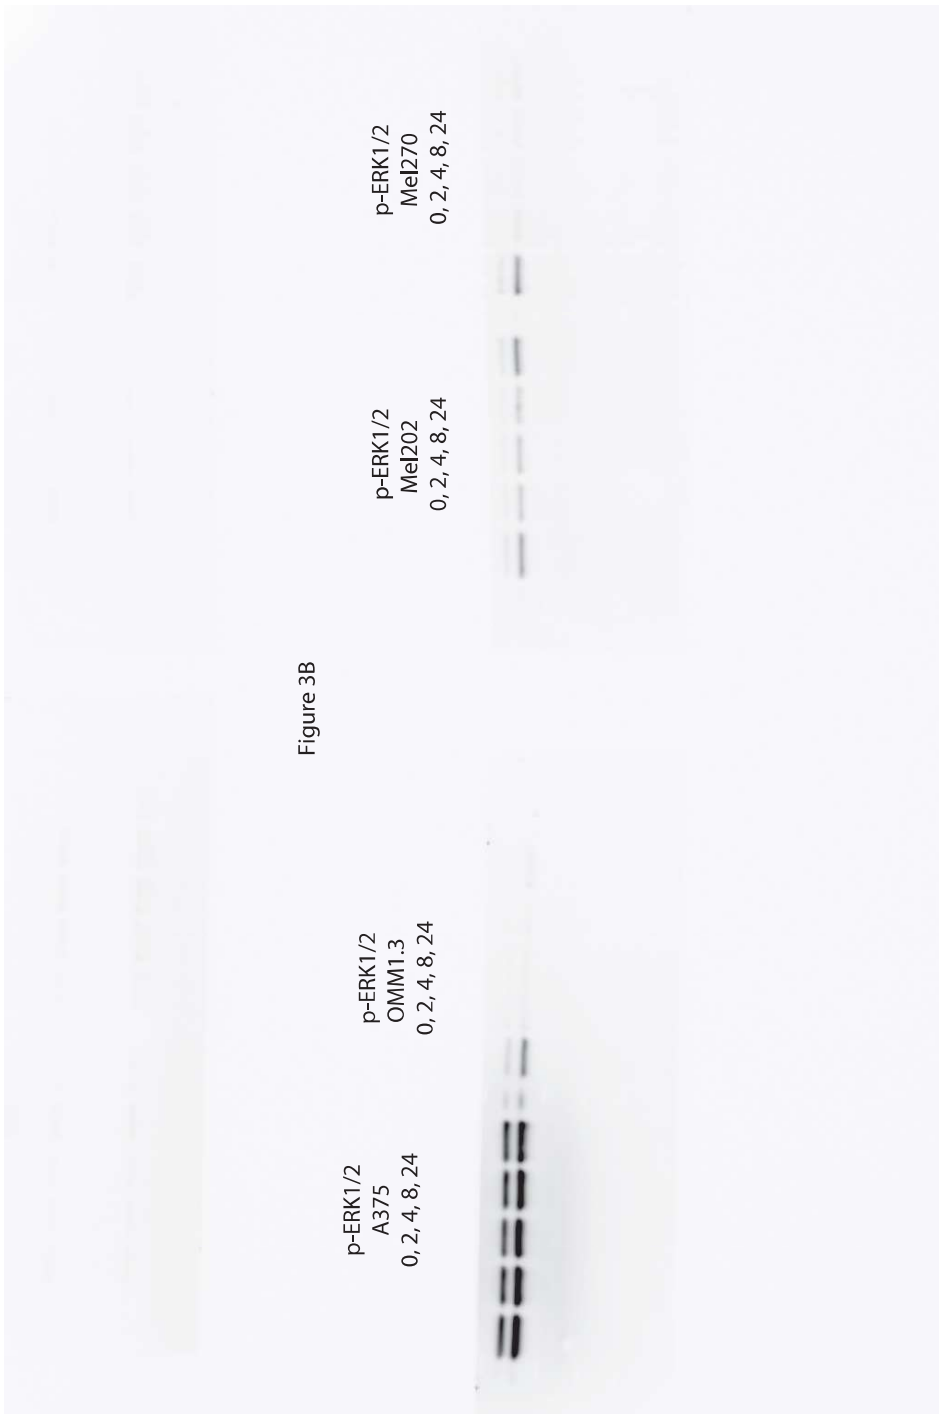

Figure 3B



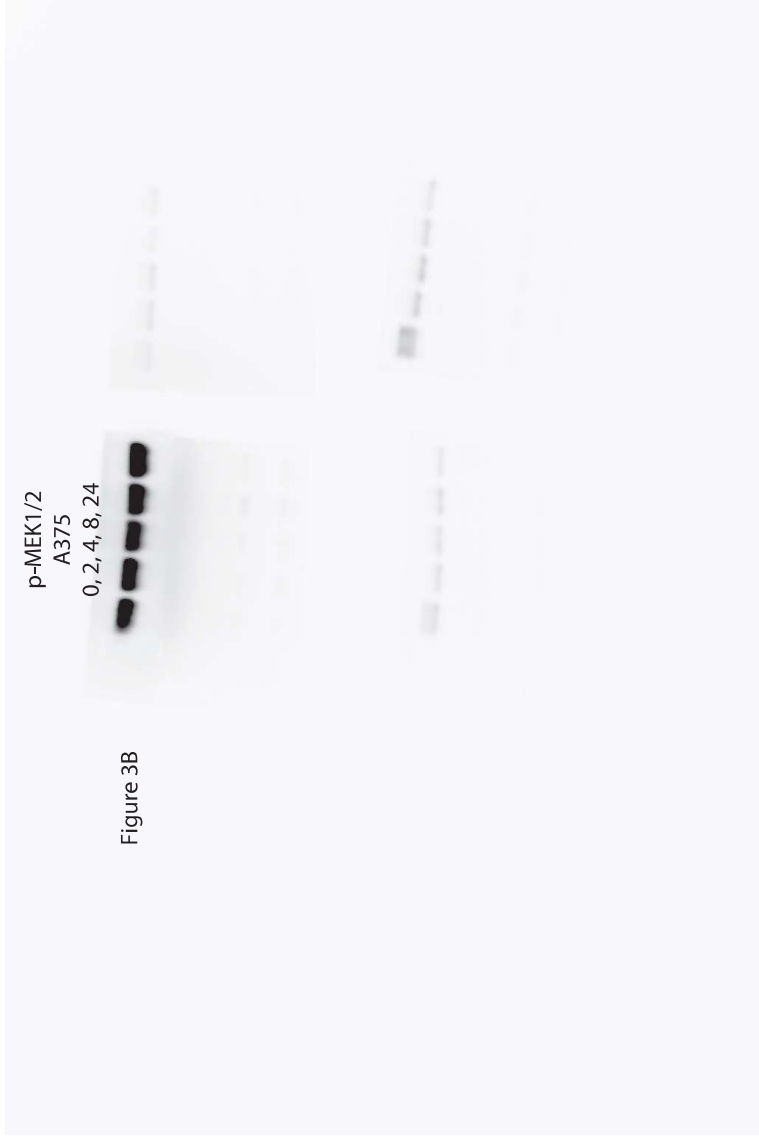

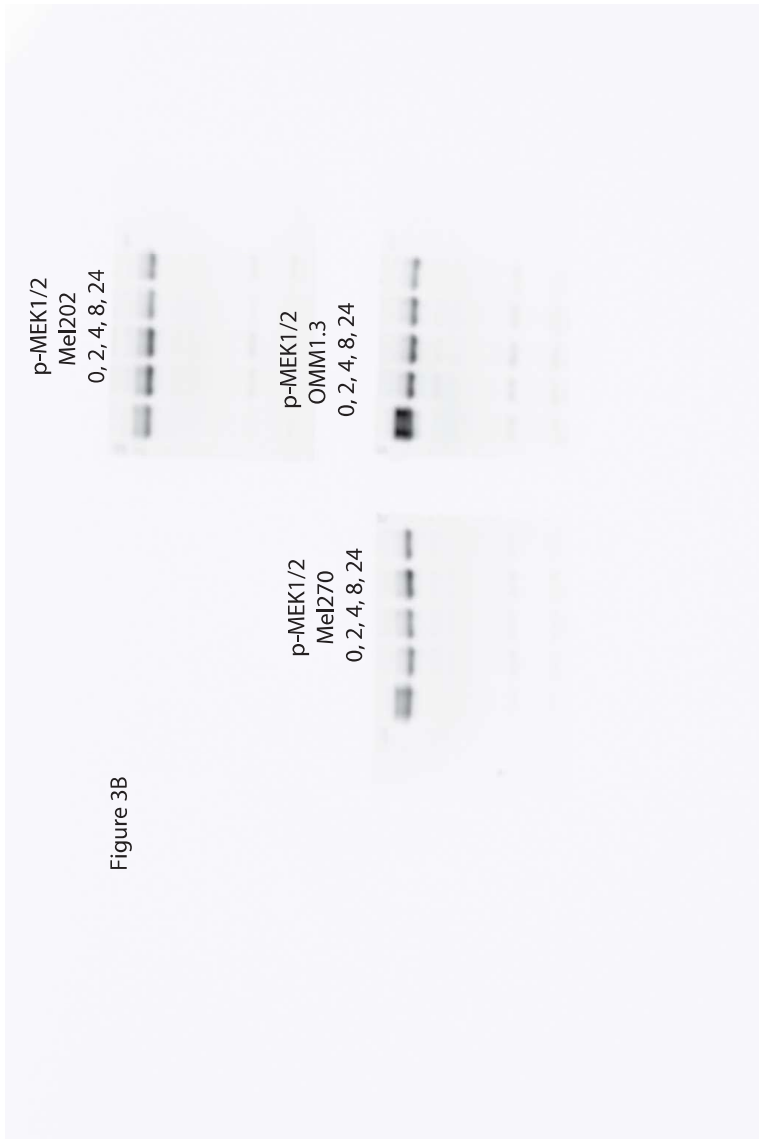

Figure 3B

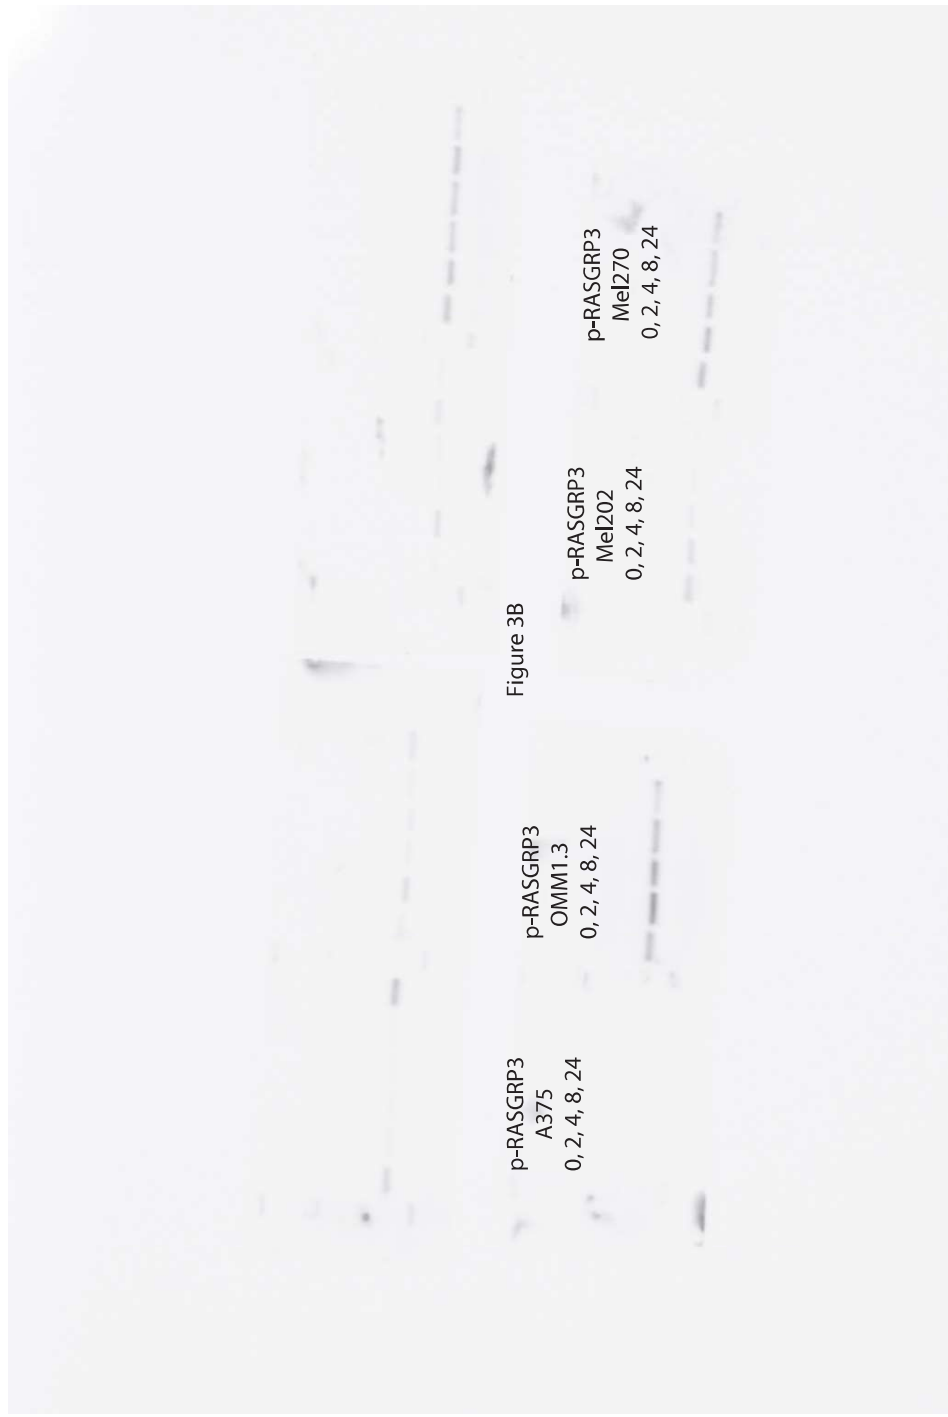

Figure 3B

p-RASGRP3  
A375  
0, 2, 4, 8, 24

p-RASGRP3  
OMM1.3  
0, 2, 4, 8, 24

p-RASGRP3  
Mel202  
0, 2, 4, 8, 24

p-RASGRP3  
Mel270  
0, 2, 4, 8, 24

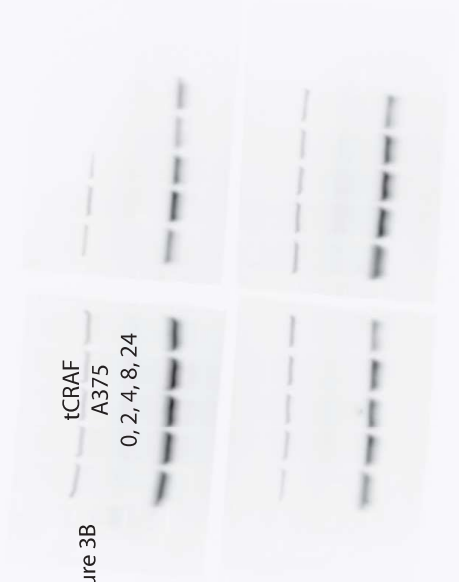

Figure 3B

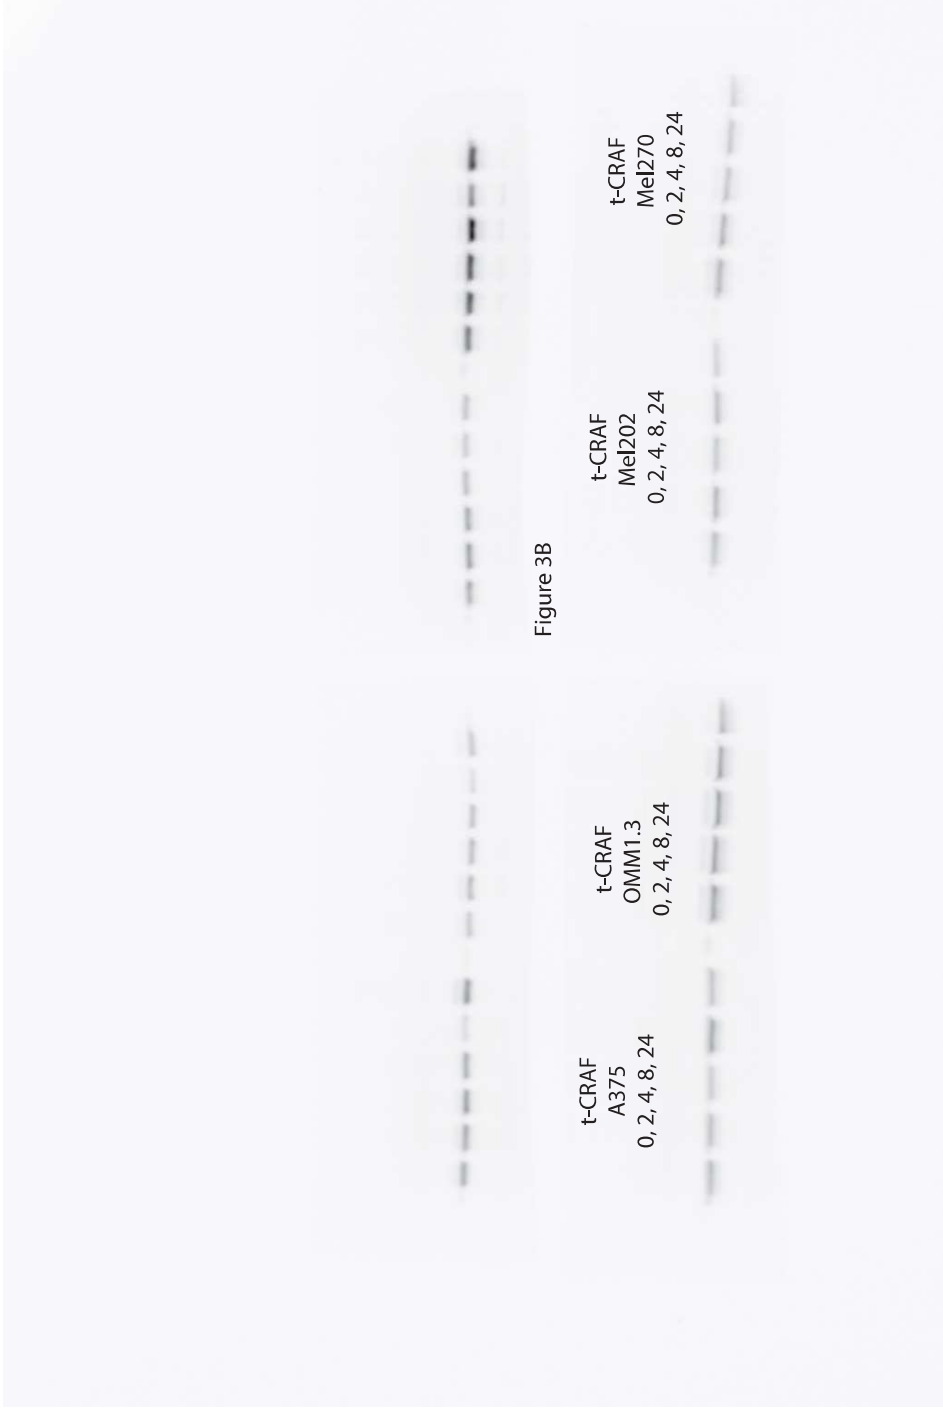

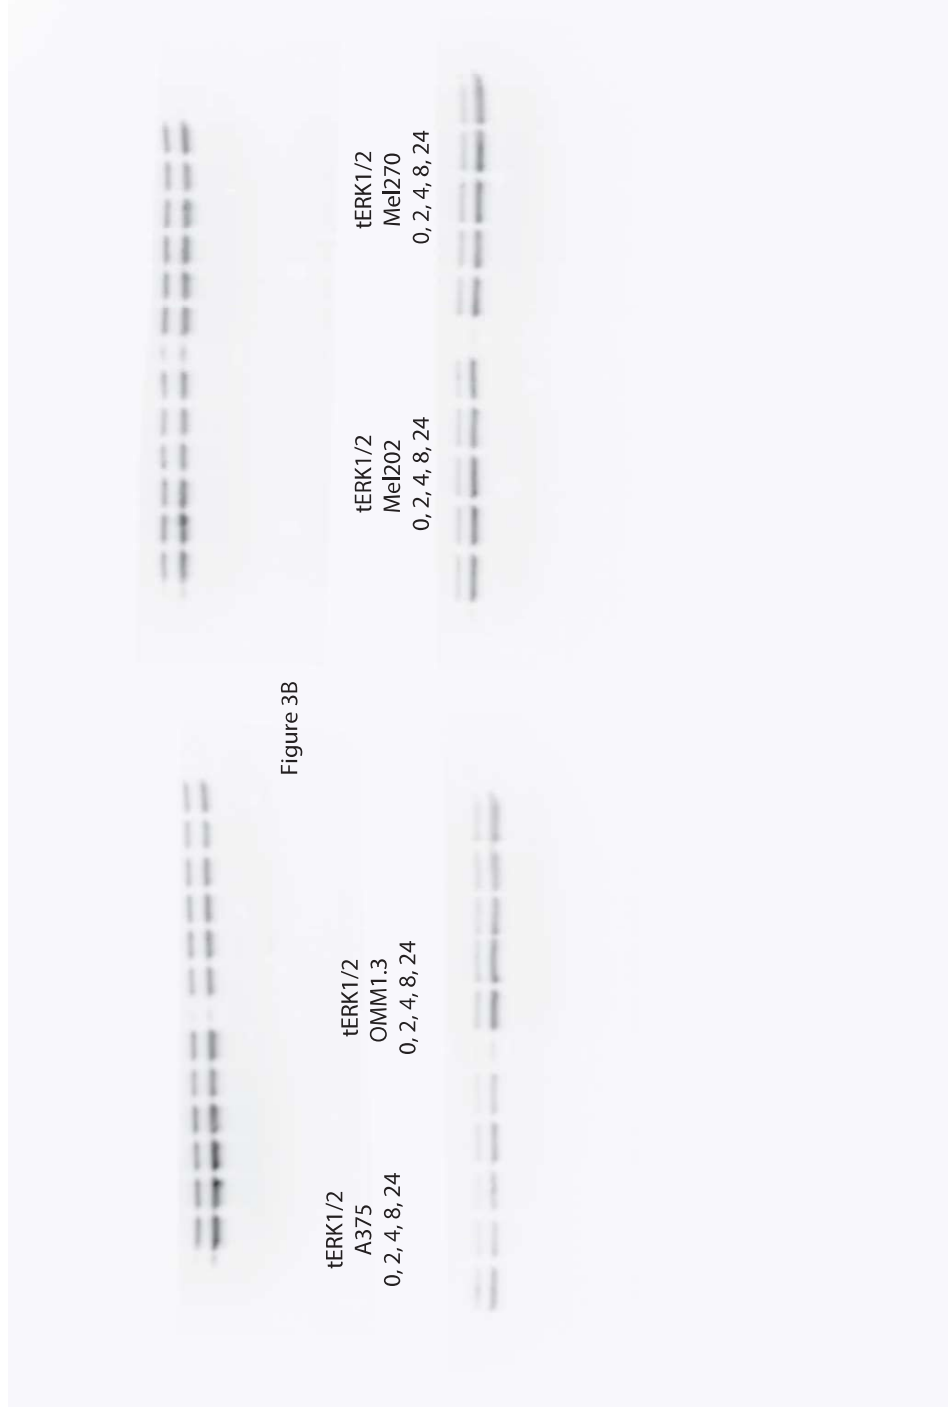

Figure 3B

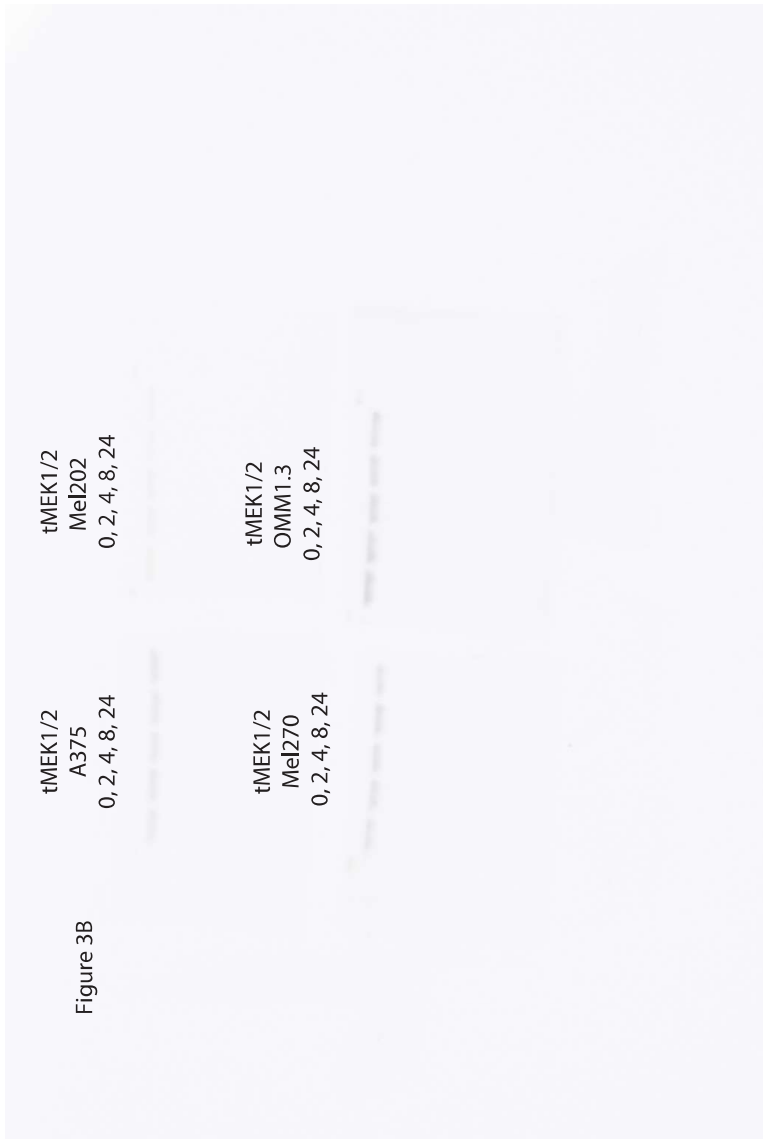

Figure 3B

Figure 4G pRASGRP3

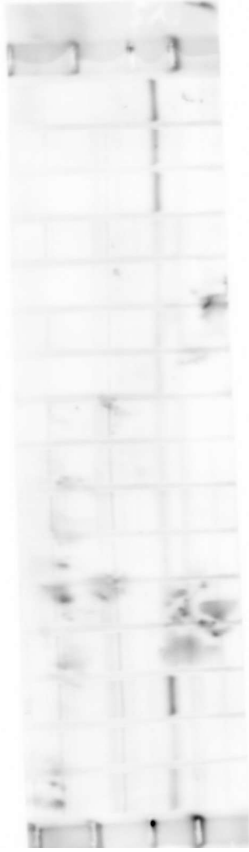



Figure 4G pCRAF

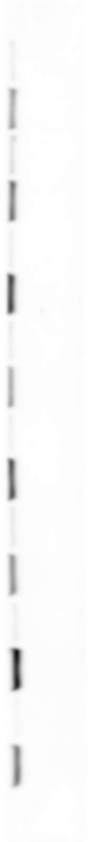

Figure 4G pMEK

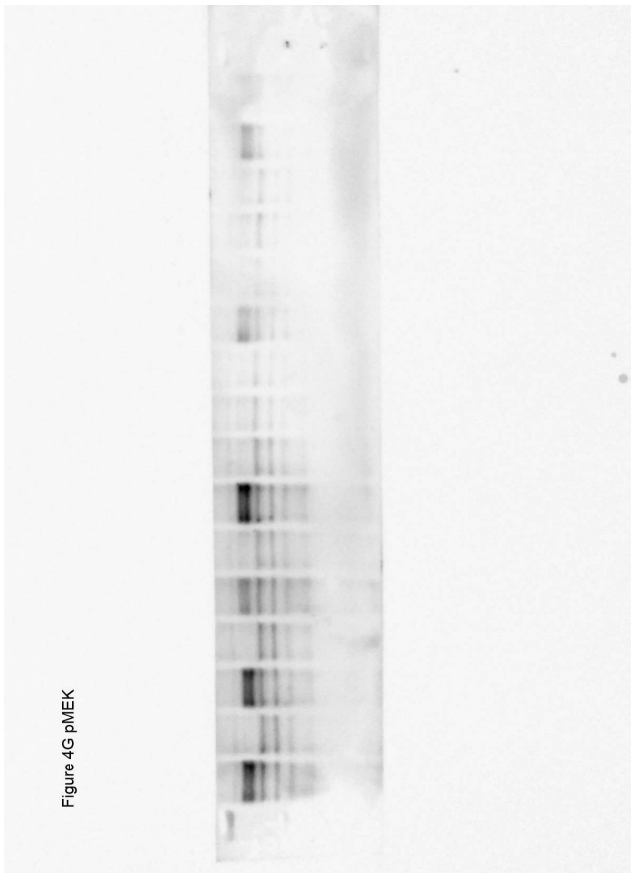

Figure 4G pERK

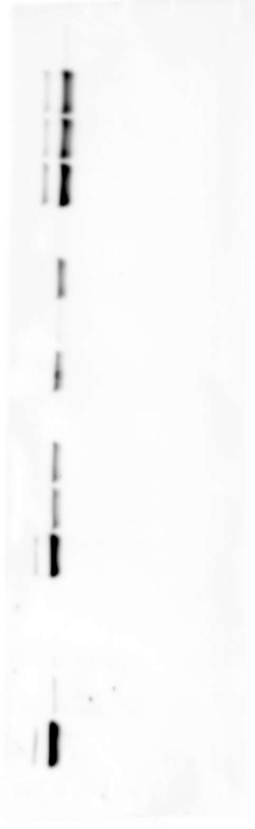

Figure 4G Cyclin D1

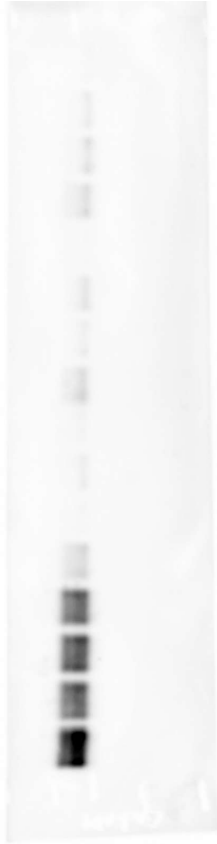

Figure 4G vinculin

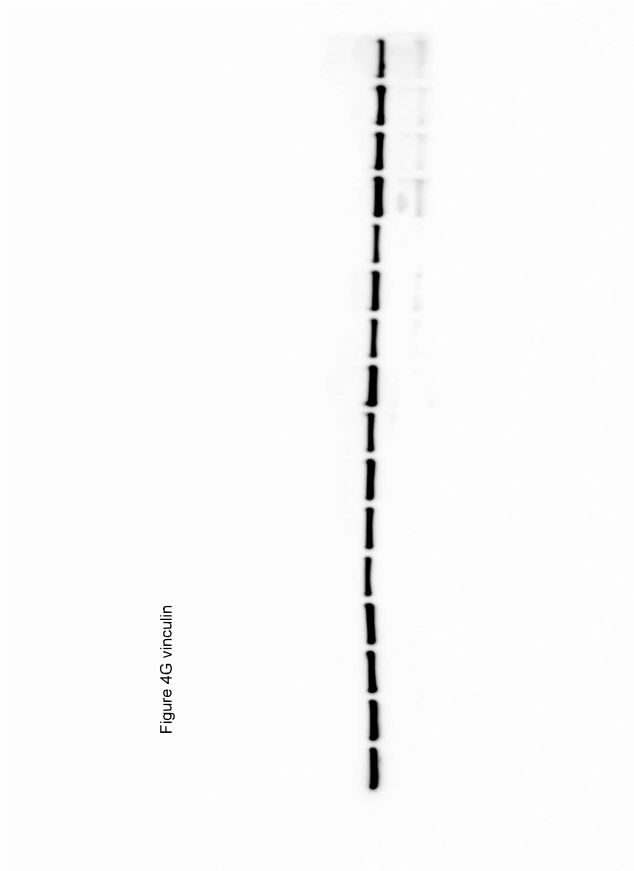

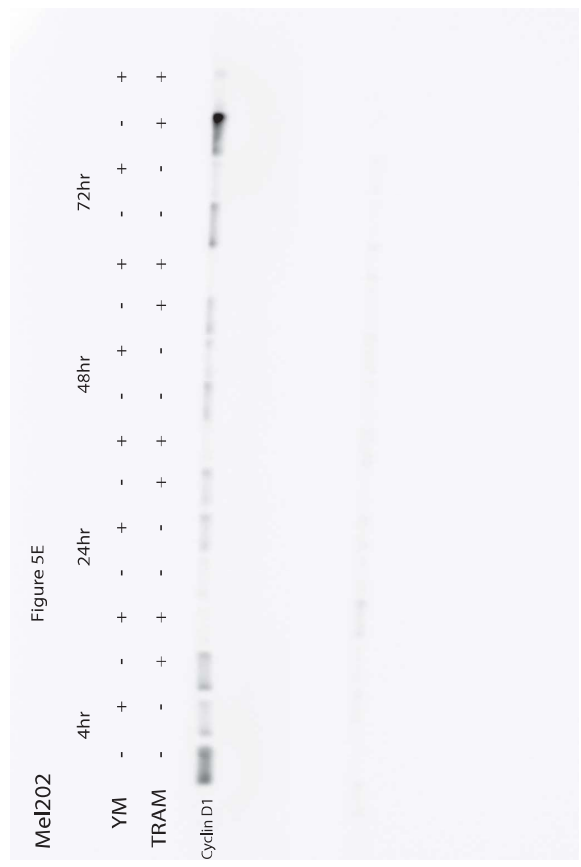

Figure 5F

| OMM1.3 | 4hr | 24hr | 48hr | 72hr | YM | TRAM |
|--------|-----|------|------|------|----|------|
| -      | +   | -    | +    | -    | +  | -    |
| -      | -   | +    | -    | +    | -  | +    |

Cyclin D1

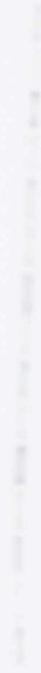

Figure 5E&F

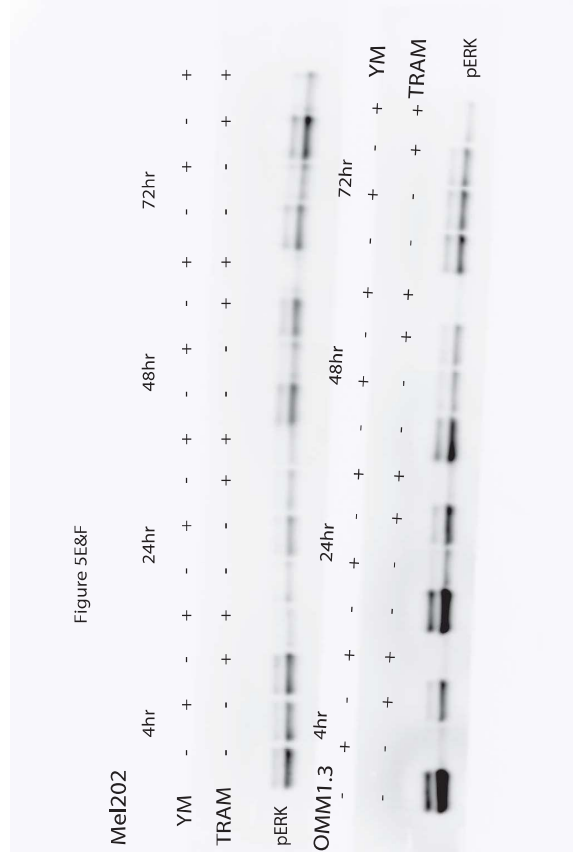



Figure 5E/F

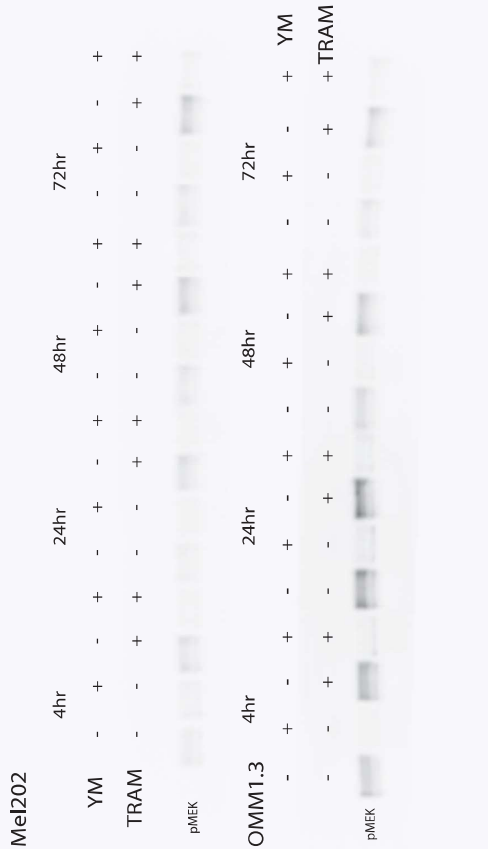

Figure 5E/F

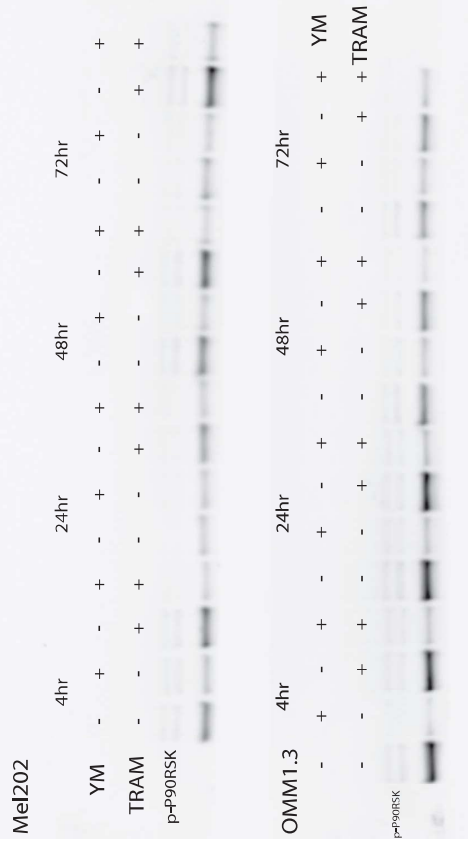

Figure 5E/F

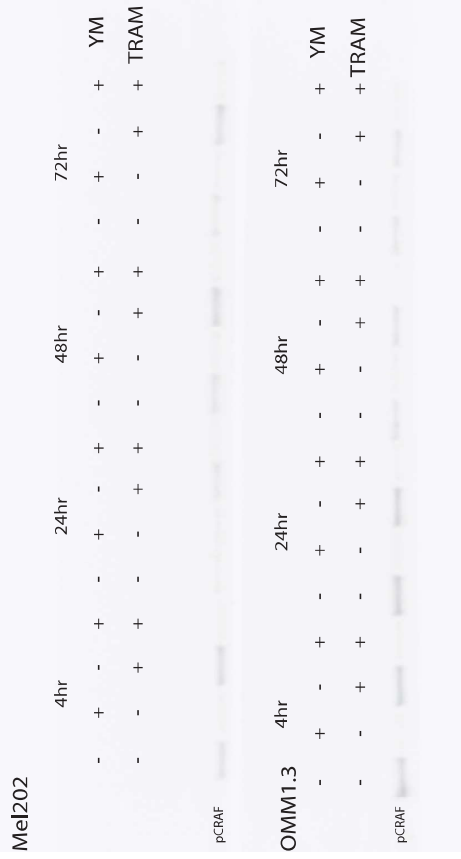

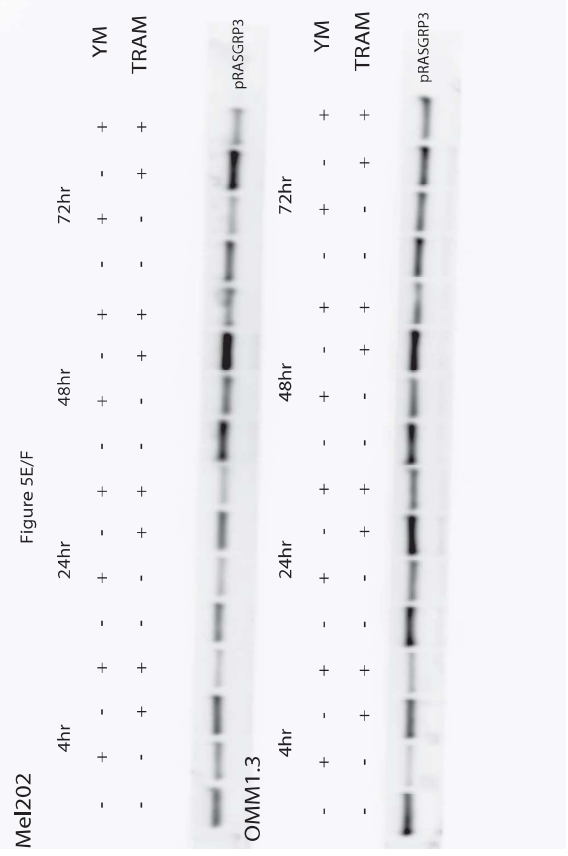

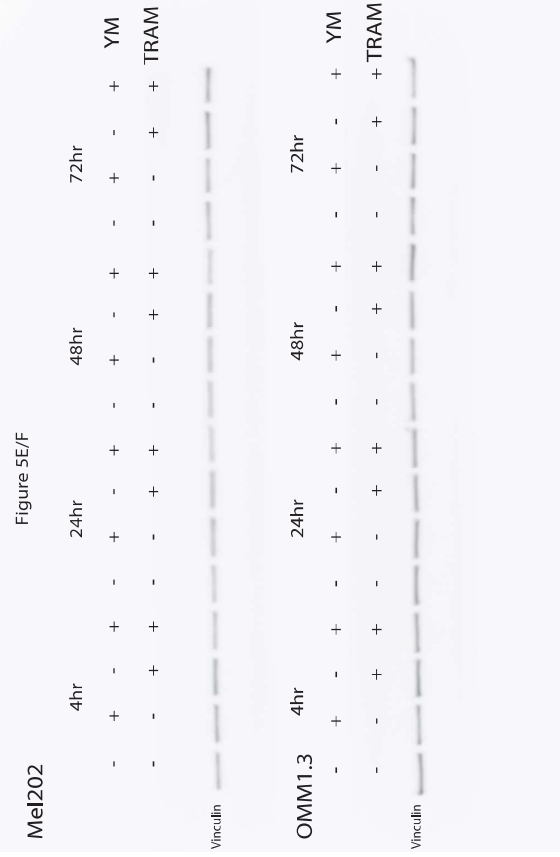

Figure 5G Cyclin D1

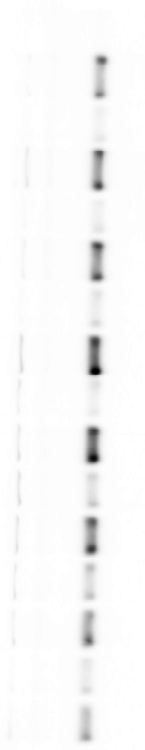

Figure 5G pCRAF

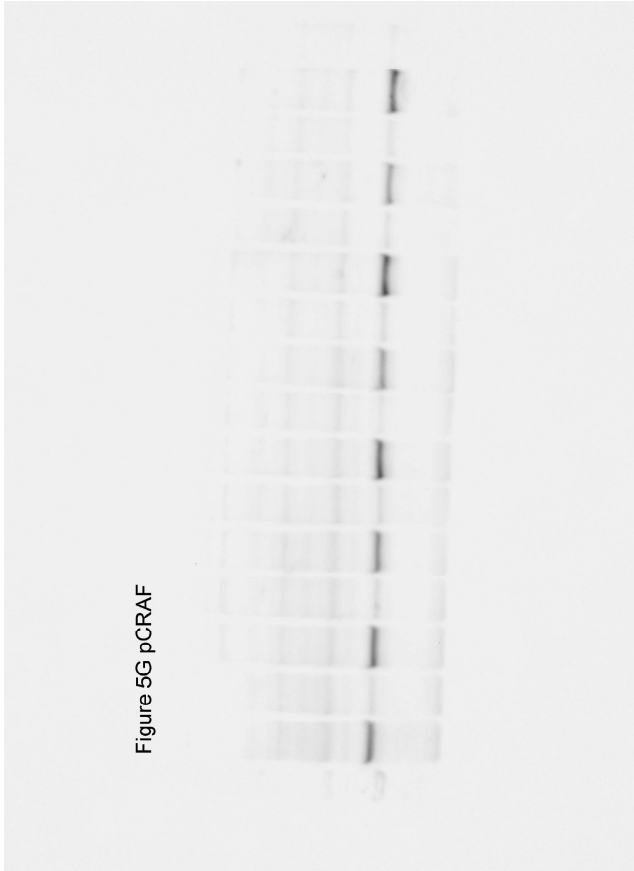

Figure 5G pERK

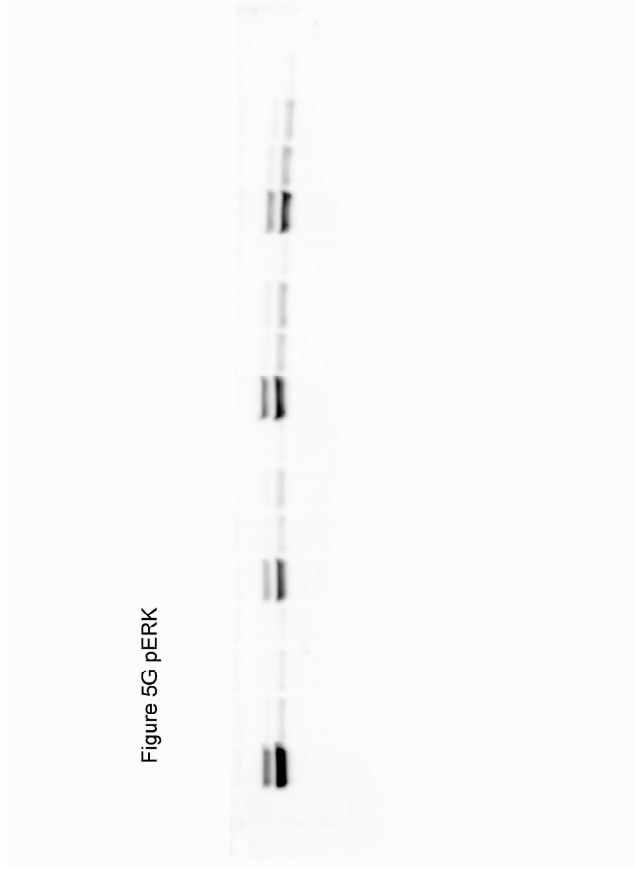



Figure 5G pMEK

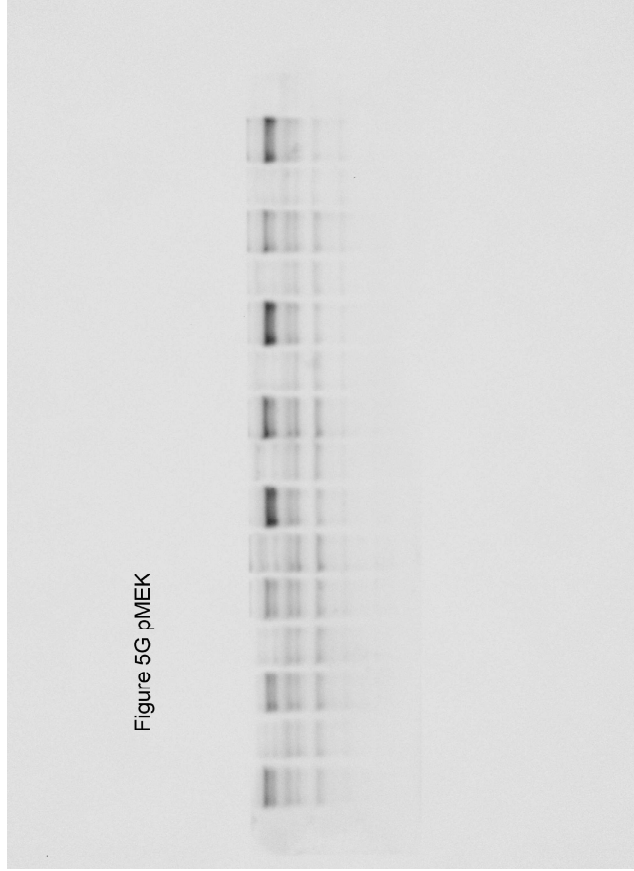

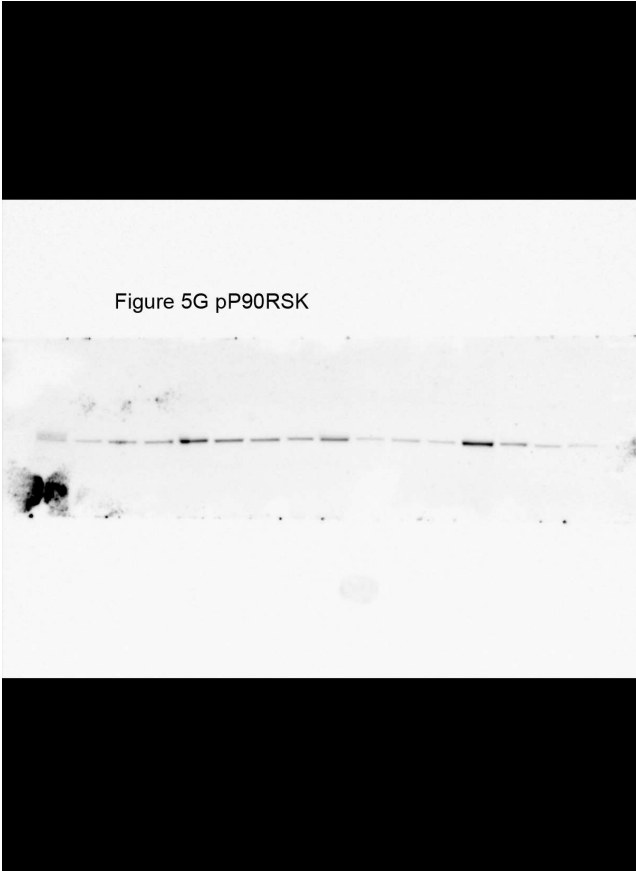

Figure 5G pRASGRP3

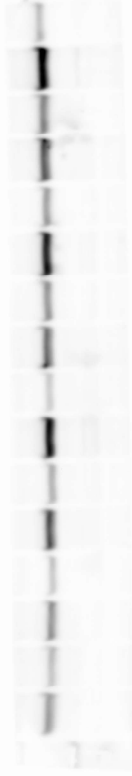

Figure 5G Vinculin

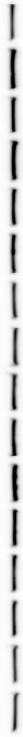

Figure 6D

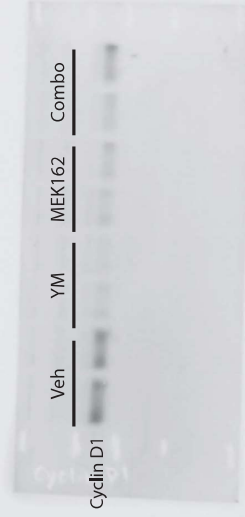

Figure 6D

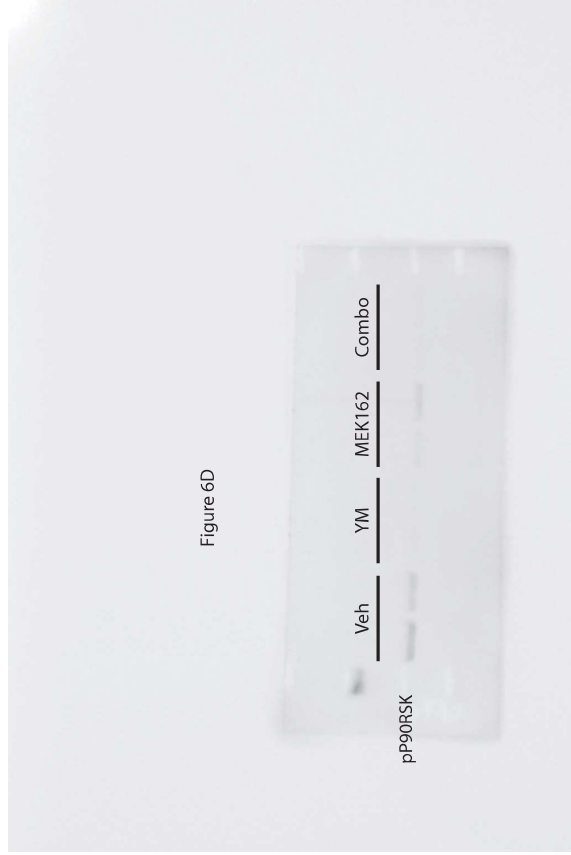

Figure 6D

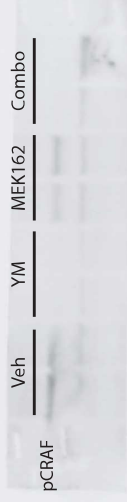

Figure 6D

pERK  
Veh      YM      MEK162      Combo

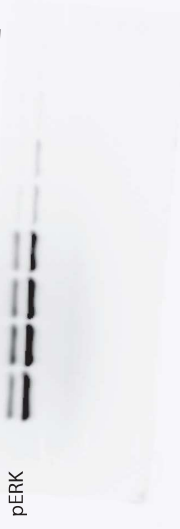



Figure 6D

pMEK

Veh      YM      MEK162      Combo

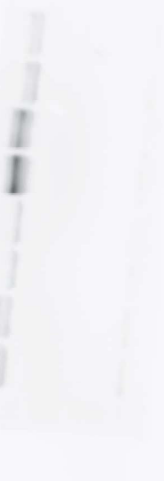

Figure 6D

Veh YM MEK162 Combo

pRASGRP3

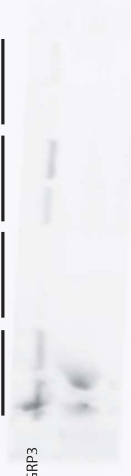

Figure 6D

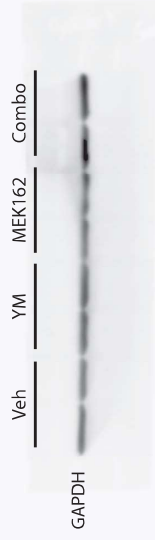

Figure 6F

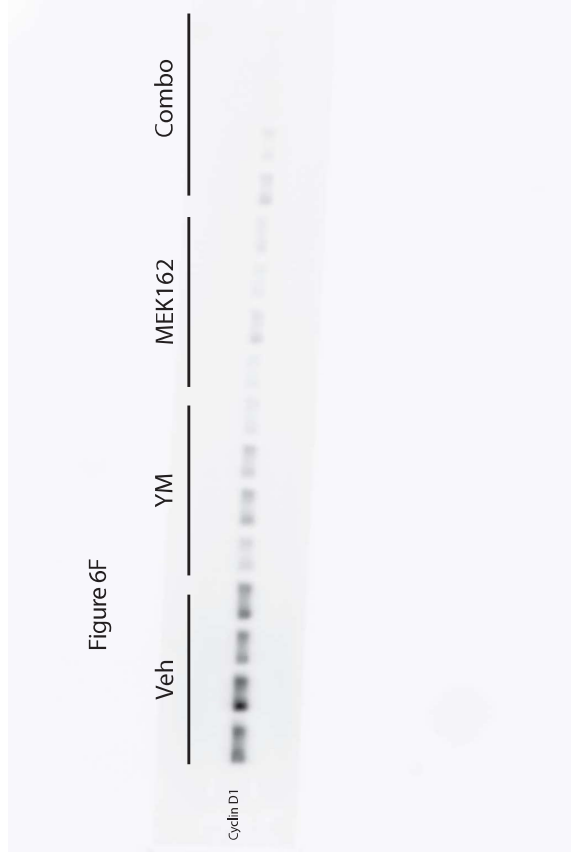

Figure 6F

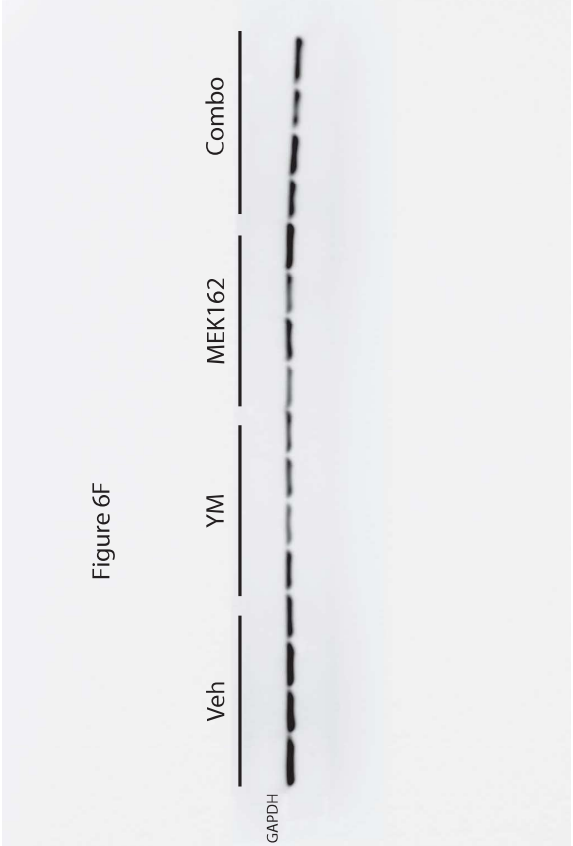

Figure 6F

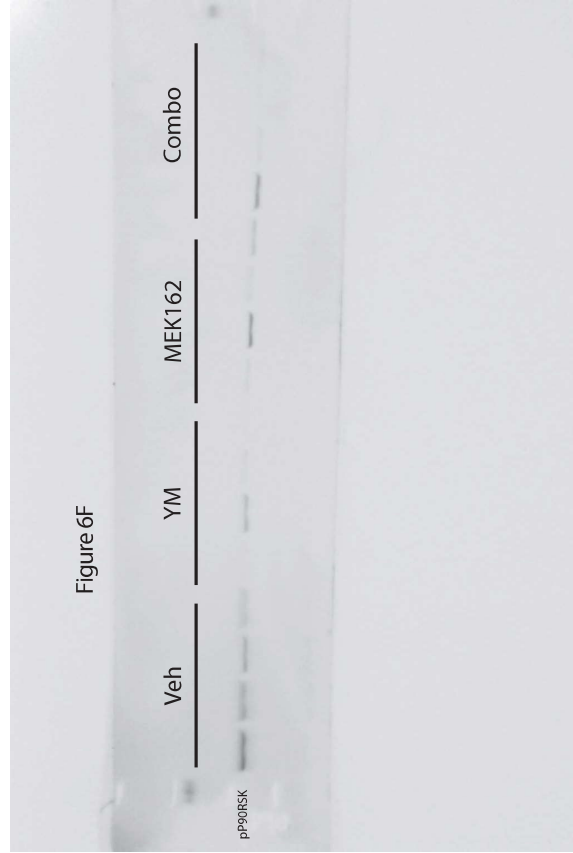

Figure 6F

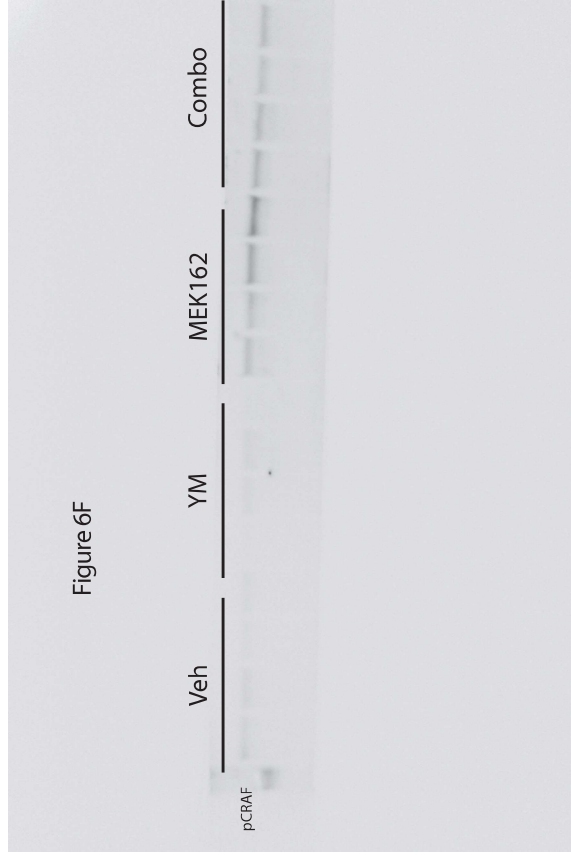

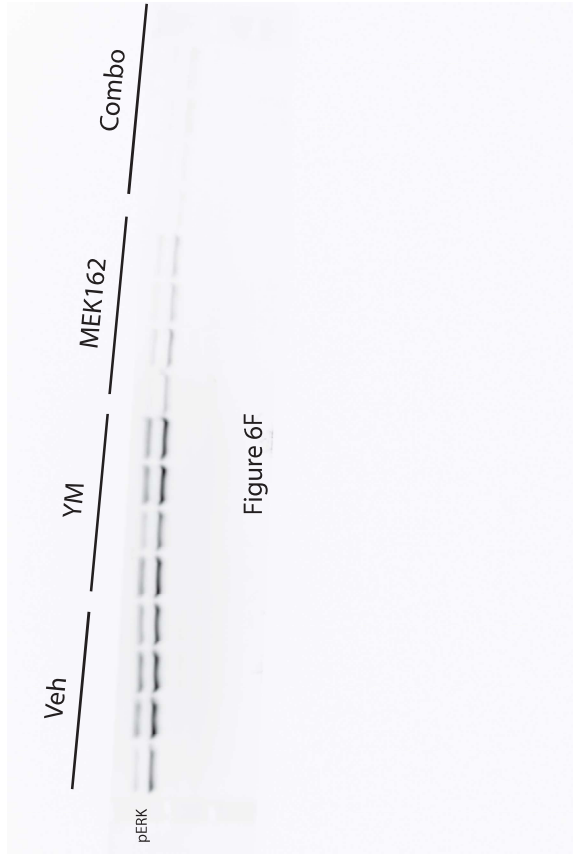

Figure 6F



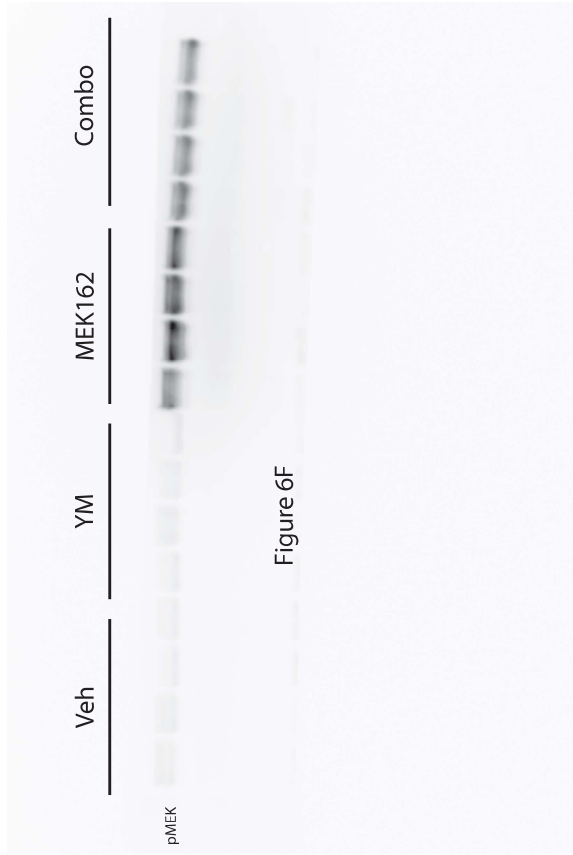

Figure 6F

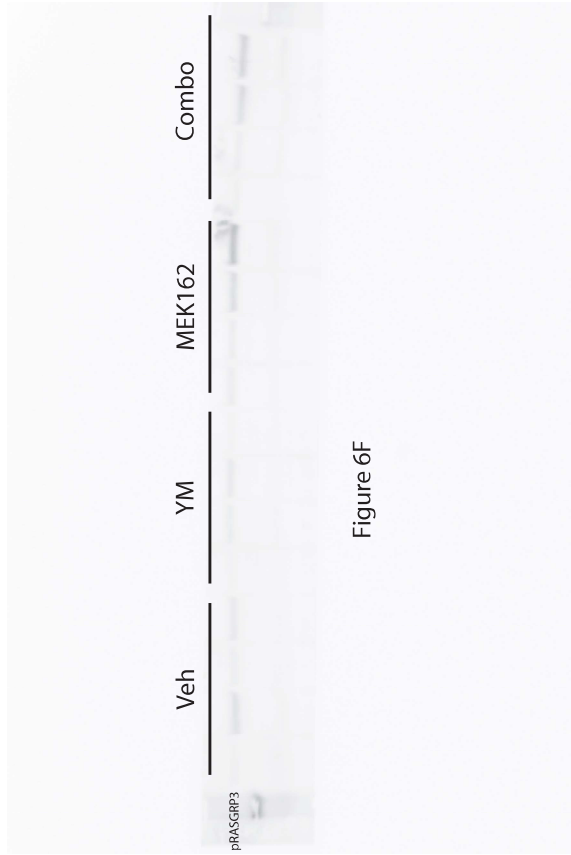

Figure 6F

Supplementary Figure 1F  
© 2020

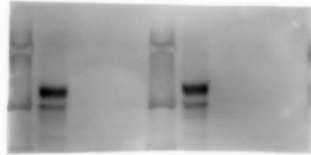

Supplementary Figure 1F  
DC~~2~~RP2

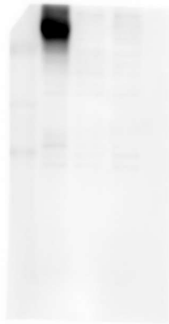

Supplementary Figure 1F  
MSE

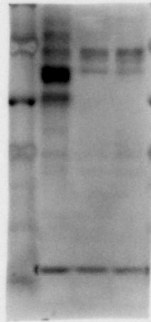

Supplementary Figure 1F  
IRASGRP3

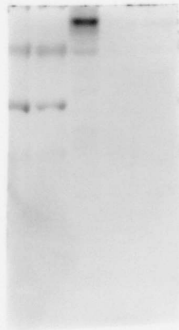

Supplementary Figure 1F  
Vinculin

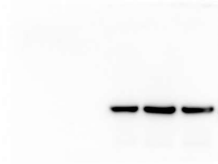

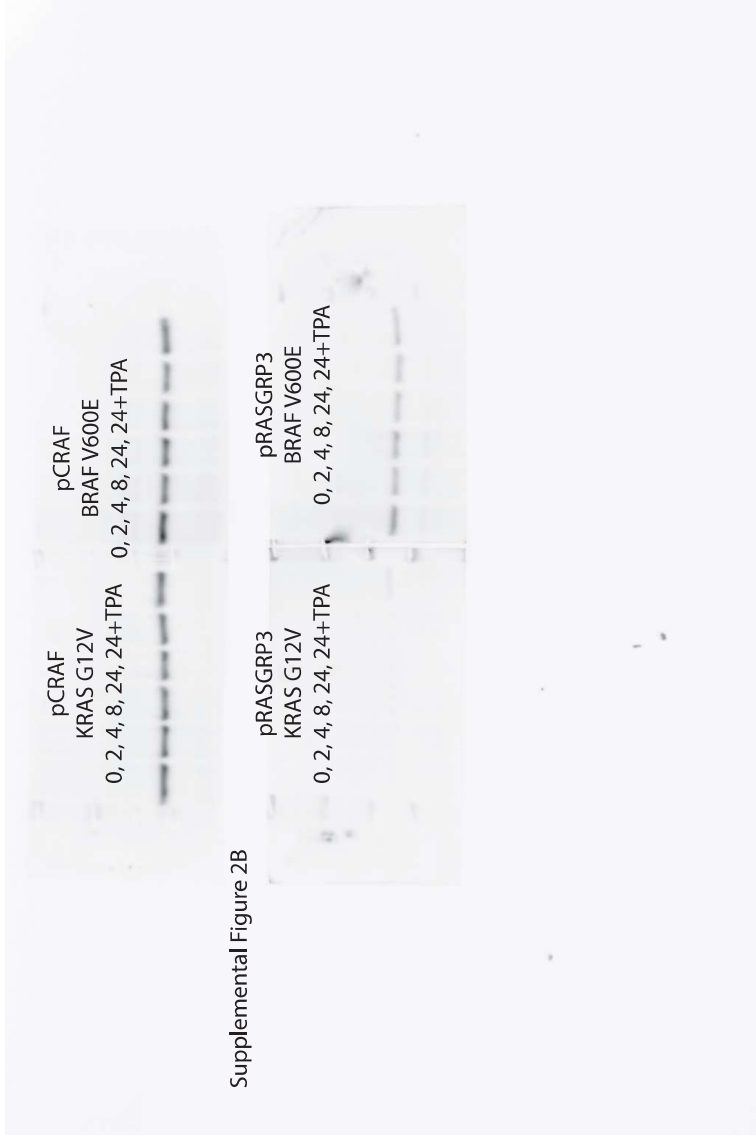

Supplemental Figure 2B



Supplemental Figure 2B

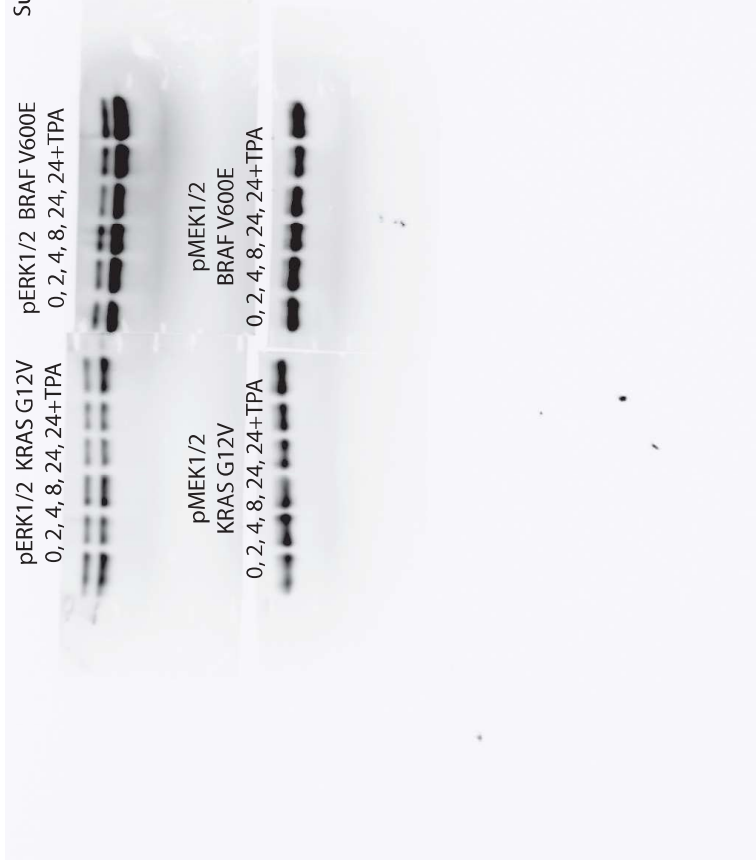

Supplemental Figure 2B

tERK1/2  
KRAS G12V  
0, 2, 4, 8, 24, 24+TPA

tERK1/2  
BRAF V600E  
0, 2, 4, 8, 24, 24+TPA

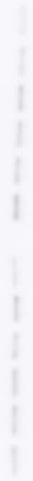

Supplemental Figure 2B

tMEK1/2  
KRAS G12V  
0, 2, 4, 8, 24, 24+TPA

tMEK1/2  
BRAF V600E  
0, 2, 4, 8, 24, 24+TPA

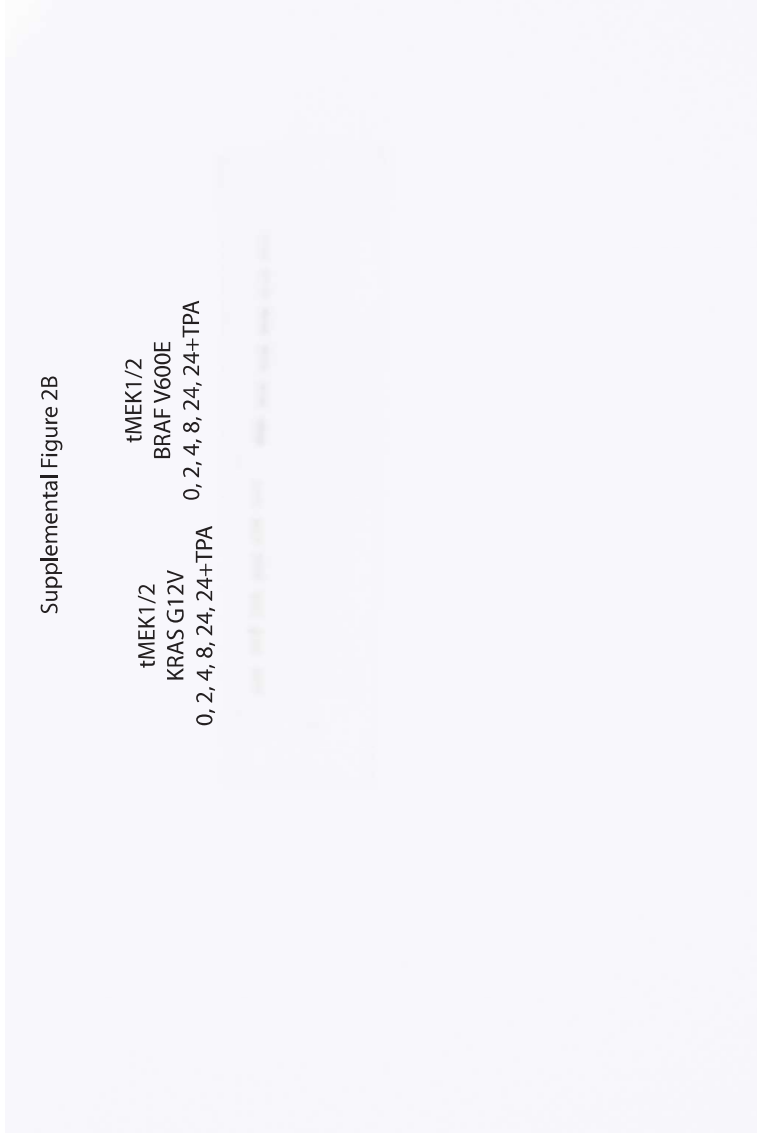

Supplemental Figure 2B

tRASGRP3  
KRAS G12V  
0, 2, 4, 8, 24, 24+TPA

tRASGRP3  
BRAF V600E  
0, 2, 4, 8, 24, 24+TPA

tCRAF  
KRAS G12V  
0, 2, 4, 8, 24, 24+TPA

tCRAF  
BRAF V600E  
0, 2, 4, 8, 24, 24+TPA

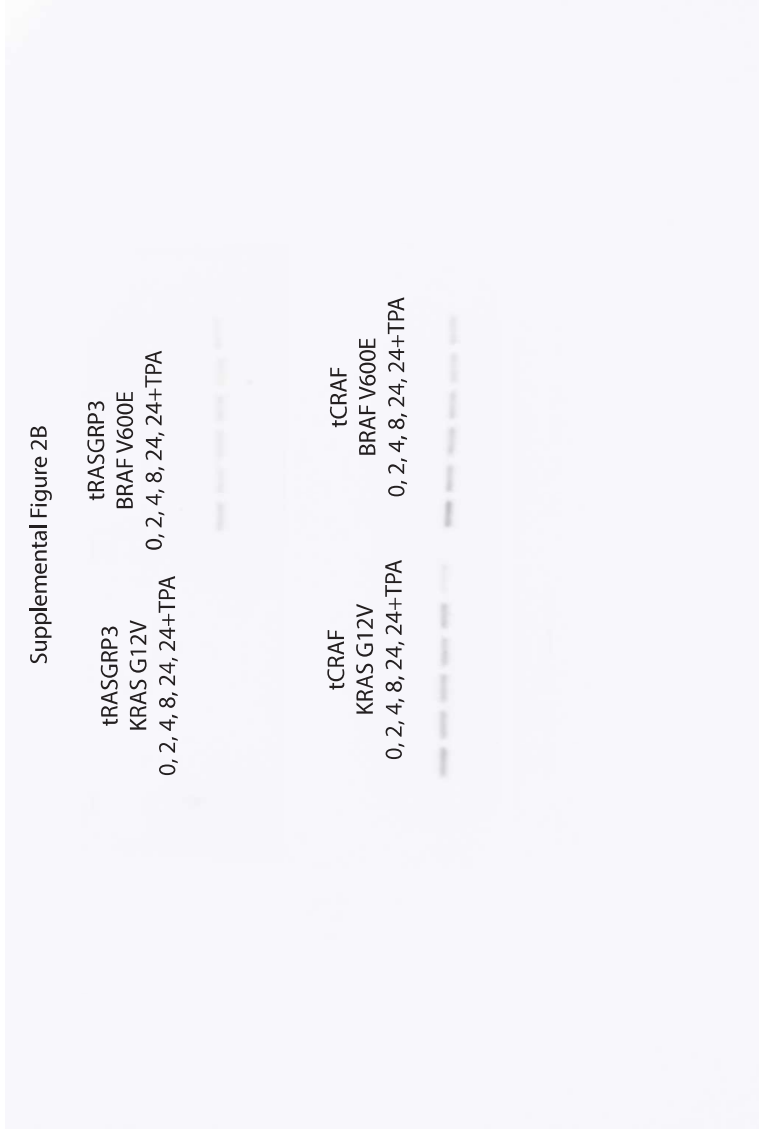

Supplemental Figure 2B

Cyclin D1  
KRAS G12V  
0, 2, 4, 8, 24, 24+TPA

Cyclin D1  
BRAF V600E  
0, 2, 4, 8, 24, 24+TPA

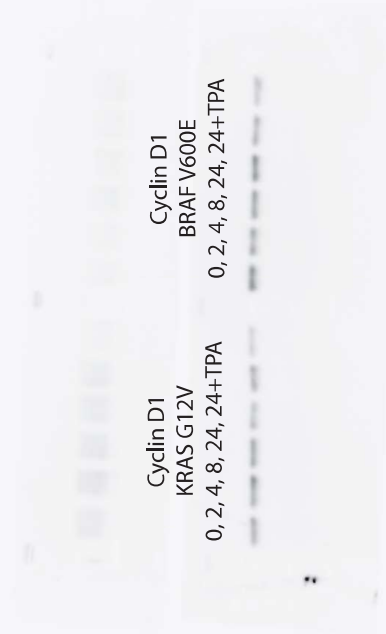

Supplementary Figure 2B  
NRAS Q61K  
cyclin D1

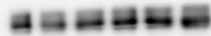

Supplementary Figure 2B  
NRAS Q61K  
GAPD

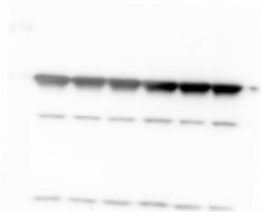

Supplementary Figure 2B  
NRAS Q61K  
pCRAF

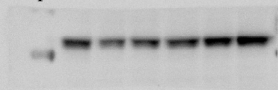



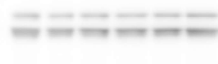

Supplementary Figure 2B  
NRAS Q61K  
pERK

Supplementary Figure 2B  
NRAS Q61K  
pMEK

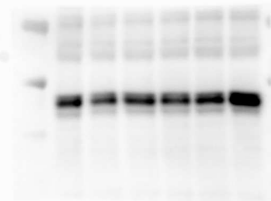

Supplementary Figure 2B  
NRAS Q61K  
pRASGRP3

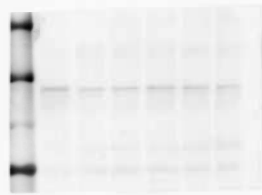

Supplementary Figure 2B  
NRAS Q61K  
tCRAF

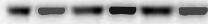

Supplementary Figure 2B  
NRAS Q61K  
pERK

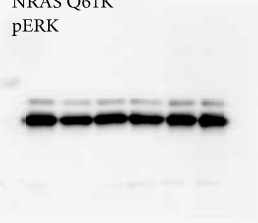

Supplementary Figure 2B  
NRAS Q61K  
tMEK

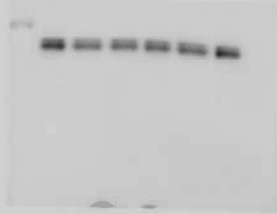

Supplementary Figure 2B  
NRAS Q61K  
tRASGRP3

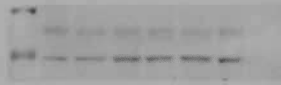

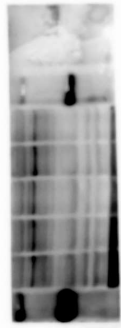



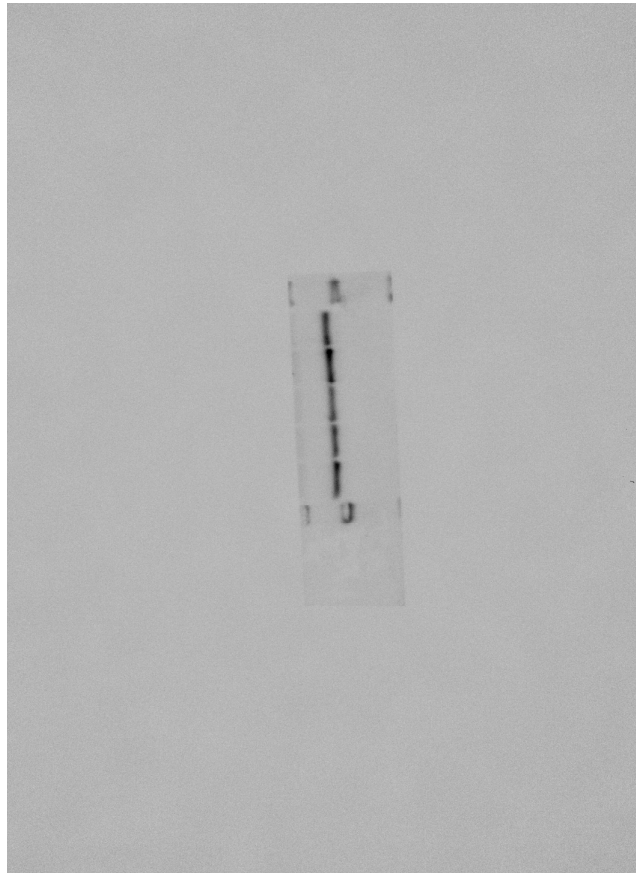

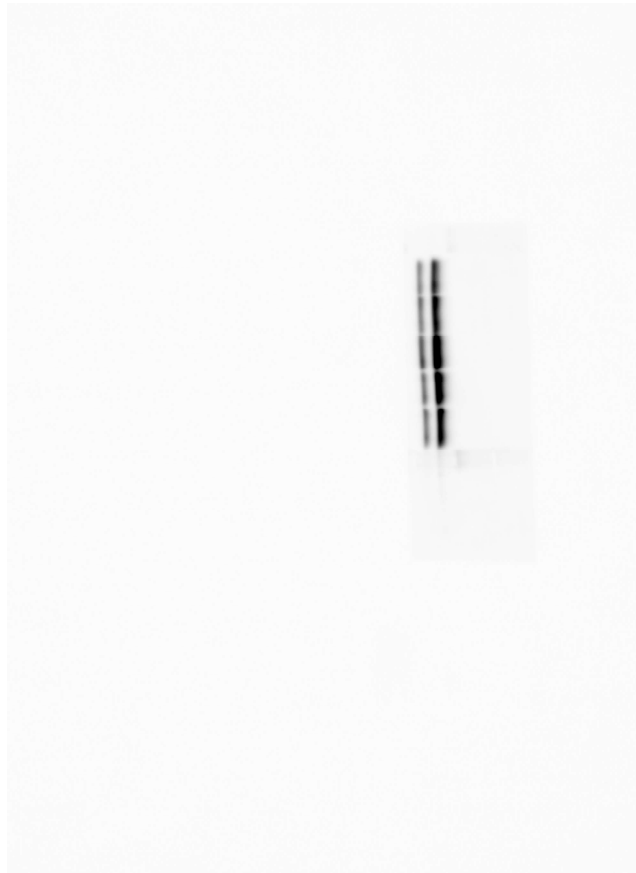

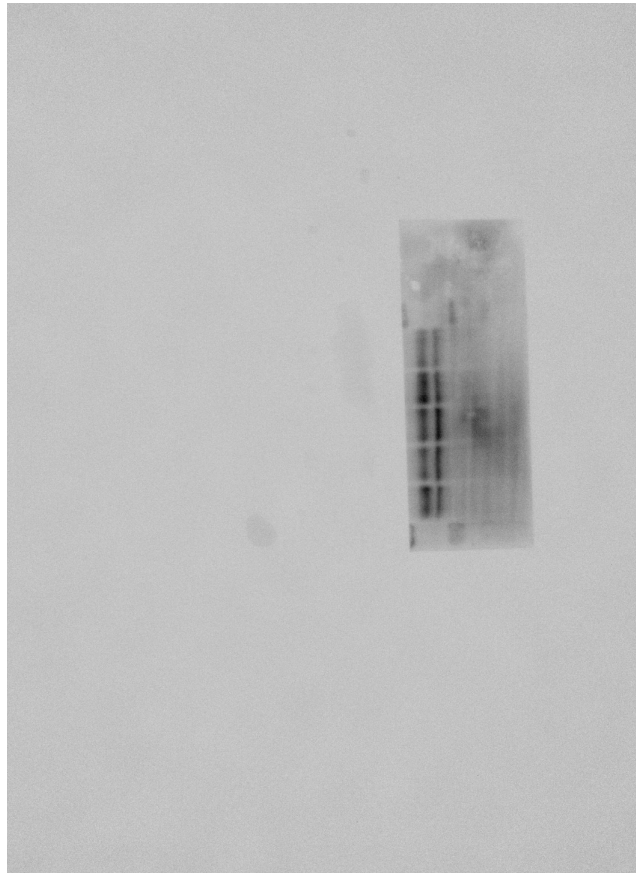

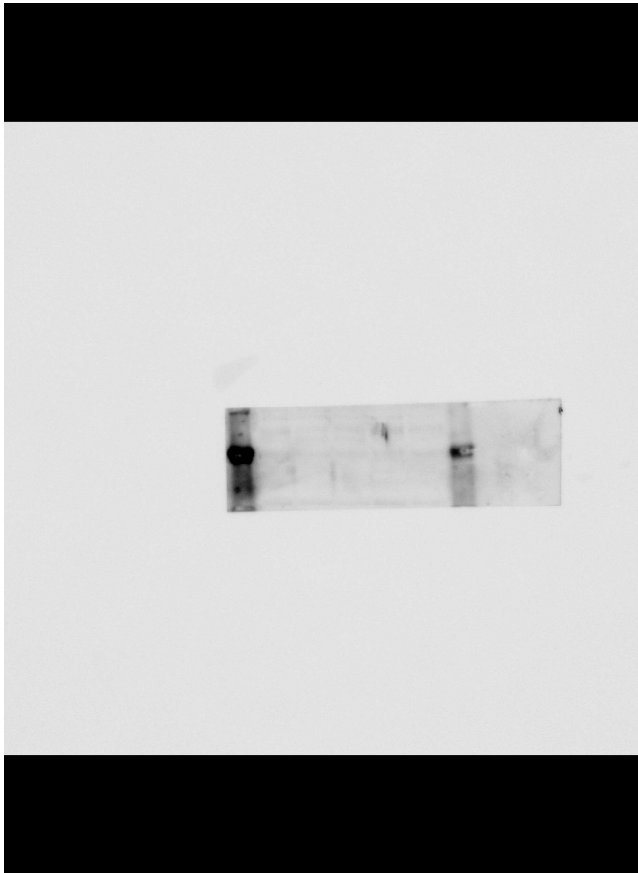

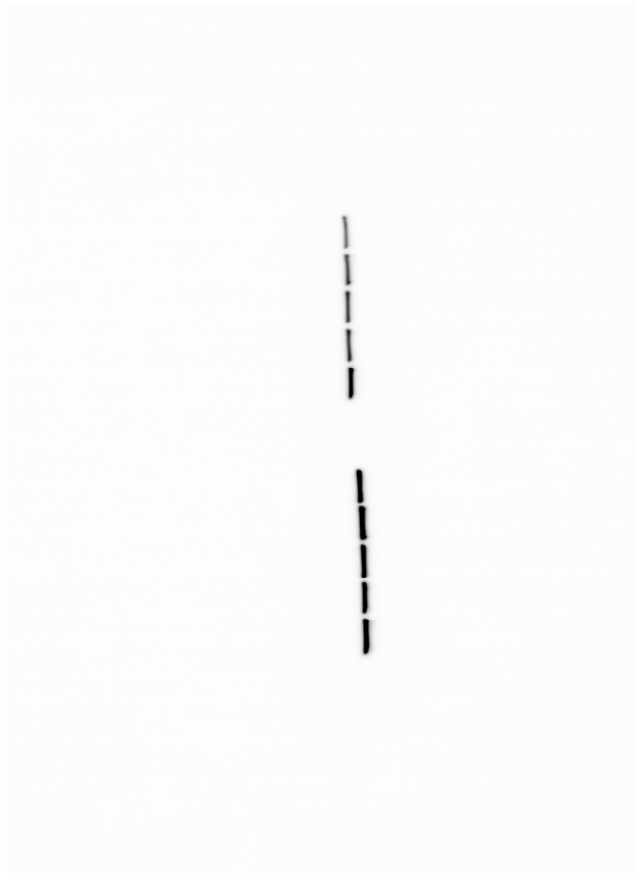

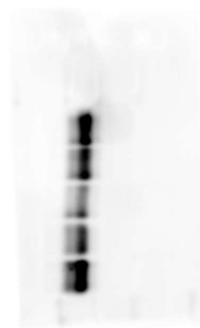

Supplementary Figure 2E GNAQ Q209L KRAS G12V Cyclin D1

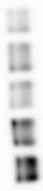

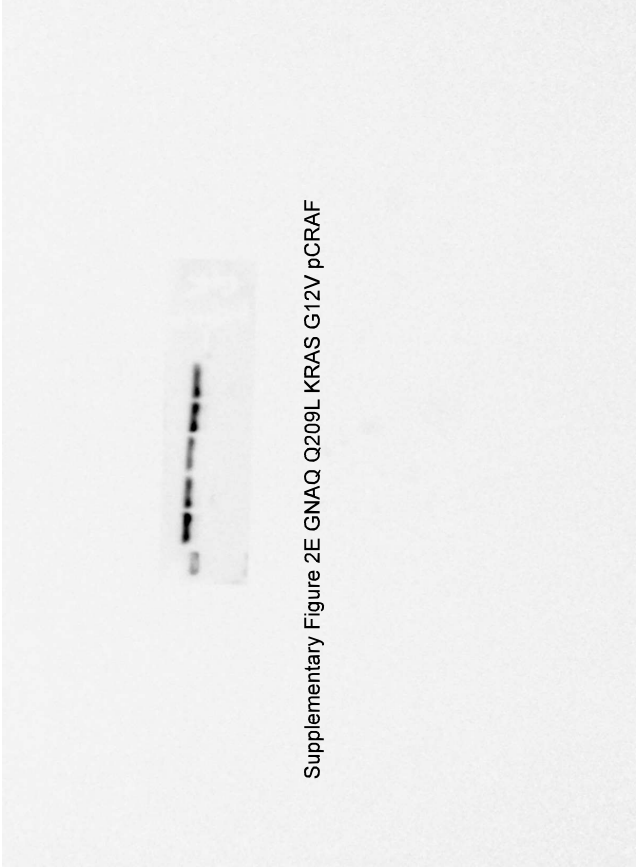

Supplementary Figure 2E GNAQ Q209L KRAS G12V pCRAF



Supplementary Figure 2E GNAQ Q209L KRAS G12V pERK

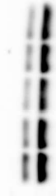

Supplementary Figure 2E GNAQ Q209L KRAS G12V pMEK

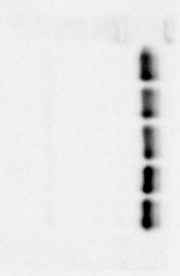

Supplementary Figure 2E GNAQ Q209L KRAS G12V pP90RSK

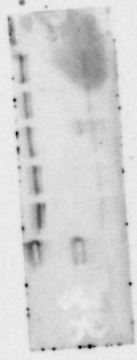

Supplementary Figure 2E GNAQ Q209L KRAS G12V pRASGRP3

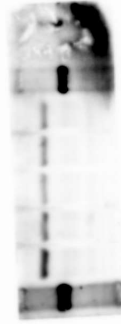

Supplementary Figure 2E GNAQ Q209L KRAS G12V Vinculin

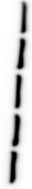

Supplementary Figure 3B MP41  
Cyclin D1

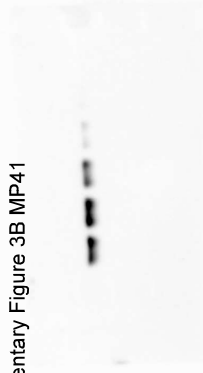

Supplementary Figure 3B MP41  
pCRAF

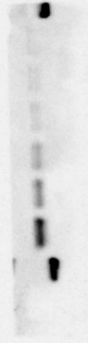

Supplementary Figure 3B MP41  
pERK

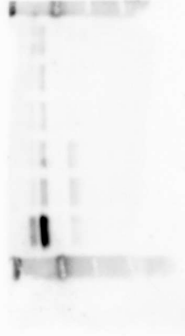



Supplementary Figure 3B MP41  
pMEK

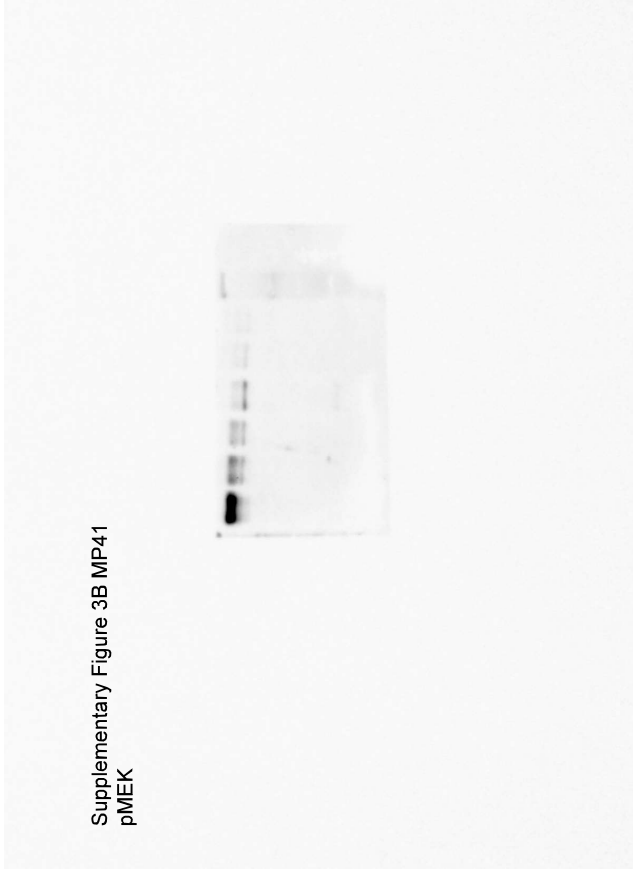

Supplementary Figure 3B MP41  
pRASGRP3

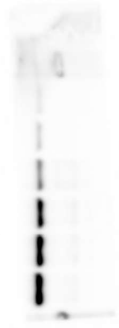

Supplementary Figure 3B MP41  
Vinculin

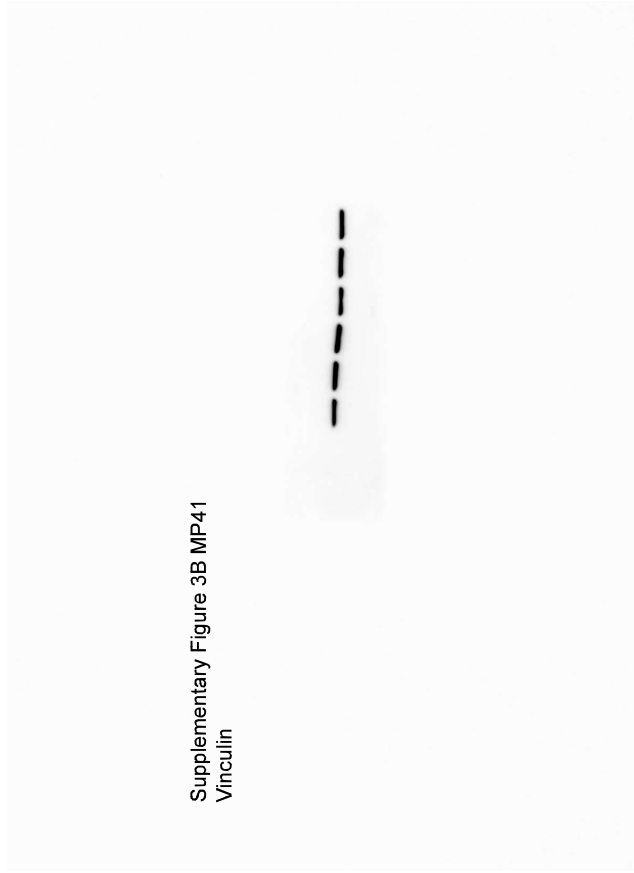

Supplementary Figure 3B  
OMM1  
Cyclin D1

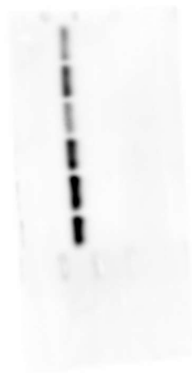

Supplementary Figure 3B

OMM1

pCRAF

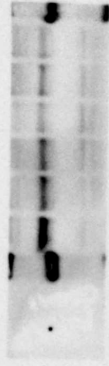

Supplementary Figure 3B  
OMM1  
pERK

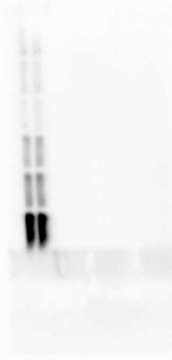

Supplementary Figure 3B  
OMM1  
pMEK

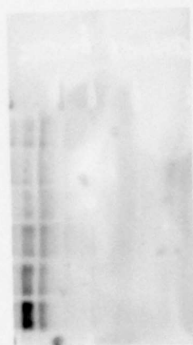

Supplementary Figure 3B  
OMM1  
pRASGRP3

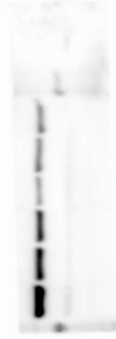



Supplementary Figure 3B  
OMM1  
Vinc

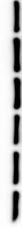

Supplementary Figure 3G MeI202 NRAS Q61K  
Cyclin D1

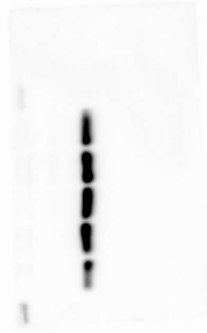

Supplementary Figure 3G Mel202 NRAS Q61K  
pCRAF

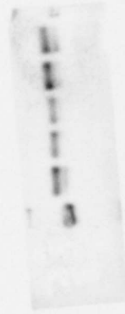

Supplementary Figure 3G MeI202 NRAS Q61K  
pERK

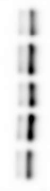

Supplementary Figure 3G Mel202 NRAS Q61K  
pMEK

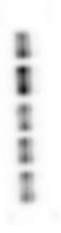

Supplementary Figure 3G Mei202 NRAS Q61K  
pF90RSK

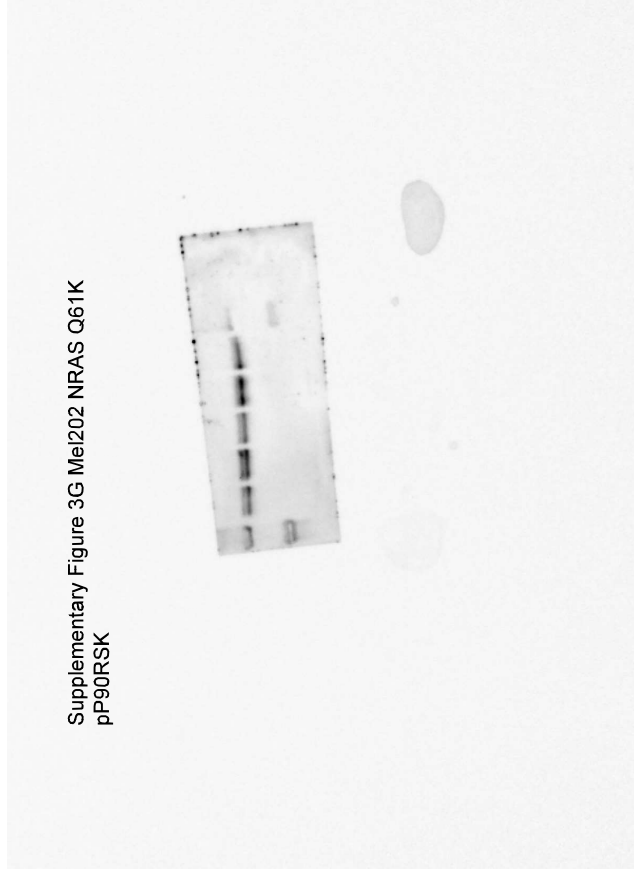

Supplementary Figure 3G Mel202 NRAS Q61K  
pRASGRP3

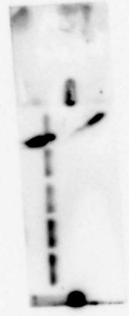

Supplementary Figure 3G Me202 NRAS Q61K  
Vinculin

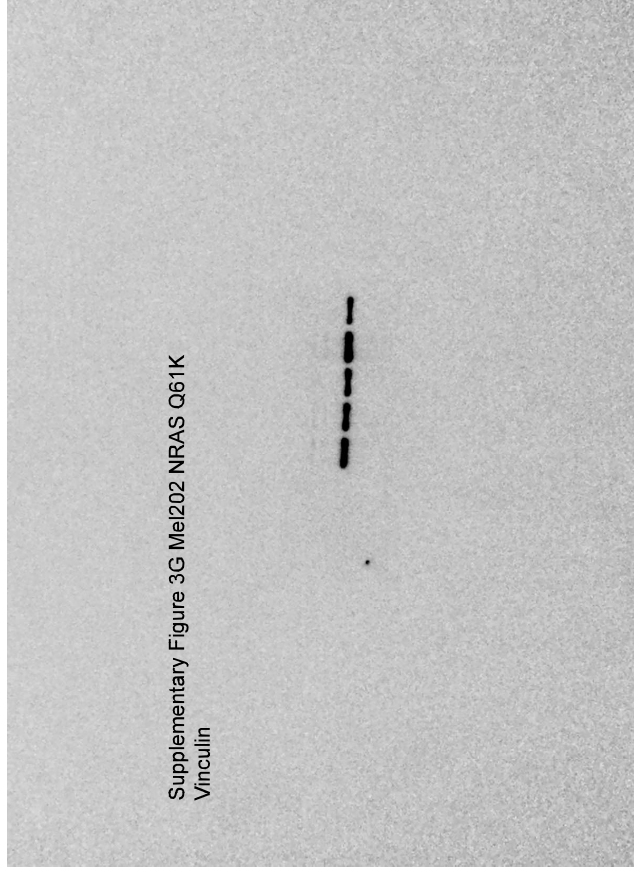



Supplementary Figure 3G OMM1.3 MEKDD  
Cyclin D1

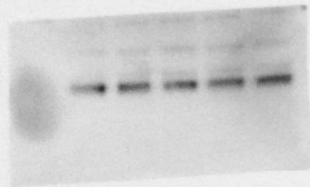

Supplementary Figure 3G OMM1.3 MEKDD  
pCRAF

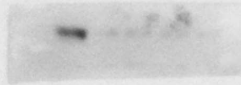

Supplementary Figure 3G OMM1.3 MEKDD  
pERK

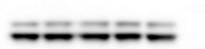

Supplementary Figure 3G OMM1.3 MEKDD  
pMEK

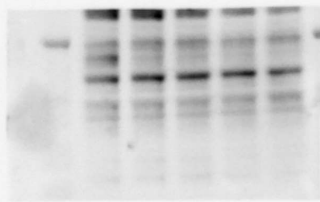

Supplementary Figure 3G OMM1.3 MEKDD  
pP90RSK

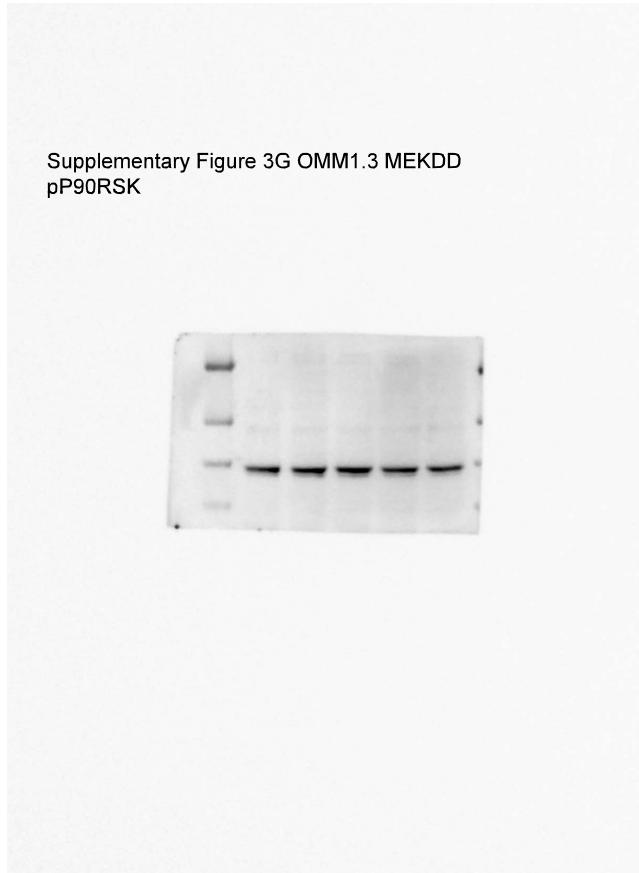

Supplementary Figure 3G OMM1.3 MEKDD  
pRASGRP3

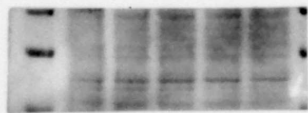

Supplementary Figure 3G OMM1.3 MEKDD  
Vinculin

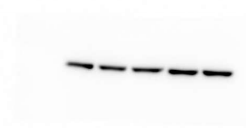

Supplementary Figure 3G OMM1.3 NRAS Q61K  
Cyclin D1

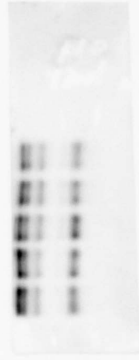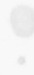



Supplementary Figure 3G OMM1.3 NRAS Q61K  
pGRAF

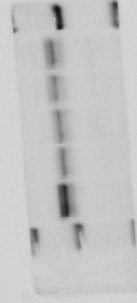

Supplementary Figure 3G OMM1.3 NRAS Q61K  
pERK

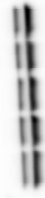

Supplementary Figure 3G OMM1.3 NRAS Q61K  
pMEK

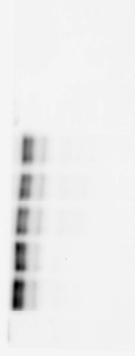

Supplementary Figure 3G OMM1.3 NRAS Q61K  
pP90RSK

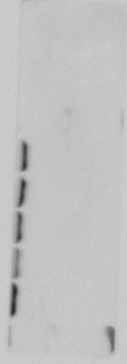

Supplementary Figure 3G OMM1.3 NRAS Q61K  
pRASGRP3

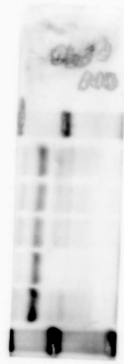

Supplementary Figure 3G OMM1.3 NRAS Q61K  
Vinculin

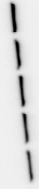

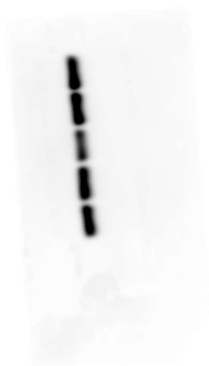

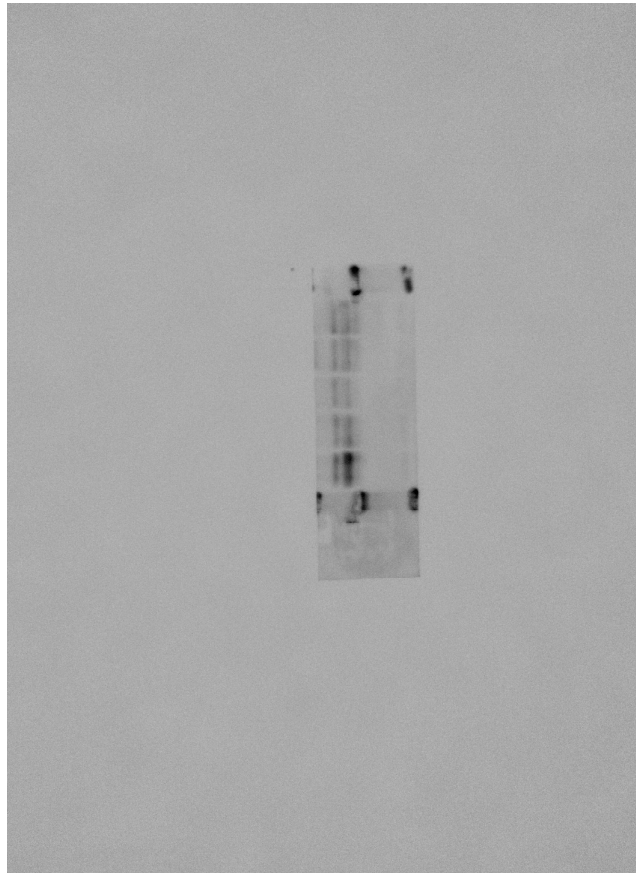



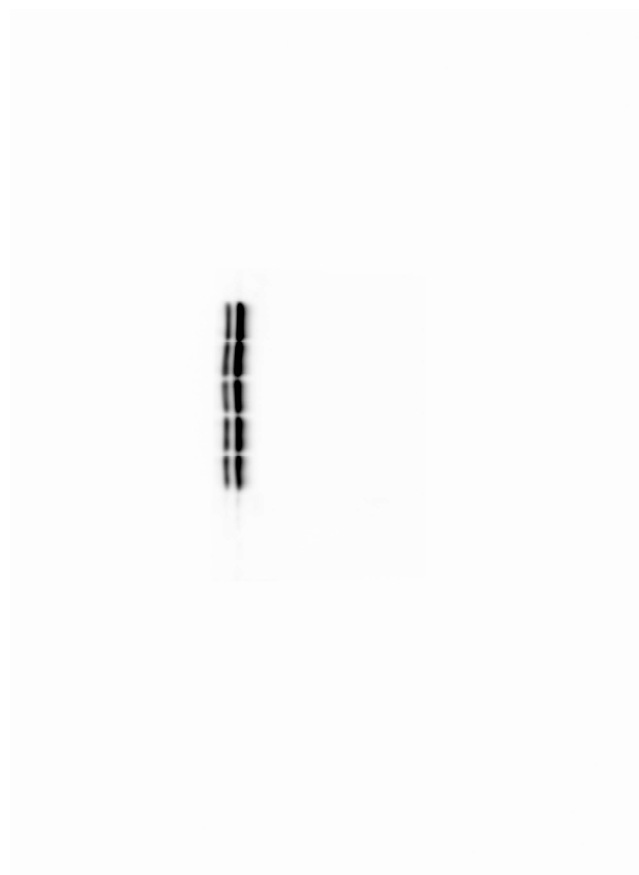

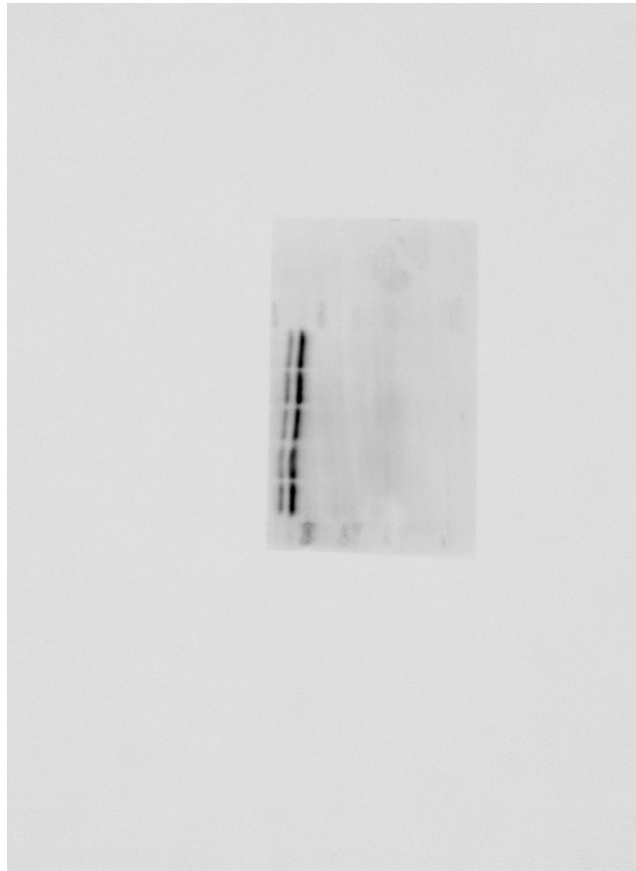

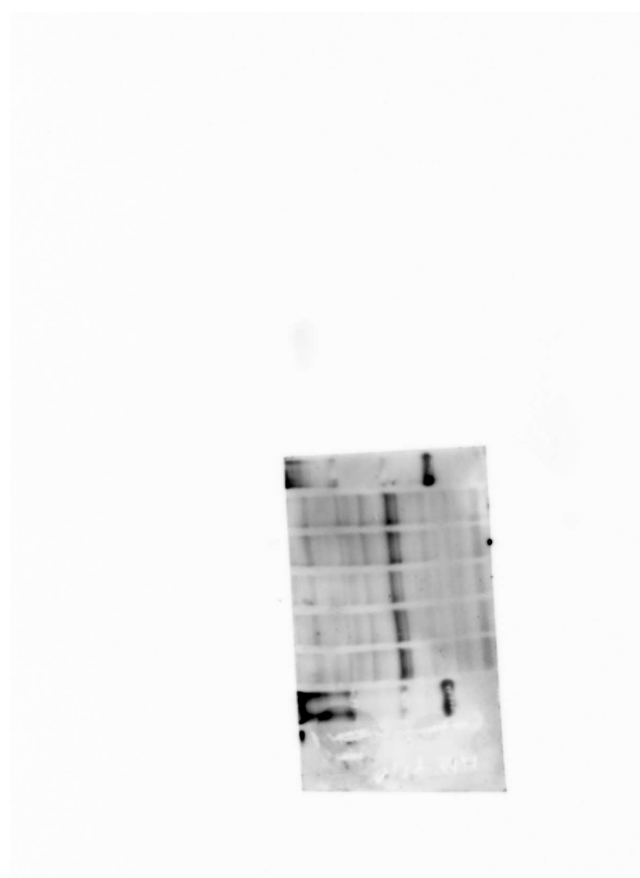

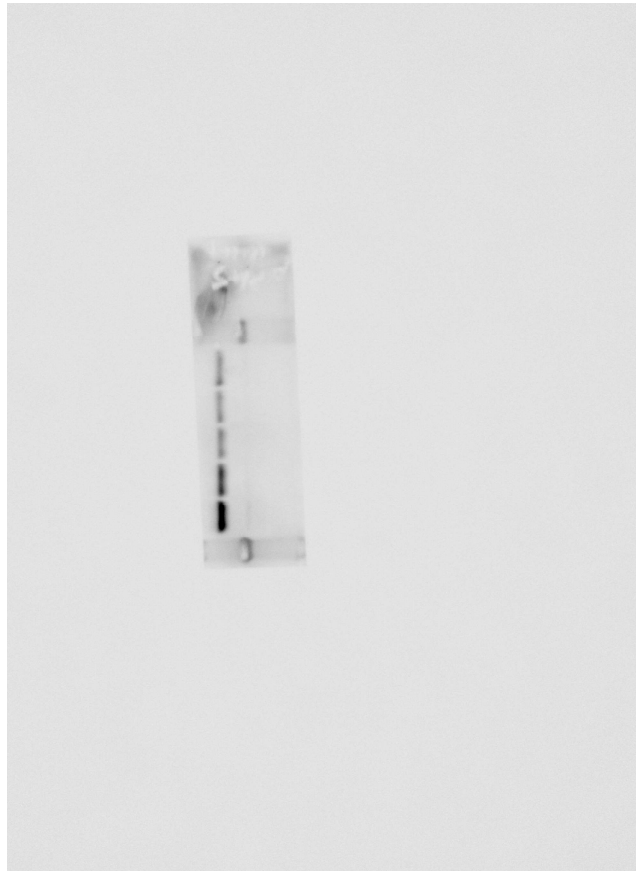

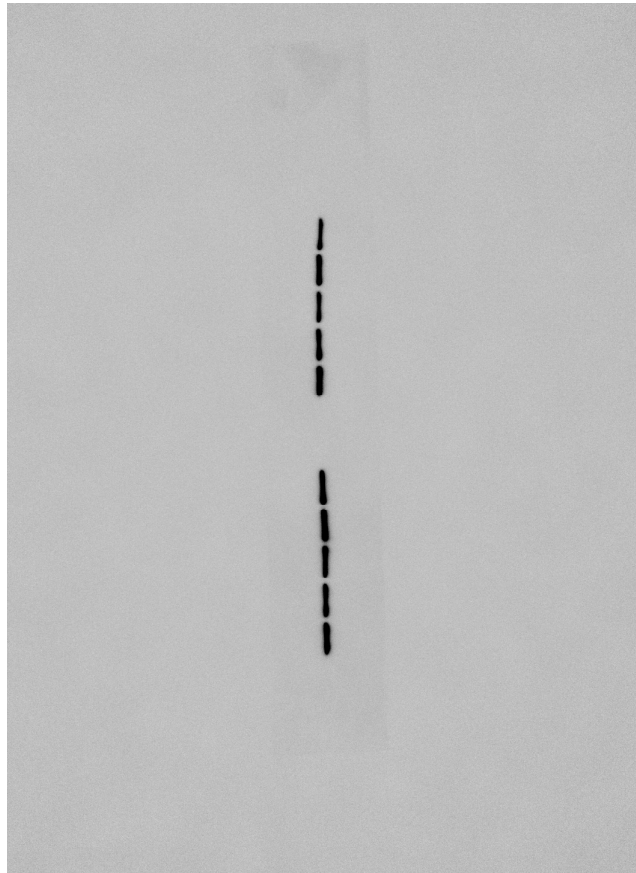

Supplementary Figure 5F OMM1.3 KRAS G12V  
Cyclin D1

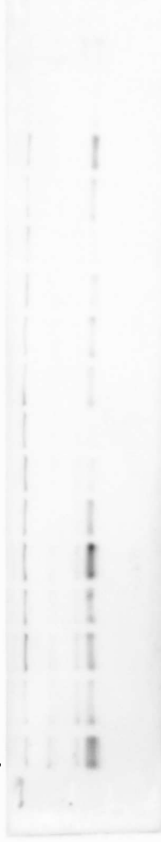

Supplementary Figure 5F OMM1.3 KRAS G12V  
pCRAF

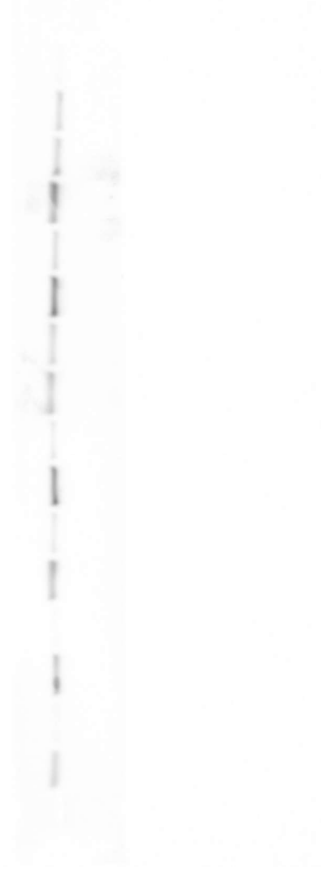

Supplementary Figure 5F OMM1.3 KRAS G12V  
pERK

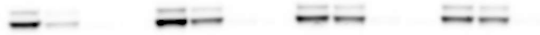



Supplementary Figure 5F OMM1.3 KRAS G12V  
pMEK

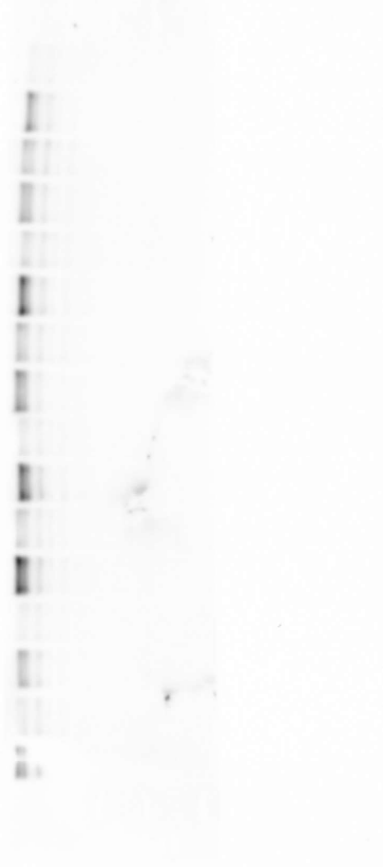

Supplementary Figure 5F OMM1.3 KRAS G12V  
pP90RSK

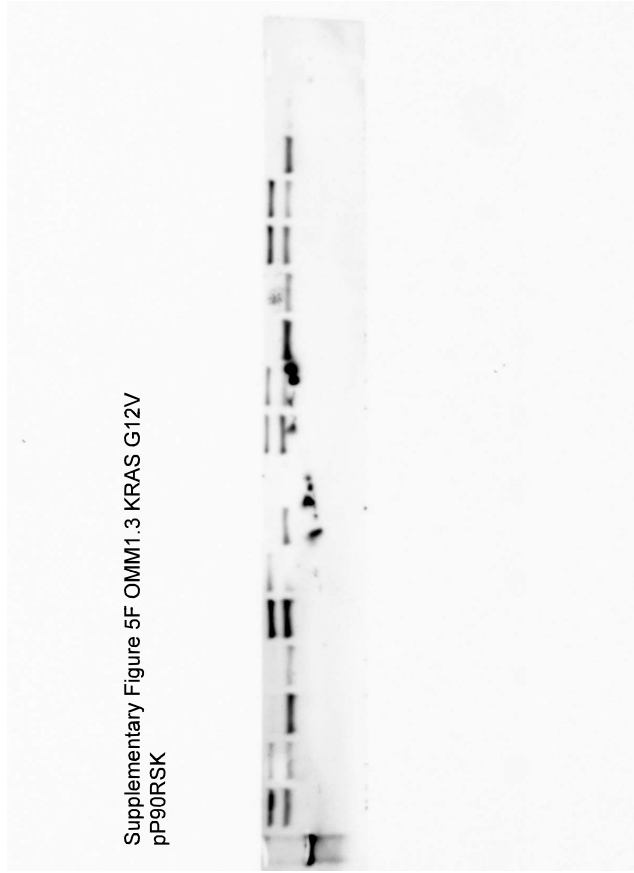

Supplementary Figure 5F OMM1.3 KRAS G12V  
pRASGRP3

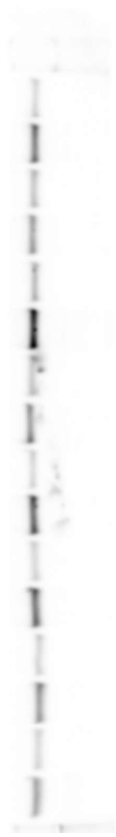

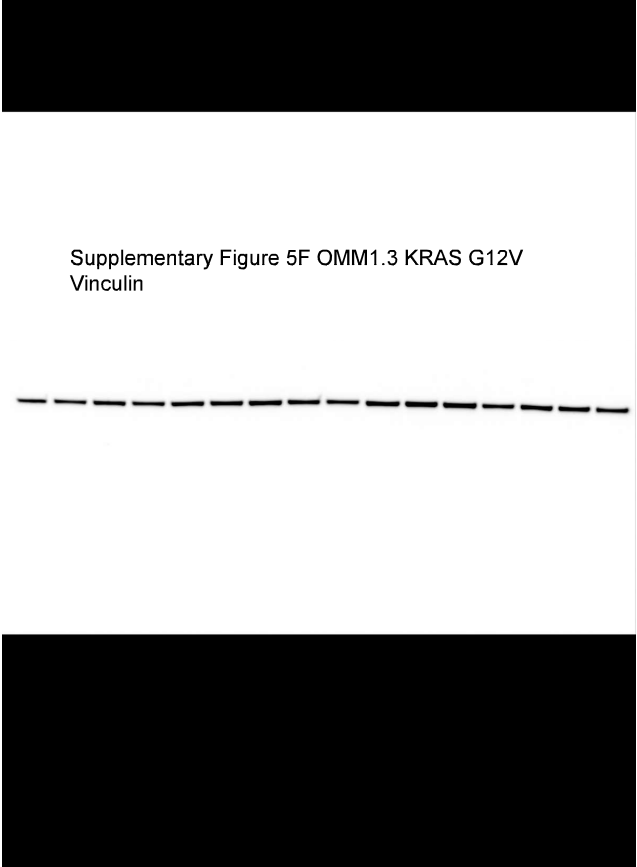

Supplementary Figure 5F OMM1.3 KRAS G12V  
Vinculin
