# Supplementary material
Source: PubMed Central journal article supplement (PMC8086191)
Supplement: NIHMS1649690-supplement-Supplementary_Figures_S1-S6.pdf [file NIHMS1649690-supplement-Supplementary_Figures_S1-S6.pdf]

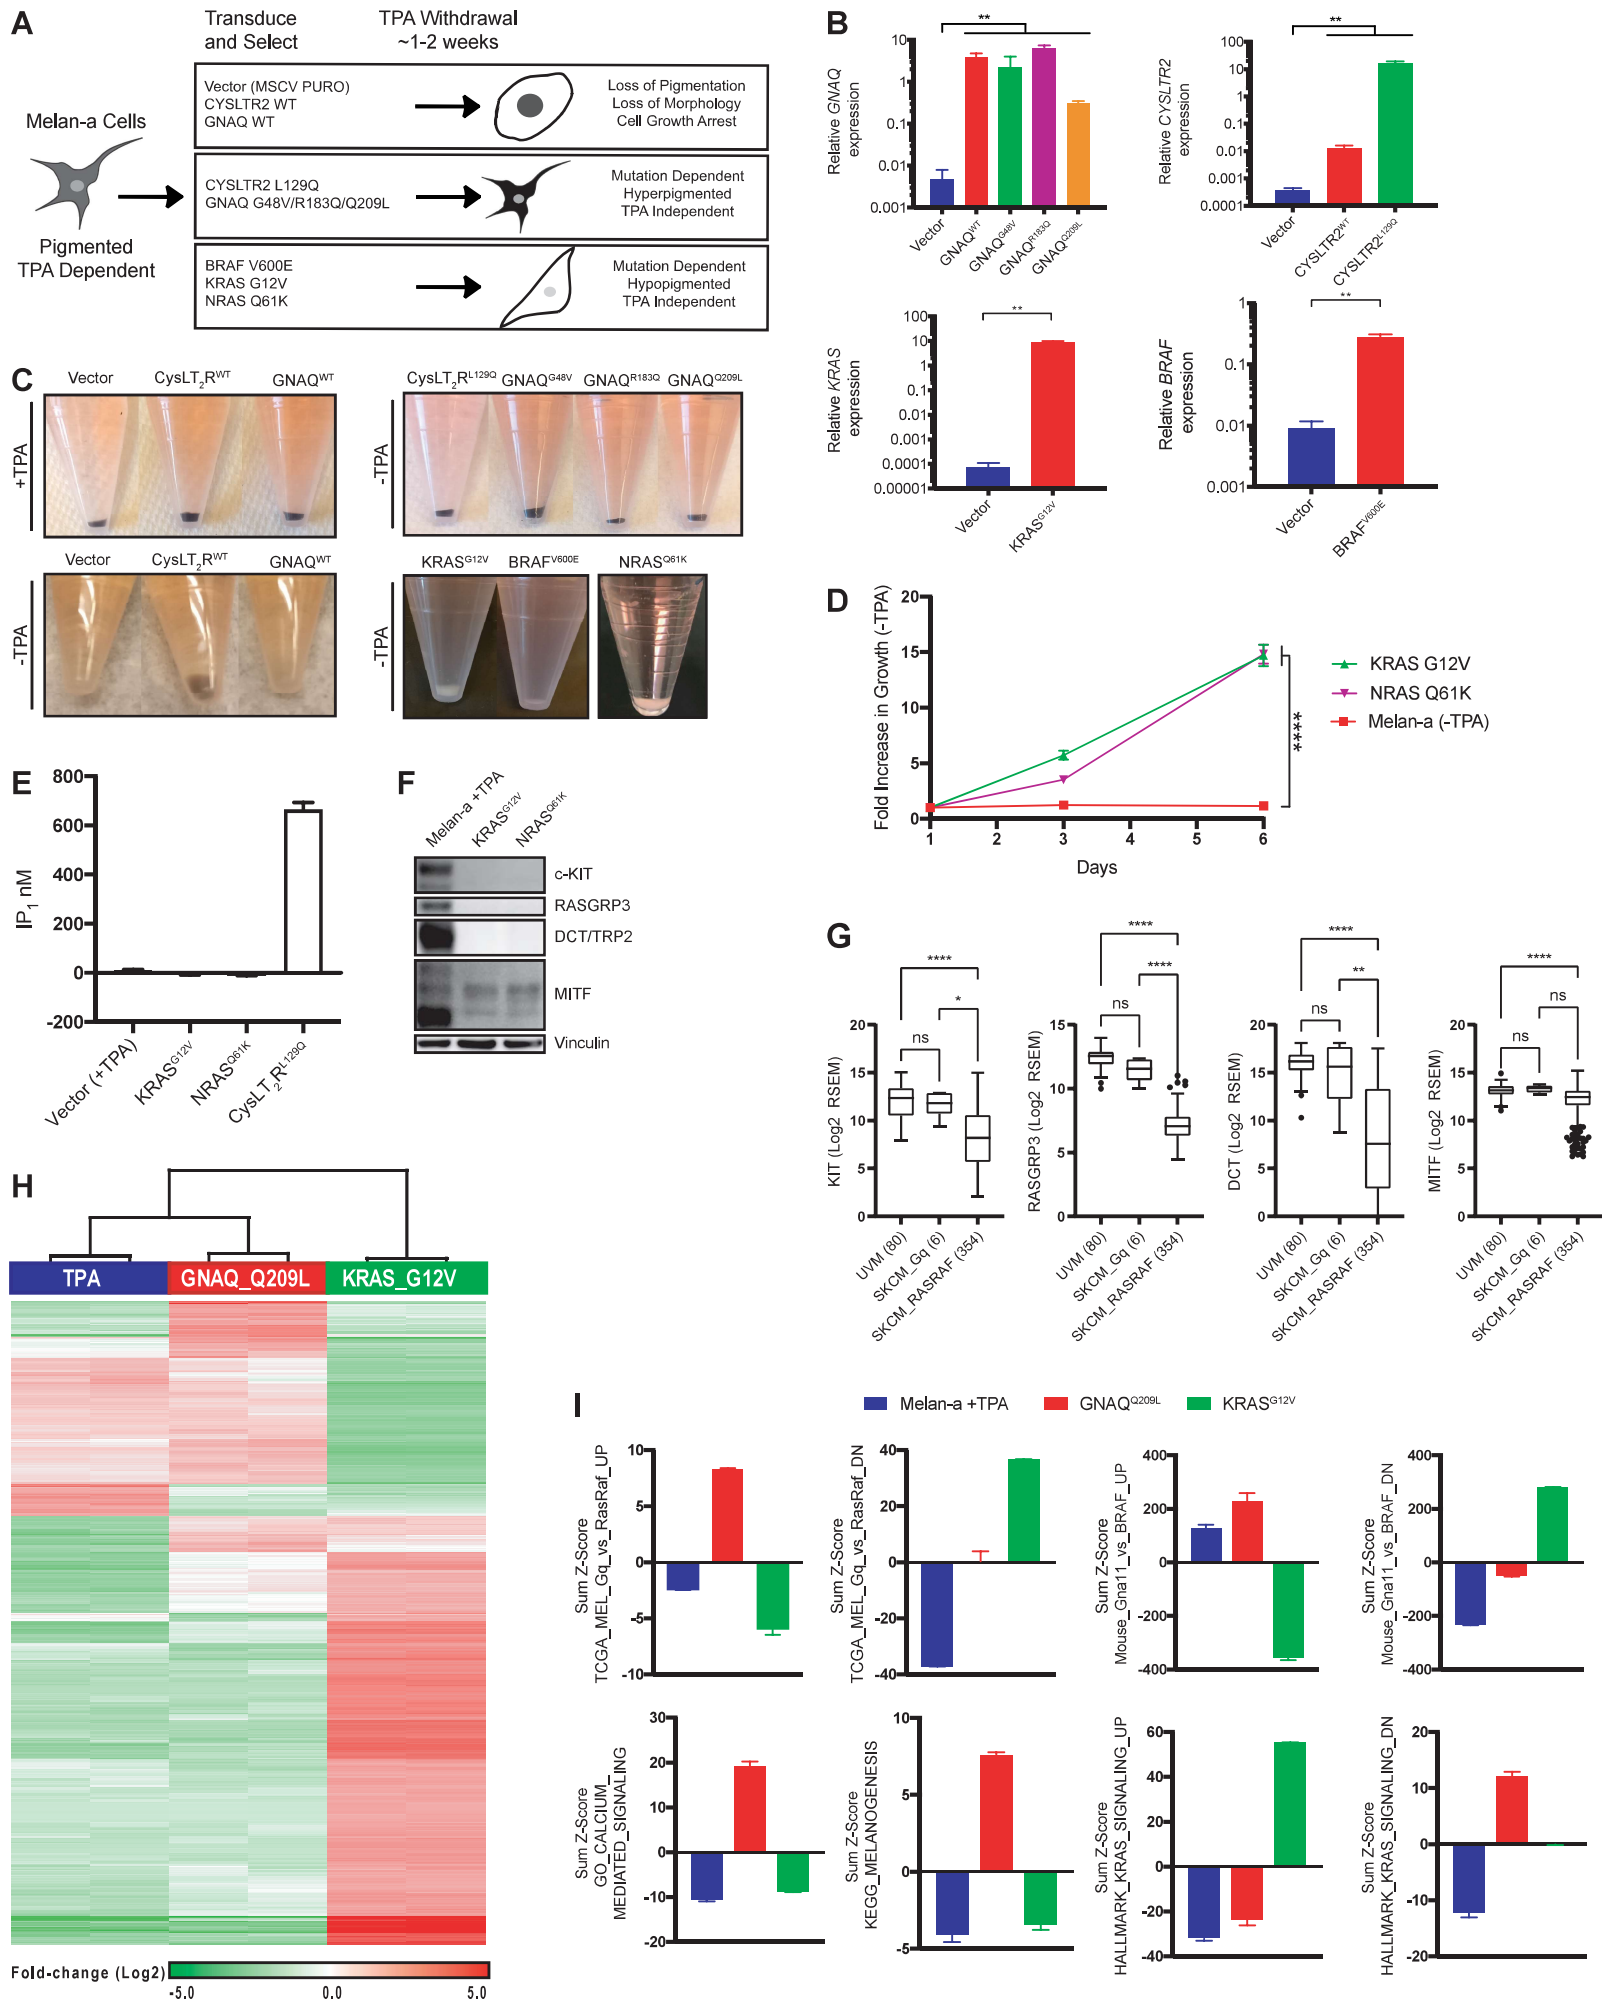

**Supplementary Figure 1. (A)** Workflow diagram of generating mutation dependent melan-a cells. Cells were transduced with vector control (MSCV PURO), human cDNAs with WT or activating mutations found in UVM patients (CYSLTR2 and GNAQ), or downstream MAPK activating mutations (KRAS<sup>G12V</sup>, BRAF<sup>V600E</sup>, or NRAS<sup>Q61K</sup>). TPA was then withdrawn from the media to drive mutation dependence. **(B)** Expression of *GNAQ*, *CYSLTR2*, *KRAS*, and *BRAF* in melan-a cells transduced with cDNAs. All samples were compared to expression of RPL27 (mean  $\pm$  SD, n = 3). **(C)** Cells pellets in melan-a cells after TPA withdrawal for 2 weeks to show pigmentation. **(D)** Growth assay for NRAS<sup>Q61K</sup> melan-a cells compared to parental and KRAS<sup>G12V</sup> melan-a cells without TPA for six days. Growth was assayed by Celltiter-Glo 2.0 at D1, D3, and D6. Fold increase in luminescence is shown relative to D1 cell number (mean  $\pm$  SEM, n = 3). **(E)** Basal level of IP<sub>1</sub> accumulation in NRAS<sup>Q61K</sup> melan-a cells compared to other melan-a cells. **(F)** Western blot of melanocyte lineage markers (MITF, TRP2/DCT, c-KIT, and RASGRP3) upon TPA withdrawal for 2 weeks in NRAS<sup>Q61K</sup> melan-a cells. **(G)** Tukey box plot of expression of KIT, RASGRP3, DCT, and MITF from TCGA datasets in UVM and G $\alpha_q$ -mutated SKCM compared to RAS/RAF mutated SKCM. **(H)** Unsupervised hierarchical clustering of RNA-seq data from melan-a cells (+TPA), GNAQ<sup>Q209L</sup>, and KRAS<sup>G12V</sup> melan-a cells (-TPA) (duplicates shown). **(I)** Sum Z-scores of 8 gene sets highlighting the differences between groups from (H) (n = 2). Custom genes sets (first row) include genes up or downregulated in UVM and G $\alpha_q$ -mutated SKCM versus RAS/RAF mutant SKCM from TCGA (TCGA\_MEL\_Gq\_vs\_RasRaf) as well as genes up or downregulated in our GNA11<sup>Q209L</sup> Bap1<sup>-/-</sup> versus BRAF<sup>V600E</sup> Bap1<sup>-/-</sup> GEMM (Mouse\_Gna11\_vs\_Braf). For all cases  $P > .05$ ; ns,  $P < 0.05$ ; \*,  $P < 0.005$ ; \*\*,  $P < 0.0005$ ; \*\*\*,  $P < 0.0001$ , \*\*\*\*.

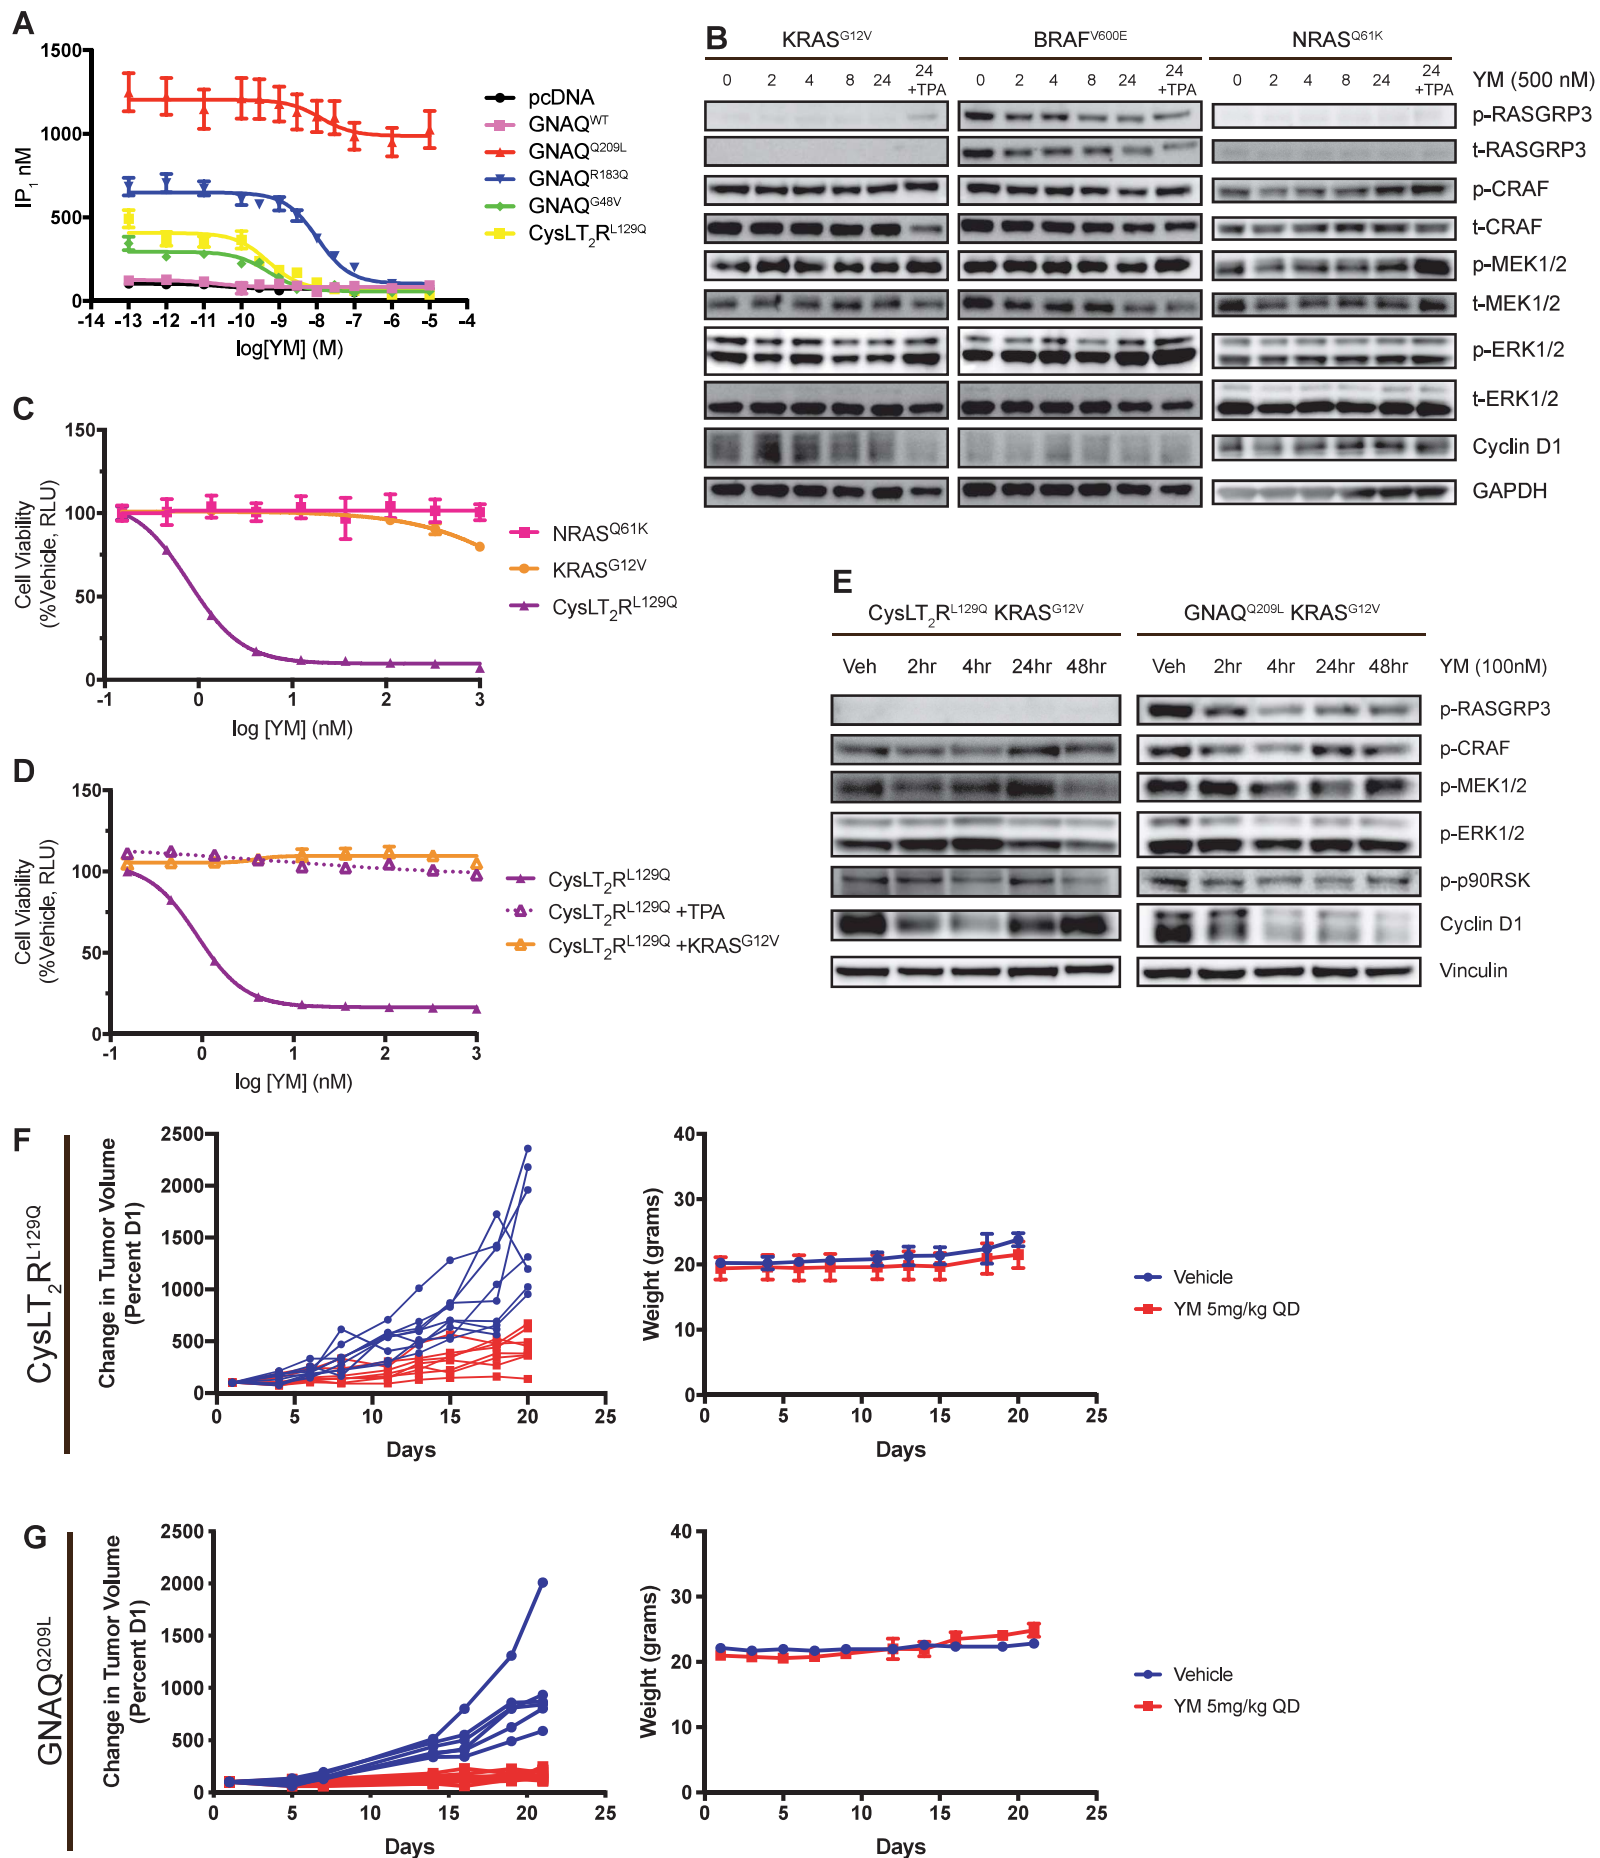

**Supplementary Figure 2.** (A) IP<sub>1</sub> accumulation in HEK-293T cells transfected with constructs at 11ng/well. Cells were treated with YM at increasing dose for 24 hours. Data are expressed as IP<sub>1</sub> concentration (nM) (mean  $\pm$  SEM, n = 3). (B) Western blot analysis of KRAS<sup>G12V</sup>, BRAF<sup>V600E</sup>, and NRAS<sup>Q61K</sup> melan-a cells. Samples were treated with 500nM YM for 0, 2, 4, 8, and 24 hours with the last lane being treatment plus TPA add back. (C) Viability curves for NRAS<sup>Q61K</sup> melan-a cells treated with YM for 5 days assayed by Celltiter-glo 2.0 (mean  $\pm$  SEM, n = 3). (D) Viability curves for CysLT<sub>2</sub>R<sup>L129Q</sup> melan-a cells supplemented with TPA or expressing oncogenic KRAS<sup>G12V</sup> treated with YM for 5 days assayed by Celltiter-glo 2.0. Data are expressed as the percentage RLU relative to that observed with vehicle (mean  $\pm$  SEM, n = 3). (E) Western blot analysis of CysLT<sub>2</sub>R<sup>L129Q</sup> and GNAQ<sup>Q209L</sup> melan-a cells expressing oncogenic KRAS<sup>G12V</sup> treated with 100nM YM for 0, 2, 4, 24, and 48 hours. (F) Percent tumor volume of CysLT<sub>2</sub>R<sup>L129Q</sup> and (G) GNAQ<sup>Q209L</sup> melan-a allografts as individual flanks treated with vehicle or YM for 20 or 21 days, respectively. Mouse weight throughout the course of experiment is plotted (right) (mean  $\pm$  SEM, n = 3-5).

Supplementary Figure 3

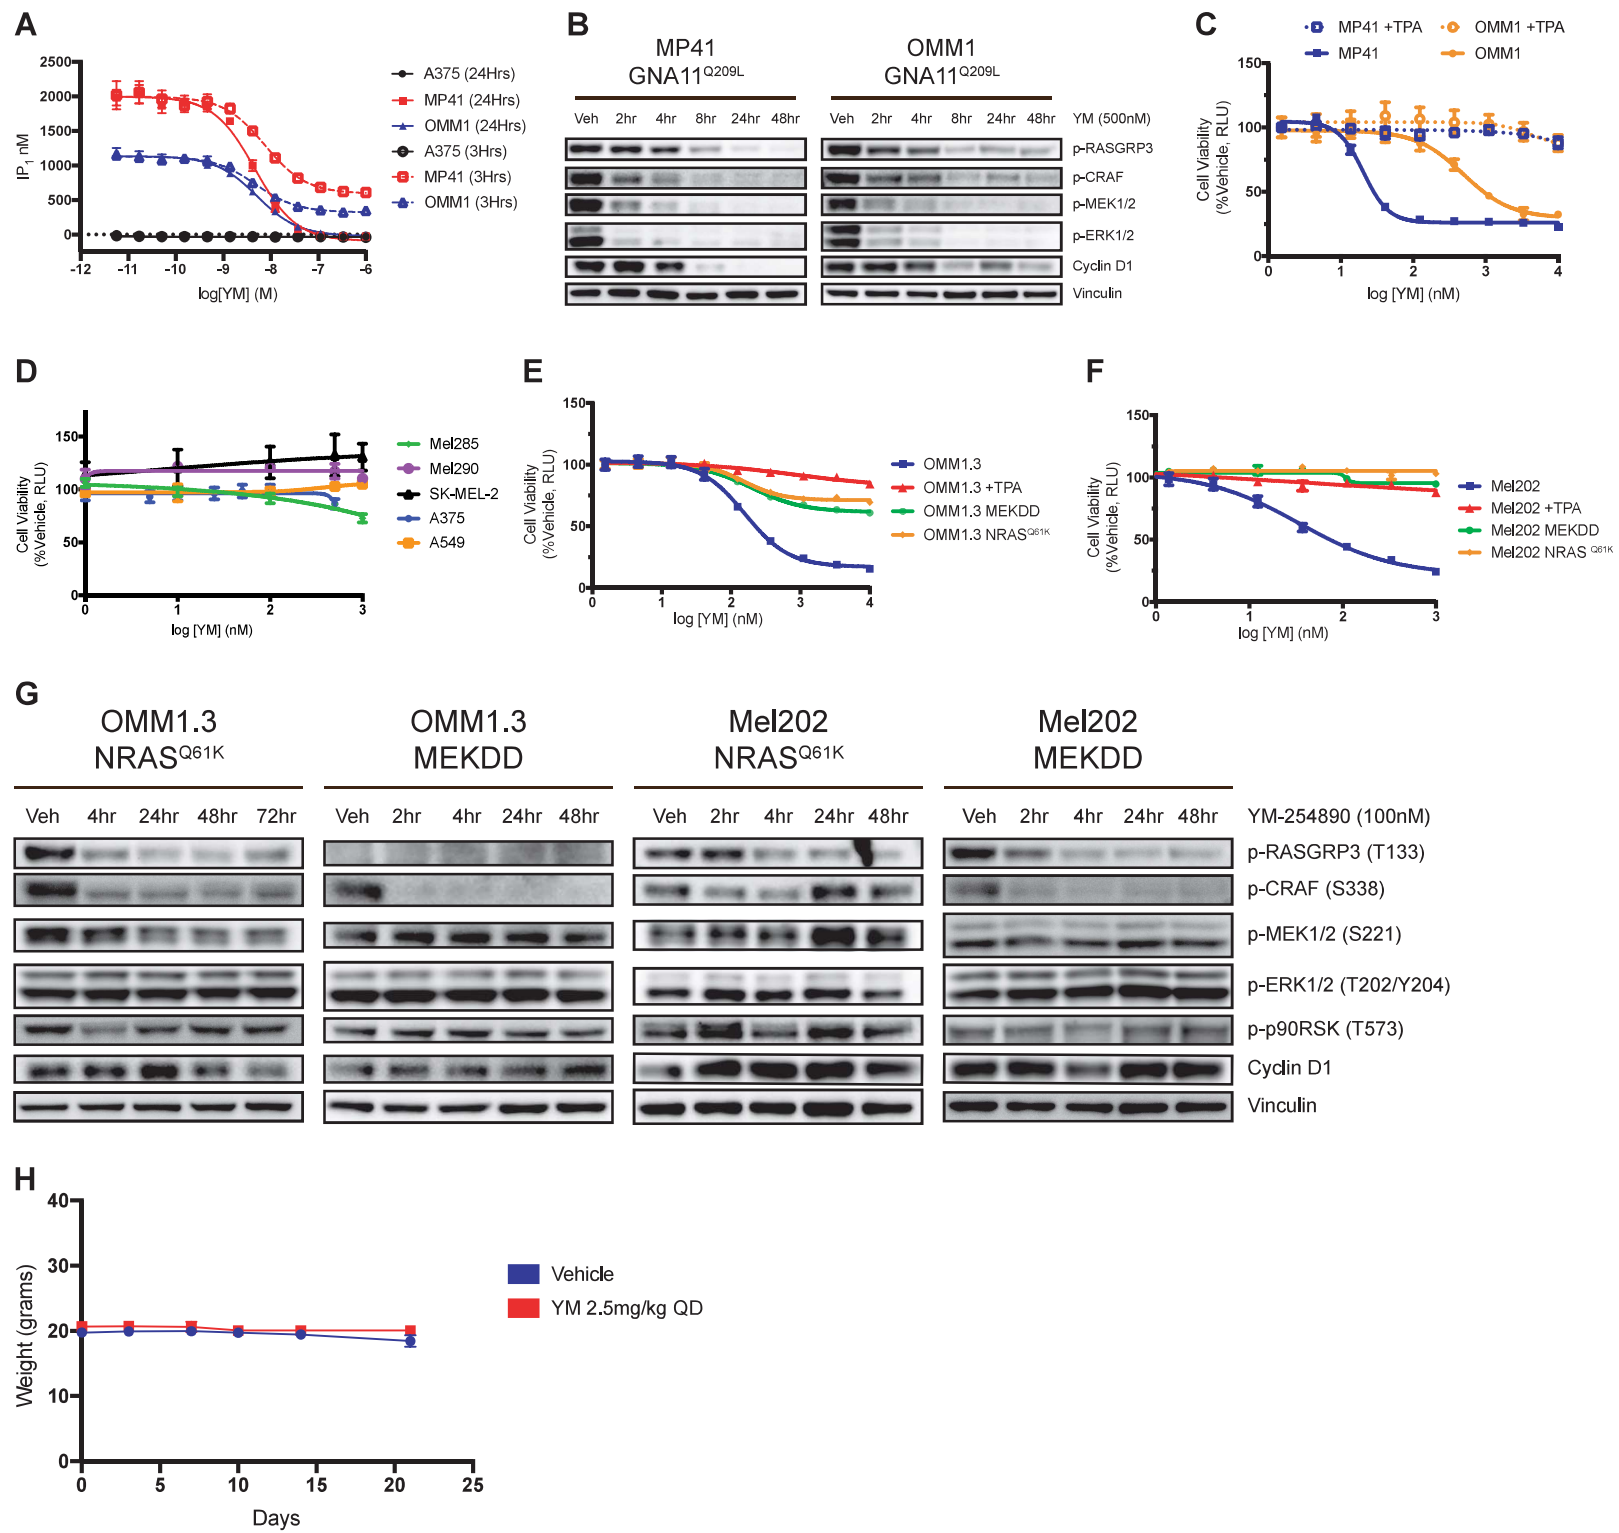

**Supplementary Figure 3.** (A) IP<sub>1</sub> accumulation assay in MP41 and OMM1 cells (*GNA11*<sup>Q209L</sup>) compared to A375 cells. Cells were treated with increasing concentrations of YM for 3 hours (dotted lines) and 24 hours (solid lines). Data are expressed as IP<sub>1</sub> concentration (mean ± SEM, n = 3). (B) Western blot analysis of indicated proteins in MP41 and OMM1 cells treated with 500nM YM at 0, 2, 4, 24, and 48 hours. (C) Viability Curves for MP41 and OMM1 cells treated with YM in the presence or absence of TPA for 5 days. (D) Viability curves for non-Gq mutant UVM cell lines Mel285 and Mel290, cutaneous melanomas A375 (BRAF<sup>V600E</sup> from Figure 4C for reference) and SK-MEL-2 (NRAS<sup>Q61R</sup>), and lung adenocarcinoma cells A549 (KRAS<sup>G12S</sup>) treated with YM for 5 days. (E) Viability curves for OMM1.3 and (F) Mel202 cells treated with YM for 5 days in the presence or absence of TPA or expressing indicated MAPK activating mutations. All viability curves were assayed by Celltiter-glo 2.0 and expressed as the percentage RLU relative to that observed with vehicle (mean ± SEM, n = 3). (G) Western blot analysis of indicated proteins in OMM1.3 or Mel202 cells expressing NRAS<sup>Q61K</sup> or MEKDD treated with 100nM YM at 0, 2, 4, 24, and 48 hours. (H) Weight for OMM1.3 xenografted mice from Fig. 3D (mean ± SEM, n = 5).

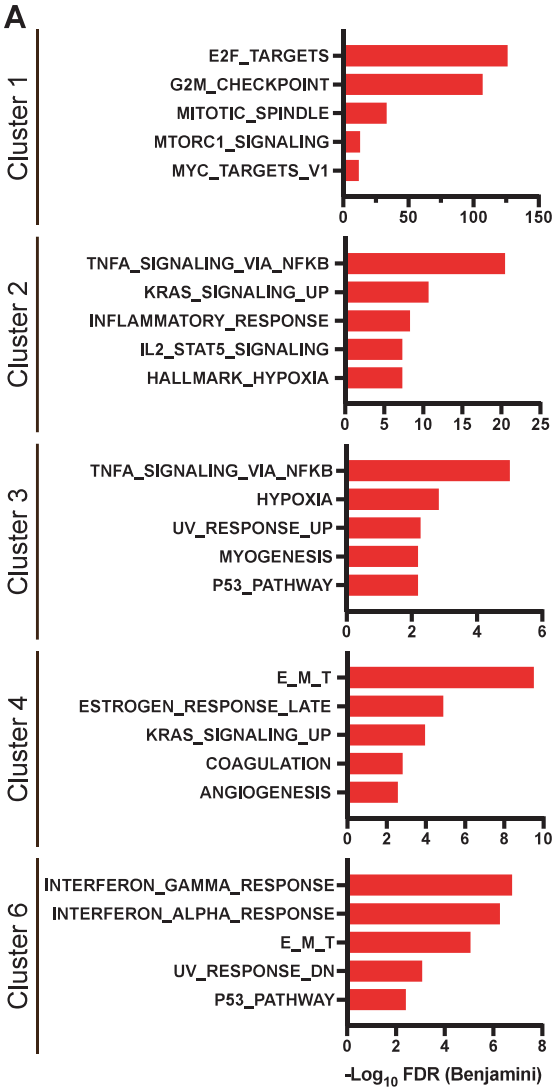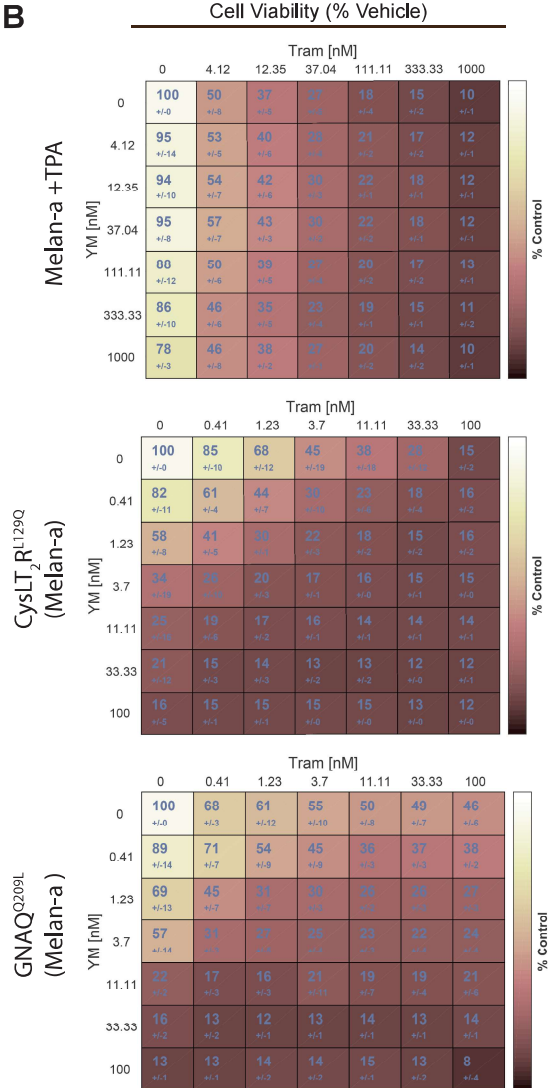

**Supplementary Figure 4. (A)** Top five HALLMARK gene set enrichments for each cluster of Fig. 4A, cluster 5 yielded no significantly enriched gene sets. Epithelial\_Mesenchymal\_Transition is abbreviated with E\_M\_T. **(B)** Cell viability diagrams for melan-a cell synergy analysis (mean  $\pm$  SEM, n = 3).

A

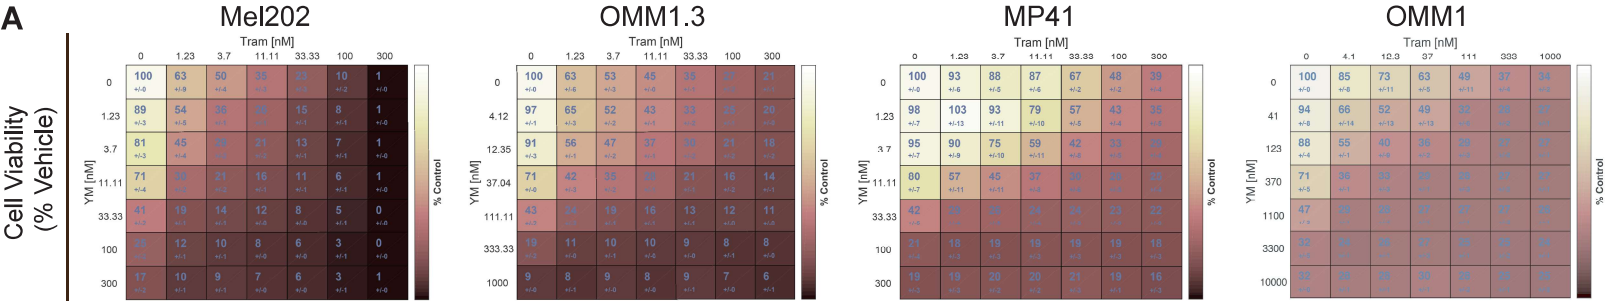

B

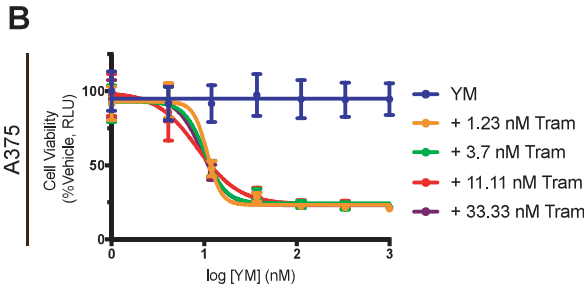

C

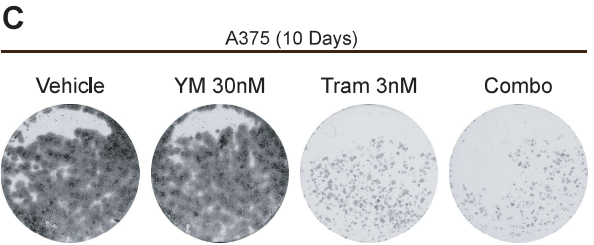

D

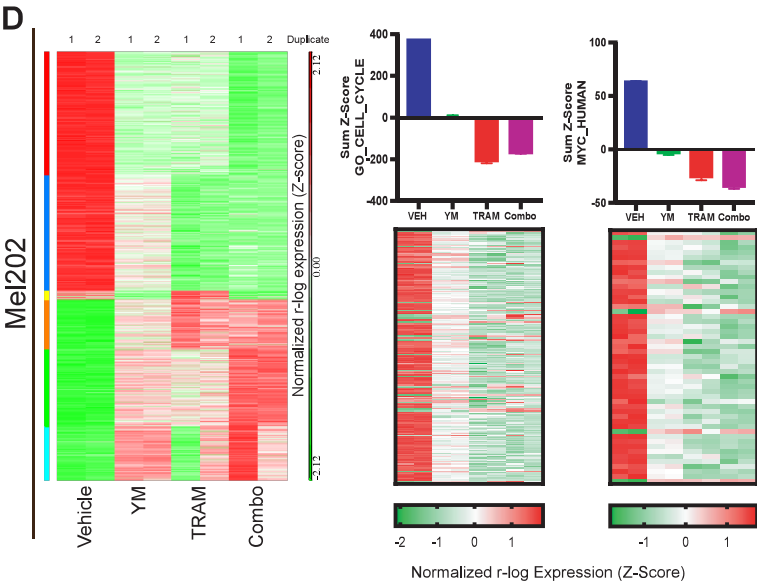

E

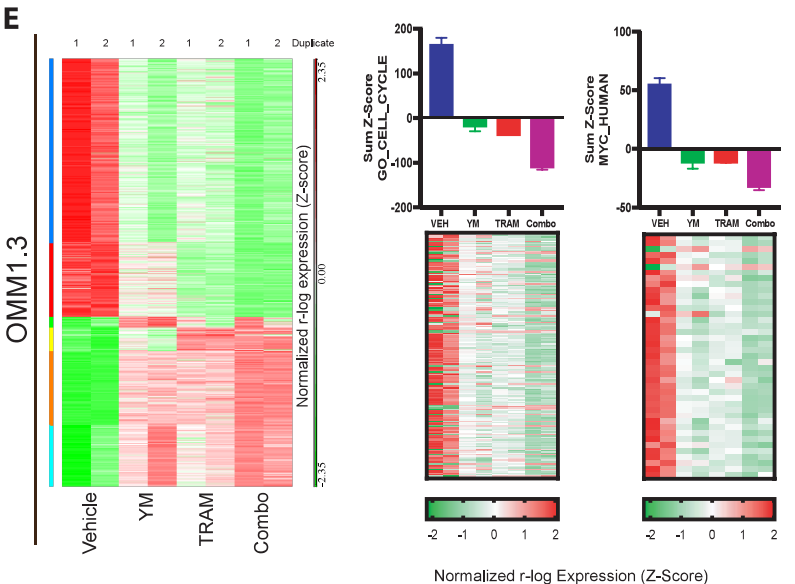

F

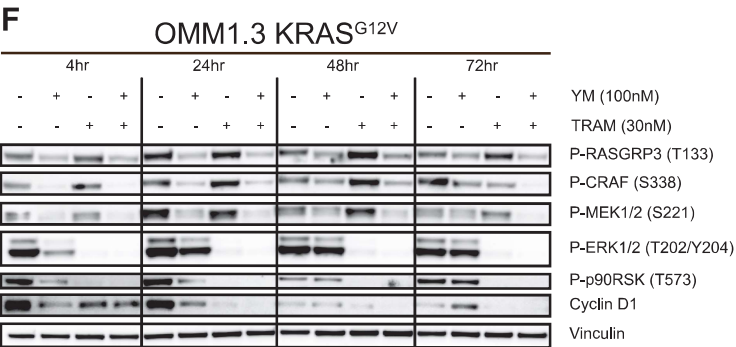

**Supplementary Figure 5. (A)** Cell viability diagrams for human UVM cell synergy analysis (mean  $\pm$  SEM, n = 3). **(B)** Viability curves for A375 cells treated with increasing doses of YM in combination with four doses of trametinib (left) and corresponding HSA synergy diagrams (right). (mean  $\pm$  SEM, n = 3). **(C)** Growth assays for A375 cells in the presence of vehicle, YM, trametinib, or Combo. **(D)** Mel202 cells treated with vehicle, YM (30nM), trametinib (10nM), or Combo for 24 hours, and **(E)** OMM1.3 cells treated with vehicle, YM (100nM), trametinib (30nM), or Combo for 24 hours (left) (duplicates shown). Data was r-log transformed, Z-scored, and then k-means clustered. Sum Z scores (top) shown for cell cycle (middle) and MYC (right) with heatmaps (bottom) showing expression of individual signature genes (mean  $\pm$  SEM, n = 2). **(F)** Western blot analysis of indicated proteins for OMM1.3 cells expressing KRAS<sup>G12V</sup> (~50% population expression). Cells were treated with vehicle, YM, trametinib, or Combo for 4, 24, 48, and 72 hours.

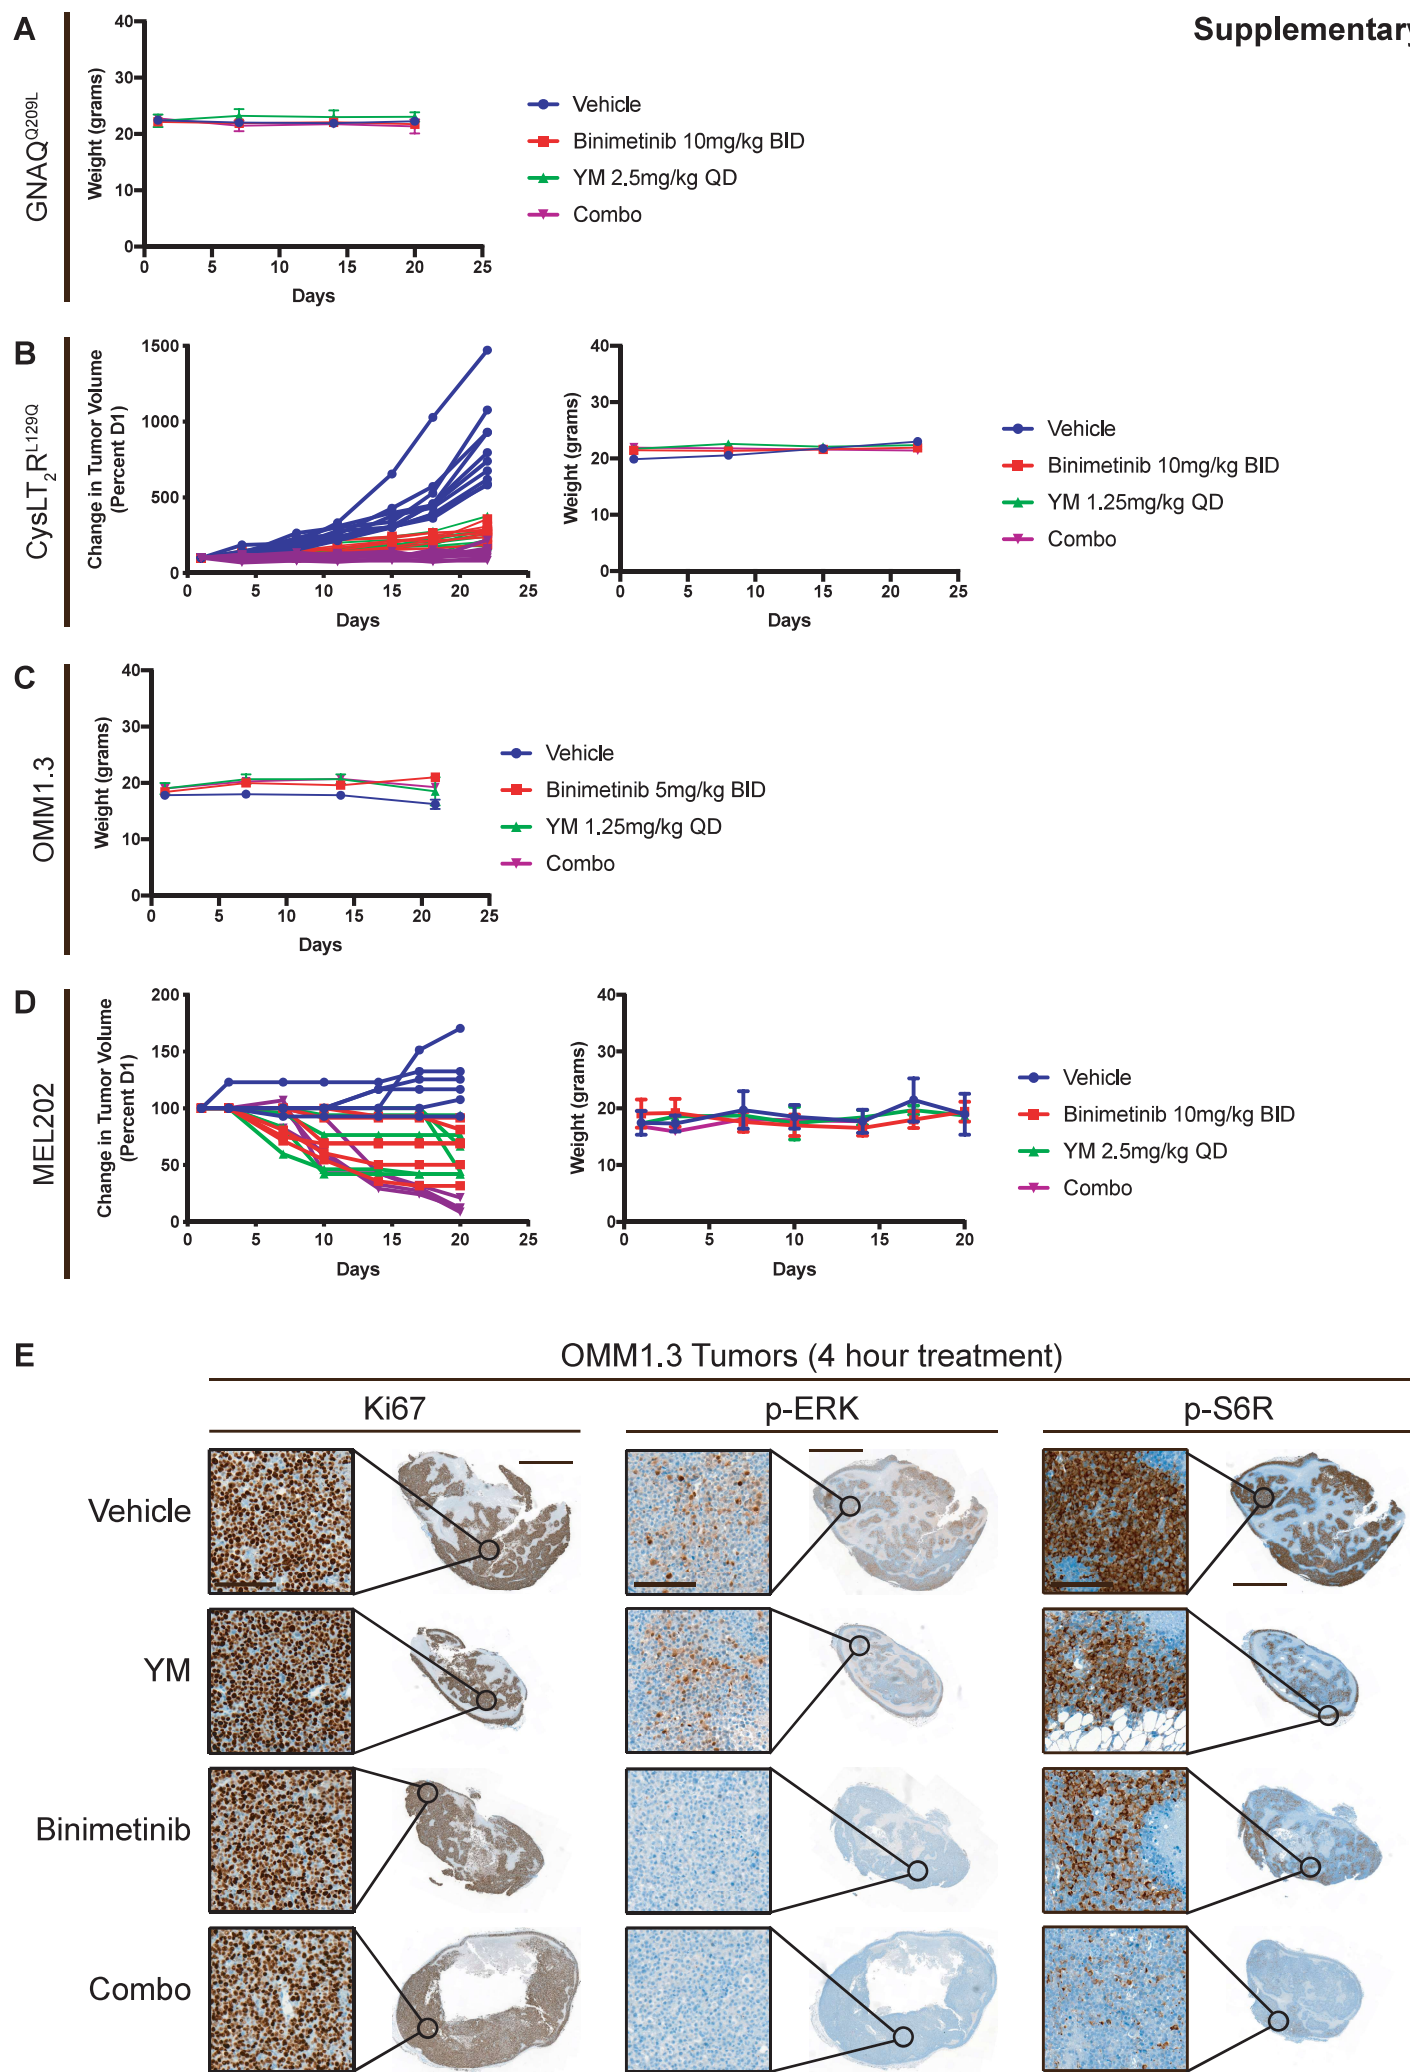

**Supplementary Figure 6. (A)** Weight of mice throughout experiment from Fig. 6A (mean  $\pm$  SEM, n = 3-5). **(B)** Percent tumor volume of CysLT<sub>2</sub>R<sup>L129Q</sup> melan-a allografts as individual flanks treated with vehicle, binimetinib, YM, or Combo for 22 days. Mouse weight throughout the course of experiment is plotted (right) (mean  $\pm$  SEM, n = 5). **(C)** Weight for OMM1.3 xenografted mice from Fig. 6C (mean  $\pm$  SEM, n = 2-5). **(D)** Percent tumor volume of Mel202 xenografts as individual flanks treated with vehicle, binimetinib, YM, or Combo for 20 days. Mouse weight throughout the course of experiment is plotted (right) (mean  $\pm$  SEM, n = 2-3). **(E)** Immunohistochemistry of OMM1.3 tumors from Fig. 6D for Ki67, p-ERK, and p-S6R. Scale bar, 50 $\mu$ m for insert (left) and 2mm for whole tumor (right).
